# Supplementary material
Source: PubMed Central journal article supplement (PMC6948771)
Supplement: jciinsight-4-127312-s196.pdf [file jciinsight-4-127312-s196.pdf]

## Supplementary Figure legends

**Supplementary Figure 1. Increased abundance of CCR2+ macrophages is detected in the post-IR myocardium.** **A)** Flow gating strategy for identification of CCR2+ and CCR2- macrophages. **B, C)** Quantification of CCR2+ macrophages at 4 days (B) or 7 days (C) post-IR. N=3-6/group. Means and standard error are shown on each graph. Student's t-test, \*p<0.05, \*\*p<0.01

**Supplementary Figure 2. Hypoxia/reoxygenation impairs autophagic flux in peritoneal macrophages.** **A)** Western blots in peritoneal macrophages isolated from control mice treated with normoxia or hypoxia (1% O<sub>2</sub>) for 16 hours followed by reoxygenation for 8 hours in the presence of Bafilomycin A1 (200 nM for 2 hours) or diluent (vehicle) followed by (B) quantification of protein in (A). Means and standard error are shown on each graph. Student's t-test, \*p<0.05

**Supplementary Figure 3. TFEB upregulates autophagy and lysosomal biogenesis in peritoneal macrophages.** **A)** Western blots in peritoneal macrophages isolated from control vs M $\phi$ -TFEB mice followed by **B-F)** quantification of proteins in A. N=3/group. Student's t-test \*p<0.05

**Supplementary Figure 4. Absolute circulating monocyte number (A) and percentage (B) in control vs M $\phi$ -TFEB mice.** Control mice (n=8) versus M $\phi$ -TFEB (n=11). Means and standard error are shown in each graph, Student's t-test, p-value's shown on graph.

**Supplementary Figure 5.** Principal component analysis using all detected mRNAs in macrophages control (n=5) versus M $\phi$ -TFEB (n=4) mice, flow-sorted into CCR2+ and CCR2- populations. Ellipsoids represent 2 standard deviations.

## Supplementary Methods

**RNA Sequencing and Analysis:** Samples were prepared according to library kit manufacturer's protocol, indexed, pooled, and sequenced on an Illumina HiSeq. Basecalls and de-multiplexing were performed with Illumina's bcl2fastq software and a custom python de-multiplexing program with a maximum of one mismatch in the indexing read. RNA-seq reads were then aligned to the Ensembl release 76 top-level assembly with STAR version 2.0.4b<sup>1</sup>. Gene counts were derived from the number of uniquely aligned unambiguous reads by Subread:featureCount version 1.4.5<sup>2</sup>. Isoform expression of known Ensembl transcripts were estimated with Sailfish version 0.6.13<sup>3</sup>. Sequencing performance was assessed for the total number of aligned reads, total number of uniquely aligned reads, and features detected. The ribosomal fraction, known junction saturation, and read distribution over known gene models were quantified with RSeQC version 2.3<sup>4</sup>.

All gene counts were then imported into the R/Bioconductor package EdgeR<sup>5</sup> and TMM normalization size factors were calculated to adjust for samples for differences in library size. Ribosomal genes and genes not expressed in the smallest group size minus one samples greater than one count-per-million were excluded from further analysis. The TMM size factors and the matrix of counts were then imported into the R/Bioconductor package Limma<sup>6</sup>. Weighted likelihoods based on the observed mean-variance relationship of every gene and sample were then calculated for all samples with the voomWithQualityWeights<sup>7</sup>. The performance of all genes was assessed with plots of the residual standard deviation of every gene to their average log-count with a robustly fitted trend line of the residuals. Differential expression analysis was then performed to analyze for differences between conditions and the results were filtered for only those genes with Benjamini-Hochberg false-discovery rate adjusted p-values less than or equal to 0.02.

For each contrast extracted with Limma, global perturbations in known Gene Ontology (GO) terms and KEGG pathways were detected using the R/Bioconductor package GAGE<sup>8</sup> to test for changes

in expression of the reported log 2 fold-changes reported by Limma in each term versus the background log 2 fold-changes of all genes found outside the respective term. The R/Bioconductor package heatmap3<sup>9</sup> and Pathview<sup>10</sup> was used to display heatmaps or annotated KEGG graphs across groups of samples for each GO term or KEGG pathway (respectively) with a Benjamini-Hochberg false-discovery rate adjusted p-value less than or equal to 0.05. Heatmaps and PCA plots were prepared using Partek Genomics Suite 7.0 (Partek, St Louis, MO). Unsupervised hierarchical clustering with Euclidean distance, average linkage, was used for the heatmaps.

## REFERENCES

1. Dobin, A., Davis, CA, Schlesinger, F., Drenkow, J., Zaleski, C., Jha, S., Batut, P., Chaisson, M., Gingeras, TR. STAR: ultrafast universal RNA-seq aligner. *Bioinformatics* 29, 15-21 (2013)
2. Liao, Y, Smyth, GK and Shi, W. featureCounts: an efficient general purpose program for assigning sequence reads to genomic features. *Bioinformatics*, 30:923-30 (2014).
3. Patro, R., Duggal, G., Love, M. I., Irizarry, R. A., & Kingsford, C. Salmon provides fast and bias-aware quantification of transcript expression. *Nature Methods* 14 (2017).
4. Wang, L., Wang, S., & Li, W. RSeQC: quality control of RNA-seq experiments. *Bioinformatics* 28, 2184–2185 (2012).
5. Robinson MD, McCarthy DJ, Smyth GK. edgeR: a Bioconductor package for differential expression analysis of digital gene expression data. *Bioinformatics*, 26(1), 139-140 (2010).
6. Ritchie, ME, Phipson, B, Wu, D, Hu, Y, Law, CW, Shi, W, and Smyth, GK. limma powers differential expression analyses for RNA-sequencing and microarray studies. *Nucleic Acids Research* 43 (2015).
7. Liu, R, Holik, AZ, Su, S, Jansz, N, Chen, K, Leong, HS, Blewitt, ME, Asselin-Labat, M-L, Smyth, GK, Ritchie, ME. Why weight? Modelling sample and observational level variability improves power in RNA-seq analyses. *Nucleic Acids Research* 43 (2015).
8. Luo, Weijun, Friedman, Michael, Shedden, Kerby, Hankenson, Kurt, Woolf, Peter. GAGE: generally applicable gene set enrichment for pathway analysis. *BMC Bioinformatics*, 10, 161 (2009).
9. Zhao, S., Guo Y., Sheng, Q., Shyr, Y. Advanced Heat Map and Clustering Analysis Using Heatmap3. *Biomed Research International*, 2014, 6 pages (2014).

10. Luo, Weijun, Brouwer, Cory. Pathview: an R/Bioconductor package for pathway-based data integration and visualization. *Bioinformatics*, 29(14), 1830-1831 (2013).

A

# Gating Strategy

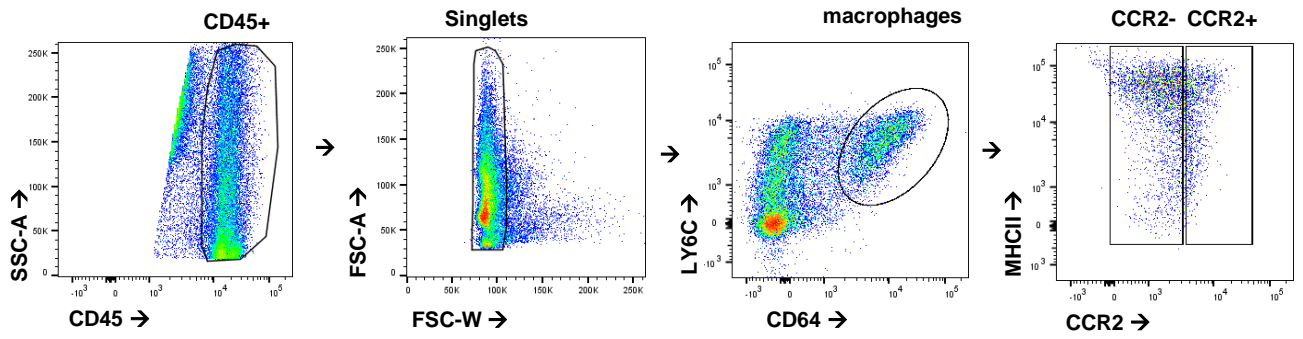

B

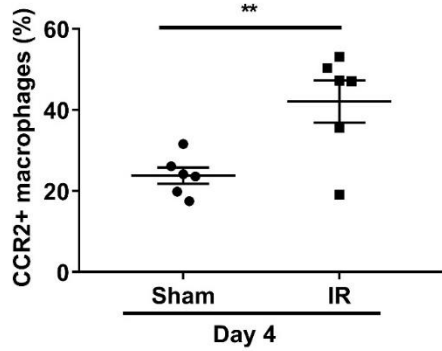

C

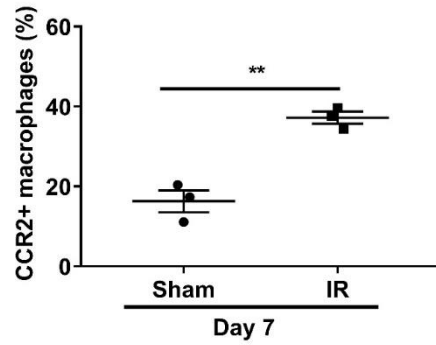

**Supplementary Figure 1. Increased abundance of CCR2+ macrophages is detected in the post-IR myocardium.** A) Flow gating strategy for identification of CCR2+ and CCR2- macrophages. B, C) Quantification of CCR2+ macrophages at 4 days (B) or 7 days (C) post-IR. N=3-6/group. Means and standard error are shown on each graph, with each datapoint representing cells from different mice. Student's t-test, \*p<0.05, \*\*p<0.01

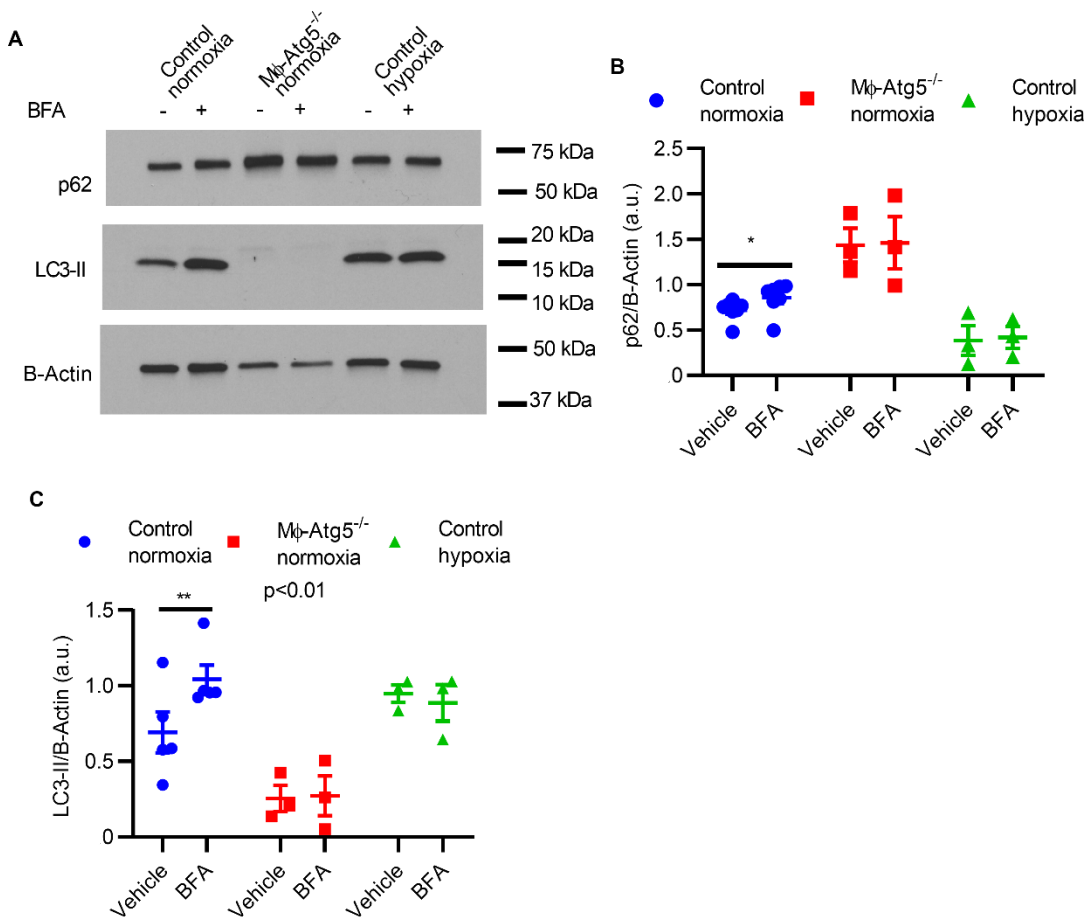

**Supplementary Figure 2. Hypoxia/reoxygenation impairs autophagic flux in peritoneal macrophages.**

A) Western blots in peritoneal macrophages isolated from either M $\phi$ -Atg5<sup>-/-</sup> mice treated with normoxia, or peritoneal macrophages isolated from control mice treated with normoxia or hypoxia (1% O<sub>2</sub>) for 16 hours followed by reoxygenation for 8 hours in the presence of Bafilomycin A1 (200 nM for 2 hours) or diluent (vehicle) followed by (B) quantification of protein in (A). Means and standard error are shown on each graph, with each datapoint representing cells from one mouse. Paired student's t-test, \*p<0.05

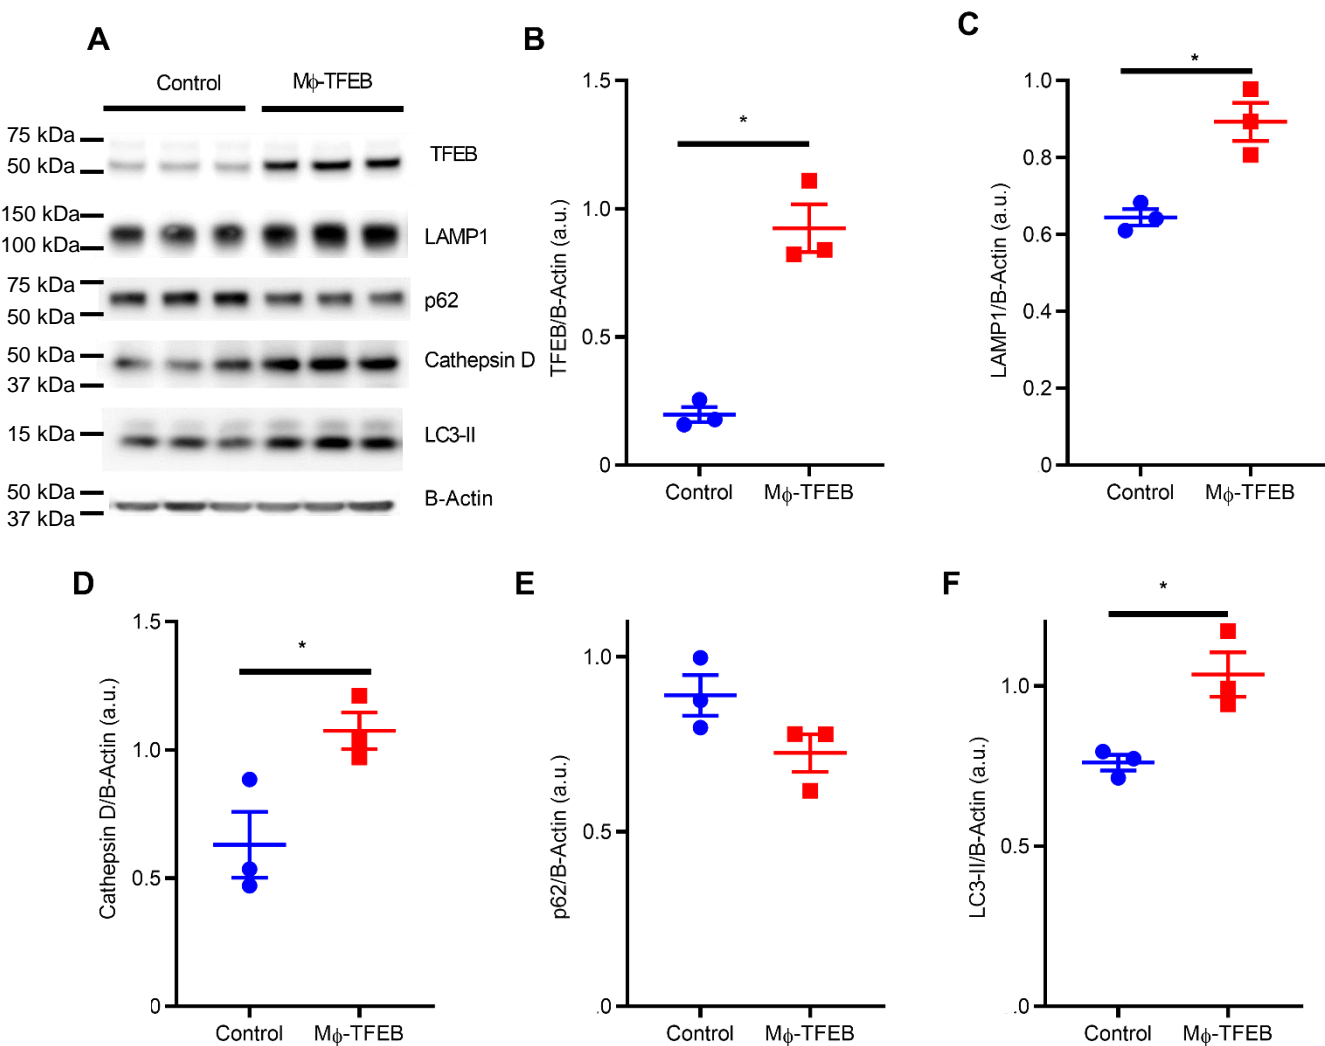

**Supplementary Figure 3. TFEB upregulates autophagy and lysosomal biogenesis in peritoneal macrophages.** A) Western blots in peritoneal macrophages isolated from control vs M $\phi$ -TFEB mice followed by B-F) quantification of proteins in A. N=3/group, each datapoint represents cells from different mice, with means and standard error shown on each graph. Student's t-test \*p<0.05

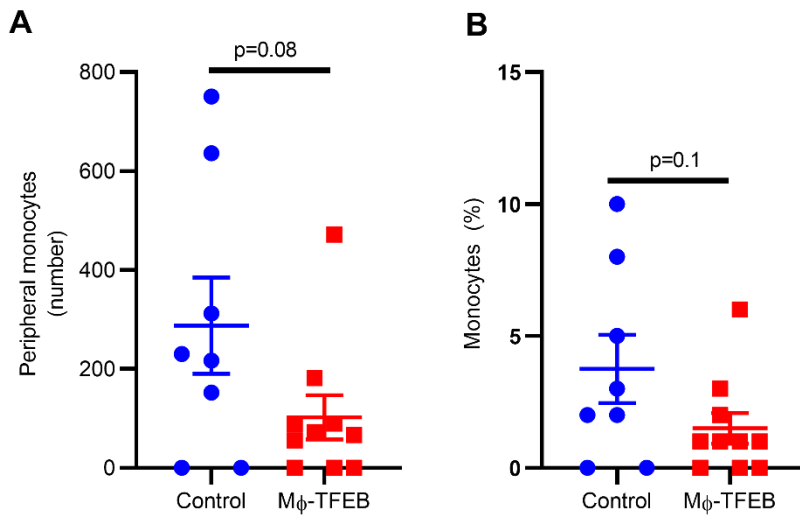

**Supplementary Figure 4. Absolute circulating monocyte number (A) and percentage (B) in control vs M $\phi$ -TFEB mice.** Control mice (n=8) versus M $\phi$ -TFEB (n=11). Means and standard error are shown in each graph, with each datapoint representing an individual mouse. Student's t-test, p-values shown on graph.



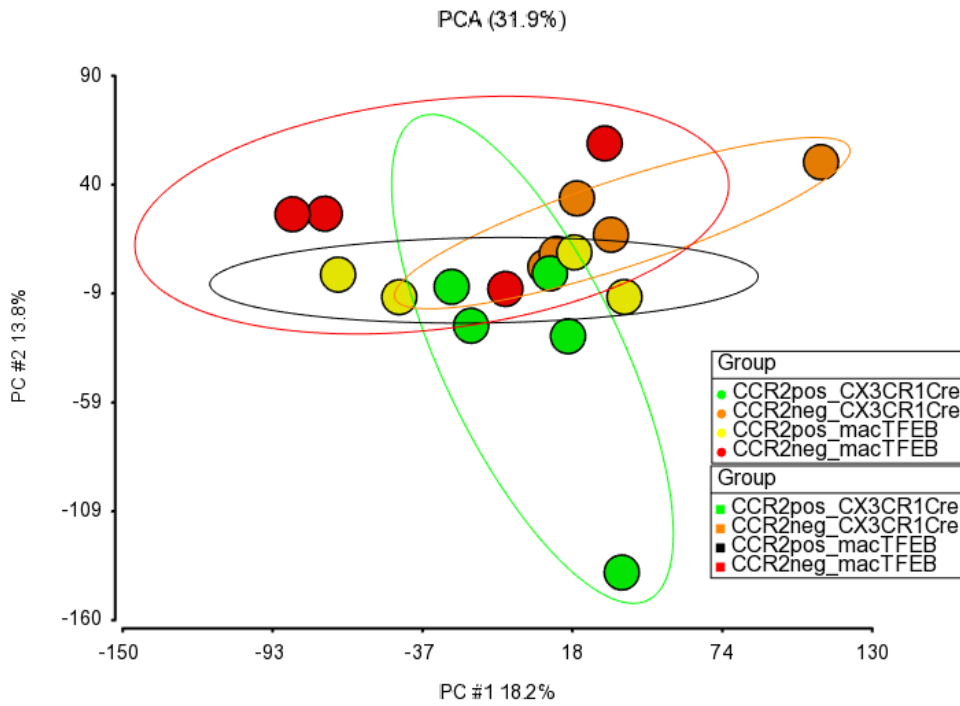

**Supplementary Figure 5. Principal component analysis using all detected mRNAs in macrophages control (n=5) versus M $\phi$ -TFEB (n=4) mice, flow-sorted into CCR2+ and CCR2- populations. Each circle is one mouse, and ellipsoids represent 2 standard deviations.**

| Feature_ID | entrezgene | external_g | gene_biotype   | external_g | transcript_ |
|------------|------------|------------|----------------|------------|-------------|
| ENSMUSGC   | 12444      | Ccnd2      | protein_coding | MGI Symbc  | 8           |
| ENSMUSGC   | 20317      | Serpinf1   | protein_coding | MGI Symbc  | 8           |
| ENSMUSGC   | 66511      | Chtop      | protein_coding | MGI Symbc  | 9           |
| ENSMUSGC   | 68294      | Mfsd10     | protein_coding | MGI Symbc  | 21          |
| ENSMUSGC   | 18140      | Uhrf1      | protein_coding | MGI Symbc  | 7           |
| ENSMUSGC   | 11433      | Acp5       | protein_coding | MGI Symbc  | 6           |
| ENSMUSGC   | 23854      | Def8       | protein_coding | MGI Symbc  | 11          |
| ENSMUSGC   | 17285      | Meox1      | protein_coding | MGI Symbc  | 1           |
| ENSMUSGC   | 14235      | Foxm1      | protein_coding | MGI Symbc  | 8           |
| ENSMUSGC   | 93843      | Pnck       | protein_coding | MGI Symbc  | 5           |
| ENSMUSGC   | 54141      | Spag5      | protein_coding | MGI Symbc  | 8           |
| ENSMUSGC   | 22259      | Nr1h3      | protein_coding | MGI Symbc  | 8           |
| ENSMUSGC   | 20375      | Spi1       | protein_coding | MGI Symbc  | 4           |
| ENSMUSGC   | 26362      | Axl        | protein_coding | MGI Symbc  | 8           |
| ENSMUSGC   | 52132      | Ccdc97     | protein_coding | MGI Symbc  | 9           |
| ENSMUSGC   | 235040     | Atg4d      | protein_coding | MGI Symbc  | 5           |
| ENSMUSGC   | 27221      | Chaf1a     | protein_coding | MGI Symbc  | 1           |
| ENSMUSGC   | 56457      | Clptm1     | protein_coding | MGI Symbc  | 9           |
| ENSMUSGC   | 11816      | ApoE       | protein_coding | MGI Symbc  | 11          |
| ENSMUSGC   | 12576      | Cdkn1b     | protein_coding | MGI Symbc  | 3           |
| ENSMUSGC   | 19060      | Ppp5c      | protein_coding | MGI Symbc  | 11          |
| ENSMUSGC   | 16890      | Lipe       | protein_coding | MGI Symbc  | 8           |
| ENSMUSGC   | 18807      | Pld3       | protein_coding | MGI Symbc  | 8           |
| ENSMUSGC   | 71673      | Rnf215     | protein_coding | MGI Symbc  | 4           |
| ENSMUSGC   | 12870      | Cp         | protein_coding | MGI Symbc  | 16          |
| ENSMUSGC   | 19348      | Kif20a     | protein_coding | MGI Symbc  | 2           |
| ENSMUSGC   | 16197      | Ii7r       | protein_coding | MGI Symbc  | 4           |
| ENSMUSGC   | 26403      | Map3k11    | protein_coding | MGI Symbc  | 1           |
| ENSMUSGC   | 20728      | Spic       | protein_coding | MGI Symbc  | 4           |
| ENSMUSGC   | 20392      | Sgce       | protein_coding | MGI Symbc  | 13          |
| ENSMUSGC   | 17085      | Ly9        | protein_coding | MGI Symbc  | 5           |
| ENSMUSGC   | 56221      | Ccl24      | protein_coding | MGI Symbc  | 2           |
| ENSMUSGC   | 17988      | NdrG1      | protein_coding | MGI Symbc  | 13          |
| ENSMUSGC   | 17218      | Mcm5       | protein_coding | MGI Symbc  | 5           |
| ENSMUSGC   | 66929      | Asf1b      | protein_coding | MGI Symbc  | 3           |
| ENSMUSGC   | 81489      | Dnajb1     | protein_coding | MGI Symbc  | 2           |
| ENSMUSGC   | 17540      | Mrvi1      | protein_coding | MGI Symbc  | 7           |
| ENSMUSGC   | 11717      | Ampd3      | protein_coding | MGI Symbc  | 8           |
| ENSMUSGC   | 17394      | Mmp8       | protein_coding | MGI Symbc  | 1           |
| ENSMUSGC   | 56213      | Htra1      | protein_coding | MGI Symbc  | 5           |
| ENSMUSGC   | 23887      | Ggt5       | protein_coding | MGI Symbc  | 7           |
| ENSMUSGC   | 53328      | Pgrmc1     | protein_coding | MGI Symbc  | 1           |
| ENSMUSGC   | 56876      | Nsmf       | protein_coding | MGI Symbc  | 18          |
| ENSMUSGC   | 57441      | Gmnn       | protein_coding | MGI Symbc  | 5           |
| ENSMUSGC   | 193742     | Abhd16a    | protein_coding | MGI Symbc  | 7           |
| ENSMUSGC   | 51793      | Ddah2      | protein_coding | MGI Symbc  | 4           |

|          |        |          |                |           |    |
|----------|--------|----------|----------------|-----------|----|
| ENSMUSGC | 18973  | Pole     | protein_coding | MGI Symbc | 7  |
| ENSMUSGC | 12943  | Pcdha11  | protein_coding | MGI Symbc | 1  |
| ENSMUSGC | 234388 | Ccdc124  | protein_coding | MGI Symbc | 2  |
| ENSMUSGC | 69748  | Aldh16a1 | protein_coding | MGI Symbc | 12 |
| ENSMUSGC | 15903  | Id3      | protein_coding | MGI Symbc | 3  |
| ENSMUSGC | 13033  | Ctsd     | protein_coding | MGI Symbc | 3  |
| ENSMUSGC | 68041  | Mid1ip1  | protein_coding | MGI Symbc | 5  |
| ENSMUSGC | 320100 | Relt     | protein_coding | MGI Symbc | 6  |
| ENSMUSGC | 55942  | Sertad1  | protein_coding | MGI Symbc | 2  |
| ENSMUSGC | 56615  | Mgst1    | protein_coding | MGI Symbc | 8  |
| ENSMUSGC | 18028  | Nfib     | protein_coding | MGI Symbc | 12 |
| ENSMUSGC | 93671  | Cd163    | protein_coding | MGI Symbc | 3  |
| ENSMUSGC | 14030  | Ewsr1    | protein_coding | MGI Symbc | 13 |
| ENSMUSGC | 15586  | Hyal1    | protein_coding | MGI Symbc | 5  |
| ENSMUSGC | 68279  | Mcoln2   | protein_coding | MGI Symbc | 5  |
| ENSMUSGC | 11492  | Adam19   | protein_coding | MGI Symbc | 4  |
| ENSMUSGC | 63872  | Zfp296   | protein_coding | MGI Symbc | 2  |
| ENSMUSGC | 16551  | Kif11    | protein_coding | MGI Symbc | 1  |
| ENSMUSGC | 79566  | Sh3bp5l  | protein_coding | MGI Symbc | 5  |
| ENSMUSGC | 63873  | Trpv4    | protein_coding | MGI Symbc | 8  |
| ENSMUSGC | 105522 | Ankrd28  | protein_coding | MGI Symbc | 10 |
| ENSMUSGC | 27362  | Dnajb9   | protein_coding | MGI Symbc | 2  |
| ENSMUSGC | 66220  | Zdhhc12  | protein_coding | MGI Symbc | 4  |
| ENSMUSGC | 54392  | Ncapg    | protein_coding | MGI Symbc | 6  |
| ENSMUSGC | 76612  | Lrrc27   | protein_coding | MGI Symbc | 9  |
| ENSMUSGC | 243362 | Stard13  | protein_coding | MGI Symbc | 10 |
| ENSMUSGC | 60533  | Cd274    | protein_coding | MGI Symbc | 1  |
| ENSMUSGC | 16164  | Il13ra1  | protein_coding | MGI Symbc | 1  |
| ENSMUSGC | 12189  | Brca1    | protein_coding | MGI Symbc | 7  |
| ENSMUSGC | 72324  | Plxdc1   | protein_coding | MGI Symbc | 4  |
| ENSMUSGC | 56745  | C1qtnf1  | protein_coding | MGI Symbc | 4  |
| ENSMUSGC | 59040  | Rhot1    | protein_coding | MGI Symbc | 9  |
| ENSMUSGC | 11799  | Birc5    | protein_coding | MGI Symbc | 2  |
| ENSMUSGC | 17395  | Mmp9     | protein_coding | MGI Symbc | 4  |
| ENSMUSGC | 320405 | Cadps2   | protein_coding | MGI Symbc | 13 |
| ENSMUSGC | 170758 | Rac3     | protein_coding | MGI Symbc | 3  |
| ENSMUSGC | 17135  | Mafk     | protein_coding | MGI Symbc | 3  |
| ENSMUSGC | 14778  | Gpx3     | protein_coding | MGI Symbc | 3  |
| ENSMUSGC | 78912  | Sp2      | protein_coding | MGI Symbc | 3  |
| ENSMUSGC | 69938  | Scrn1    | protein_coding | MGI Symbc | 6  |
| ENSMUSGC | 67903  | Gipc1    | protein_coding | MGI Symbc | 3  |
| ENSMUSGC | 12539  | Cdc37    | protein_coding | MGI Symbc | 3  |
| ENSMUSGC | 27357  | Gyg      | protein_coding | MGI Symbc | 4  |
| ENSMUSGC | 102857 | Slc6a8   | protein_coding | MGI Symbc | 13 |
| ENSMUSGC | 17101  | Lyst     | protein_coding | MGI Symbc | 7  |
| ENSMUSGC | 67141  | Fbxo5    | protein_coding | MGI Symbc | 2  |
| ENSMUSGC | 103268 | Cep57l1  | protein_coding | MGI Symbc | 12 |

|          |        |          |                |           |    |
|----------|--------|----------|----------------|-----------|----|
| ENSMUSGC | 12534  | Cdk1     | protein_coding | MGI Symbc | 7  |
| ENSMUSGC | 20393  | Sgk1     | protein_coding | MGI Symbc | 13 |
| ENSMUSGC | 26464  | Vnn3     | protein_coding | MGI Symbc | 1  |
| ENSMUSGC | 27355  | Pald1    | protein_coding | MGI Symbc | 3  |
| ENSMUSGC | 74747  | Ddit4    | protein_coding | MGI Symbc | 1  |
| ENSMUSGC | 52679  | E2f7     | protein_coding | MGI Symbc | 9  |
| ENSMUSGC | 237542 | Osbpl8   | protein_coding | MGI Symbc | 4  |
| ENSMUSGC | 21664  | Phlda1   | protein_coding | MGI Symbc | 2  |
| ENSMUSGC | 20222  | Sf3a2    | protein_coding | MGI Symbc | 4  |
| ENSMUSGC | 13650  | Rhbdf1   | protein_coding | MGI Symbc | 9  |
| ENSMUSGC | 15366  | Hmmr     | protein_coding | MGI Symbc | 4  |
| ENSMUSGC | 76884  | Cyfp2    | protein_coding | MGI Symbc | 5  |
| ENSMUSGC | 30794  | Pdlim4   | protein_coding | MGI Symbc | 5  |
| ENSMUSGC | 66140  | Ska2     | protein_coding | MGI Symbc | 3  |
| ENSMUSGC | 319504 | Nrcam    | protein_coding | MGI Symbc | 17 |
| ENSMUSGC | 20135  | Rrm2     | protein_coding | MGI Symbc | 4  |
| ENSMUSGC | 13435  | Dnmt3a   | protein_coding | MGI Symbc | 18 |
| ENSMUSGC | 217335 | Fbf1     | protein_coding | MGI Symbc | 12 |
| ENSMUSGC | 109212 | Pimreg   | protein_coding | MGI Symbc | 5  |
| ENSMUSGC | 114886 | Cygb     | protein_coding | MGI Symbc | 1  |
| ENSMUSGC | 21973  | Top2a    | protein_coding | MGI Symbc | 7  |
| ENSMUSGC | 108800 | Ston2    | protein_coding | MGI Symbc | 7  |
| ENSMUSGC | 110095 | Pygl     | protein_coding | MGI Symbc | 6  |
| ENSMUSGC | 104001 | Rtn1     | protein_coding | MGI Symbc | 6  |
| ENSMUSGC | 11847  | Arg2     | protein_coding | MGI Symbc | 1  |
| ENSMUSGC | 12192  | Zfp36l1  | protein_coding | MGI Symbc | 4  |
| ENSMUSGC | 78767  | Efcab11  | protein_coding | MGI Symbc | 7  |
| ENSMUSGC | 65256  | Asb2     | protein_coding | MGI Symbc | 4  |
| ENSMUSGC | 21809  | Tgfb3    | protein_coding | MGI Symbc | 1  |
| ENSMUSGC | 14137  | Fdft1    | protein_coding | MGI Symbc | 4  |
| ENSMUSGC | 21928  | Tnfaip2  | protein_coding | MGI Symbc | 11 |
| ENSMUSGC | 14538  | Gcnt2    | protein_coding | MGI Symbc | 6  |
| ENSMUSGC | 17152  | Mak      | protein_coding | MGI Symbc | 8  |
| ENSMUSGC | 66895  | Pxdc1    | protein_coding | MGI Symbc | 4  |
| ENSMUSGC | 23882  | Gadd45g  | protein_coding | MGI Symbc | 2  |
| ENSMUSGC | 11992  | Auh      | protein_coding | MGI Symbc | 13 |
| ENSMUSGC | 69672  | Txndc15  | protein_coding | MGI Symbc | 2  |
| ENSMUSGC | 74470  | Cep72    | protein_coding | MGI Symbc | 7  |
| ENSMUSGC | 78771  | Mctp1    | protein_coding | MGI Symbc | 8  |
| ENSMUSGC | 21834  | Thrb     | protein_coding | MGI Symbc | 7  |
| ENSMUSGC | 21807  | Tsc22d1  | protein_coding | MGI Symbc | 16 |
| ENSMUSGC | 56419  | Diaph3   | protein_coding | MGI Symbc | 9  |
| ENSMUSGC | 52033  | Pbk      | protein_coding | MGI Symbc | 3  |
| ENSMUSGC | 71988  | Esco2    | protein_coding | MGI Symbc | 5  |
| ENSMUSGC | 12274  | C6       | protein_coding | MGI Symbc | 5  |
| ENSMUSGC | 69574  | Cmb1     | protein_coding | MGI Symbc | 4  |
| ENSMUSGC | 67434  | Ankrd33b | protein_coding | MGI Symbc | 7  |

|          |        |          |                |           |    |
|----------|--------|----------|----------------|-----------|----|
| ENSMUSGC | 18163  | Ctnnd2   | protein_coding | MGI Symbc | 12 |
| ENSMUSGC | 17117  | Amacr    | protein_coding | MGI Symbc | 2  |
| ENSMUSGC | 239393 | Lrp12    | protein_coding | MGI Symbc | 4  |
| ENSMUSGC | 67731  | Fbxo32   | protein_coding | MGI Symbc | 1  |
| ENSMUSGC | 70472  | Atad2    | protein_coding | MGI Symbc | 8  |
| ENSMUSGC | 12818  | Col14a1  | protein_coding | MGI Symbc | 4  |
| ENSMUSGC | 29870  | Gtse1    | protein_coding | MGI Symbc | 1  |
| ENSMUSGC | 20972  | Syngn1   | protein_coding | MGI Symbc | 4  |
| ENSMUSGC | 57028  | Sh3bp1   | protein_coding | MGI Symbc | 8  |
| ENSMUSGC | 21935  | Tnfrsf17 | protein_coding | MGI Symbc | 1  |
| ENSMUSGC | 12265  | Ciita    | protein_coding | MGI Symbc | 1  |
| ENSMUSGC | 15205  | Hes1     | protein_coding | MGI Symbc | 4  |
| ENSMUSGC | 68877  | Maf1     | protein_coding | MGI Symbc | 14 |
| ENSMUSGC | 18810  | Plec     | protein_coding | MGI Symbc | 22 |
| ENSMUSGC | 11838  | Arc      | protein_coding | MGI Symbc | 2  |
| ENSMUSGC | 11658  | Alcam    | protein_coding | MGI Symbc | 7  |
| ENSMUSGC | 14525  | Gcsam    | protein_coding | MGI Symbc | 2  |
| ENSMUSGC | 57781  | Cd200r1  | protein_coding | MGI Symbc | 2  |
| ENSMUSGC | 54613  | St3gal6  | protein_coding | MGI Symbc | 14 |
| ENSMUSGC | 64136  | Sdf2l1   | protein_coding | MGI Symbc | 1  |
| ENSMUSGC | 239833 | Lmln     | protein_coding | MGI Symbc | 4  |
| ENSMUSGC | 67102  | D16Ert47 | protein_coding | MGI Symbc | 3  |
| ENSMUSGC | 106344 | Rfc4     | protein_coding | MGI Symbc | 5  |
| ENSMUSGC | 106347 | Ildr1    | protein_coding | MGI Symbc | 5  |
| ENSMUSGC | 110749 | Chaf1b   | protein_coding | MGI Symbc | 8  |
| ENSMUSGC | 16770  | Lalba    | protein_coding | MGI Symbc | 1  |
| ENSMUSGC | 26934  | Racgap1  | protein_coding | MGI Symbc | 14 |
| ENSMUSGC | 83797  | Smarcd1  | protein_coding | MGI Symbc | 1  |
| ENSMUSGC | 55985  | Cxcl13   | protein_coding | MGI Symbc | 1  |
| ENSMUSGC | 14789  | P3h3     | protein_coding | MGI Symbc | 7  |
| ENSMUSGC | 12504  | Cd4      | protein_coding | MGI Symbc | 5  |
| ENSMUSGC | 70235  | Poc1a    | protein_coding | MGI Symbc | 11 |
| ENSMUSGC | 22051  | Trip6    | protein_coding | MGI Symbc | 4  |
| ENSMUSGC | 66058  | Tmem176a | protein_coding | MGI Symbc | 7  |
| ENSMUSGC | 14793  | Cdca3    | protein_coding | MGI Symbc | 6  |
| ENSMUSGC | 72084  | Pigx     | protein_coding | MGI Symbc | 12 |
| ENSMUSGC | 20112  | Rps6ka2  | protein_coding | MGI Symbc | 1  |
| ENSMUSGC | 16004  | Igf2r    | protein_coding | MGI Symbc | 4  |
| ENSMUSGC | 64074  | Smoc2    | protein_coding | MGI Symbc | 1  |
| ENSMUSGC | 21425  | Tfeb     | protein_coding | MGI Symbc | 15 |
| ENSMUSGC | 26382  | Fgd2     | protein_coding | MGI Symbc | 8  |
| ENSMUSGC | 67052  | Ndc80    | protein_coding | MGI Symbc | 1  |
| ENSMUSGC | 13560  | E4f1     | protein_coding | MGI Symbc | 8  |
| ENSMUSGC | 21652  | Phf1     | protein_coding | MGI Symbc | 1  |
| ENSMUSGC | 19725  | Rfx2     | protein_coding | MGI Symbc | 2  |
| ENSMUSGC | 68010  | Bambi    | protein_coding | MGI Symbc | 1  |
| ENSMUSGC | 21355  | Tap2     | protein_coding | MGI Symbc | 5  |

|          |        |          |                      |           |    |
|----------|--------|----------|----------------------|-----------|----|
| ENSMUSGC | 71132  | Cabyr    | protein_coding       | MGI Symbc | 7  |
| ENSMUSGC | 106952 | Arap3    | protein_coding       | MGI Symbc | 1  |
| ENSMUSGC | 69226  | Snx24    | protein_coding       | MGI Symbc | 2  |
| ENSMUSGC | 74322  | Cxxc1    | protein_coding       | MGI Symbc | 1  |
| ENSMUSGC | 68731  | Rbfa     | protein_coding       | MGI Symbc | 1  |
| ENSMUSGC | 83814  | Nedd4l   | protein_coding       | MGI Symbc | 11 |
| ENSMUSGC | 16149  | Cd74     | protein_coding       | MGI Symbc | 3  |
| ENSMUSGC | 21453  | Tcof1    | protein_coding       | MGI Symbc | 6  |
| ENSMUSGC | 107272 | Psat1    | protein_coding       | MGI Symbc | 7  |
| ENSMUSGC | 16952  | Anxa1    | protein_coding       | MGI Symbc | 7  |
| ENSMUSGC | 16889  | Lipa     | protein_coding       | MGI Symbc | 2  |
| ENSMUSGC | 67849  | Cdca5    | protein_coding       | MGI Symbc | 3  |
| ENSMUSGC | 240641 | Kif20b   | protein_coding       | MGI Symbc | 10 |
| ENSMUSGC | 77125  | Ii33     | protein_coding       | MGI Symbc | 5  |
| ENSMUSGC | NA     | Tmem134  | processed_transcript | MGI Symbc | 16 |
| ENSMUSGC | 76308  | Rab1b    | protein_coding       | MGI Symbc | 1  |
| ENSMUSGC | 23972  | Papss2   | protein_coding       | MGI Symbc | 1  |
| ENSMUSGC | 68209  | Rnaseh2c | protein_coding       | MGI Symbc | 5  |
| ENSMUSGC | 56613  | Rps6ka4  | protein_coding       | MGI Symbc | 2  |
| ENSMUSGC | 107173 | Gpr137   | protein_coding       | MGI Symbc | 5  |
| ENSMUSGC | 67590  | Tctn3    | protein_coding       | MGI Symbc | 4  |
| ENSMUSGC | 226122 | Ubt1     | protein_coding       | MGI Symbc | 1  |
| ENSMUSGC | 18034  | Nfkb2    | protein_coding       | MGI Symbc | 2  |
| ENSMUSGC | 13421  | Dnase1l3 | protein_coding       | MGI Symbc | 2  |
| ENSMUSGC | 17937  | Nab2     | protein_coding       | MGI Symbc | 4  |
| ENSMUSGC | 11501  | Adam8    | protein_coding       | MGI Symbc | 8  |
| ENSMUSGC | 21877  | Tk1      | protein_coding       | MGI Symbc | 7  |
| ENSMUSGC | 15239  | Hgs      | protein_coding       | MGI Symbc | 6  |
| ENSMUSGC | 80752  | Fam20c   | protein_coding       | MGI Symbc | 6  |
| ENSMUSGC | 74257  | Tspan17  | protein_coding       | MGI Symbc | 9  |
| ENSMUSGC | 14048  | Eya1     | protein_coding       | MGI Symbc | 9  |
| ENSMUSGC | 75712  | Tmem14a  | protein_coding       | MGI Symbc | 2  |
| ENSMUSGC | 12487  | Cd28     | protein_coding       | MGI Symbc | 3  |
| ENSMUSGC | 271697 | Cdk15    | protein_coding       | MGI Symbc | 4  |
| ENSMUSGC | 12825  | Col3a1   | protein_coding       | MGI Symbc | 7  |
| ENSMUSGC | 110895 | Slc9a4   | protein_coding       | MGI Symbc | 4  |
| ENSMUSGC | 20353  | Sema4c   | protein_coding       | MGI Symbc | 8  |
| ENSMUSGC | 104086 | Cyp27a1  | protein_coding       | MGI Symbc | 3  |
| ENSMUSGC | 64294  | Ihm2c    | protein_coding       | MGI Symbc | 3  |
| ENSMUSGC | 18582  | Pde6d    | protein_coding       | MGI Symbc | 5  |
| ENSMUSGC | 50778  | Rgs1     | protein_coding       | MGI Symbc | 9  |
| ENSMUSGC | 12628  | Cfh      | protein_coding       | MGI Symbc | 8  |
| ENSMUSGC | 18557  | Cdk18    | protein_coding       | MGI Symbc | 5  |
| ENSMUSGC | 69051  | Pycr2    | protein_coding       | MGI Symbc | 4  |
| ENSMUSGC | 78255  | Ralgps2  | protein_coding       | MGI Symbc | 15 |
| ENSMUSGC | 20652  | Soat1    | protein_coding       | MGI Symbc | 8  |
| ENSMUSGC | 108000 | Cenpf    | protein_coding       | MGI Symbc | 6  |

|          |        |          |                |           |    |
|----------|--------|----------|----------------|-----------|----|
| ENSMUSGC | 381319 | Batf3    | protein_coding | MGI Symbc | 5  |
| ENSMUSGC | 18845  | Plxna2   | protein_coding | MGI Symbc | 5  |
| ENSMUSGC | 70024  | Mcm10    | protein_coding | MGI Symbc | 10 |
| ENSMUSGC | 66977  | Nuf2     | protein_coding | MGI Symbc | 5  |
| ENSMUSGC | 67448  | Plxdc2   | protein_coding | MGI Symbc | 4  |
| ENSMUSGC | 67121  | Mastl    | protein_coding | MGI Symbc | 2  |
| ENSMUSGC | 14582  | Gfi1b    | protein_coding | MGI Symbc | 4  |
| ENSMUSGC | 70239  | Gtf3c5   | protein_coding | MGI Symbc | 7  |
| ENSMUSGC | 227671 | Gbgt1    | protein_coding | MGI Symbc | 3  |
| ENSMUSGC | 56177  | Olfm1    | protein_coding | MGI Symbc | 5  |
| ENSMUSGC | 67839  | Gpsm1    | protein_coding | MGI Symbc | 13 |
| ENSMUSGC | 241452 | Dhrs9    | protein_coding | MGI Symbc | 1  |
| ENSMUSGC | 110074 | Dut      | protein_coding | MGI Symbc | 3  |
| ENSMUSGC | 108907 | Nusap1   | protein_coding | MGI Symbc | 4  |
| ENSMUSGC | 19361  | Rad51    | protein_coding | MGI Symbc | 8  |
| ENSMUSGC | 76464  | Kn1      | protein_coding | MGI Symbc | 5  |
| ENSMUSGC | 12235  | Bub1     | protein_coding | MGI Symbc | 5  |
| ENSMUSGC | 20638  | Snrpb    | protein_coding | MGI Symbc | 4  |
| ENSMUSGC | 17064  | Cd93     | protein_coding | MGI Symbc | 1  |
| ENSMUSGC | 69270  | Gins1    | protein_coding | MGI Symbc | 4  |
| ENSMUSGC | 24105  | Rbck1    | protein_coding | MGI Symbc | 8  |
| ENSMUSGC | 72119  | Tpx2     | protein_coding | MGI Symbc | 7  |
| ENSMUSGC | 20878  | Aurka    | protein_coding | MGI Symbc | 5  |
| ENSMUSGC | 56190  | Rbm38    | protein_coding | MGI Symbc | 8  |
| ENSMUSGC | 16592  | Fabp5    | protein_coding | MGI Symbc | 2  |
| ENSMUSGC | 66934  | Dsn1     | protein_coding | MGI Symbc | 6  |
| ENSMUSGC | 320024 | Nceh1    | protein_coding | MGI Symbc | 5  |
| ENSMUSGC | 13605  | Ect2     | protein_coding | MGI Symbc | 13 |
| ENSMUSGC | 28146  | Serp1    | protein_coding | MGI Symbc | 1  |
| ENSMUSGC | 76123  | Gpsm2    | protein_coding | MGI Symbc | 4  |
| ENSMUSGC | 229709 | Ahcyl1   | protein_coding | MGI Symbc | 8  |
| ENSMUSGC | 74343  | Crtc2    | protein_coding | MGI Symbc | 8  |
| ENSMUSGC | 68659  | Fam198b  | protein_coding | MGI Symbc | 5  |
| ENSMUSGC | 11490  | Adam15   | protein_coding | MGI Symbc | 13 |
| ENSMUSGC | 22724  | Zbtb7b   | protein_coding | MGI Symbc | 9  |
| ENSMUSGC | 20351  | Sema4a   | protein_coding | MGI Symbc | 19 |
| ENSMUSGC | 404710 | Iqgap3   | protein_coding | MGI Symbc | 6  |
| ENSMUSGC | 29815  | Bcar3    | protein_coding | MGI Symbc | 10 |
| ENSMUSGC | 14579  | Gem      | protein_coding | MGI Symbc | 2  |
| ENSMUSGC | 242341 | Atp6v0d2 | protein_coding | MGI Symbc | 2  |
| ENSMUSGC | 77032  | Tstd3    | protein_coding | MGI Symbc | 1  |
| ENSMUSGC | 14211  | Smc2     | protein_coding | MGI Symbc | 5  |
| ENSMUSGC | 74152  | Stra6l   | protein_coding | MGI Symbc | 5  |
| ENSMUSGC | 622404 | Ccdc107  | protein_coding | MGI Symbc | 6  |
| ENSMUSGC | 11520  | Plin2    | protein_coding | MGI Symbc | 8  |
| ENSMUSGC | 30924  | Angptl3  | protein_coding | MGI Symbc | 3  |
| ENSMUSGC | 56309  | Mycbp    | protein_coding | MGI Symbc | 4  |

|             |        |          |                |           |    |
|-------------|--------|----------|----------------|-----------|----|
| ENSMUSGC    | 26394  | Lypla2   | protein_coding | MGI Symbc | 5  |
| ENSMUSGC    | 19366  | Rad54l   | protein_coding | MGI Symbc | 6  |
| ENSMUSGC    | 20460  | Stil     | protein_coding | MGI Symbc | 6  |
| ENSMUSGC    | 15234  | Hgf      | protein_coding | MGI Symbc | 6  |
| ENSMUSGC    | 52276  | Cdca8    | protein_coding | MGI Symbc | 6  |
| ENSMUSGC    | 100340 | Smpdl3b  | protein_coding | MGI Symbc | 1  |
| ENSMUSGC    | 71787  | Trnau1ap | protein_coding | MGI Symbc | 12 |
| ENSMUSGC    | 74155  | Errfi1   | protein_coding | MGI Symbc | 3  |
| ENSMUSGC    | 56273  | Pex14    | protein_coding | MGI Symbc | 5  |
| ENSMUSGC    | 108888 | Atad3a   | protein_coding | MGI Symbc | 9  |
| ENSMUSGC    | 27405  | Abcg3    | protein_coding | MGI Symbc | 2  |
| ENSMUSGC    | 20750  | Spp1     | protein_coding | MGI Symbc | 7  |
| ENSMUSGC    | 22022  | Tpst2    | protein_coding | MGI Symbc | 7  |
| ENSMUSGC    | 59043  | Wsb2     | protein_coding | MGI Symbc | 6  |
| ENSMUSGC    | 72542  | Pgam5    | protein_coding | MGI Symbc | 4  |
| ENSMUSGC    | 12704  | Cit      | protein_coding | MGI Symbc | 19 |
| ENSMUSGC    | 21426  | Tfec     | protein_coding | MGI Symbc | 5  |
| ENSMUSGC    | 14086  | Fscn1    | protein_coding | MGI Symbc | 7  |
| ENSMUSGC NA |        | Auts2    | protein_coding | MGI Symbc | 20 |
| ENSMUSGC    | 78829  | Tsc22d4  | protein_coding | MGI Symbc | 9  |
| ENSMUSGC    | 17220  | Mcm7     | protein_coding | MGI Symbc | 10 |
| ENSMUSGC    | 65963  | Tmem176b | protein_coding | MGI Symbc | 12 |
| ENSMUSGC    | 93695  | GpnmB    | protein_coding | MGI Symbc | 5  |
| ENSMUSGC    | 109648 | Npy      | protein_coding | MGI Symbc | 1  |
| ENSMUSGC    | 56150  | Mad2l1   | protein_coding | MGI Symbc | 4  |
| ENSMUSGC    | 18844  | Plxna1   | protein_coding | MGI Symbc | 6  |
| ENSMUSGC    | 20893  | Bhlhe40  | protein_coding | MGI Symbc | 4  |
| ENSMUSGC    | 17474  | Clec4d   | protein_coding | MGI Symbc | 3  |
| ENSMUSGC    | 69810  | Clec4b1  | protein_coding | MGI Symbc | 2  |
| ENSMUSGC    | 13730  | Emp1     | protein_coding | MGI Symbc | 6  |
| ENSMUSGC    | 66857  | Plbd1    | protein_coding | MGI Symbc | 4  |
| ENSMUSGC    | 58186  | Rad18    | protein_coding | MGI Symbc | 8  |
| ENSMUSGC    | 79362  | Bhlhe41  | protein_coding | MGI Symbc | 3  |
| ENSMUSGC    | 52163  | Camk1    | protein_coding | MGI Symbc | 6  |
| ENSMUSGC    | 19362  | Rad51ap1 | protein_coding | MGI Symbc | 10 |
| ENSMUSGC    | 83382  | Siglece  | protein_coding | MGI Symbc | 2  |
| ENSMUSGC    | 18036  | Nfkbib   | protein_coding | MGI Symbc | 3  |
| ENSMUSGC    | 110033 | Kif22    | protein_coding | MGI Symbc | 6  |
| ENSMUSGC    | 20887  | Sult1a1  | protein_coding | MGI Symbc | 4  |
| ENSMUSGC    | 67800  | Dgat2    | protein_coding | MGI Symbc | 6  |
| ENSMUSGC    | 114332 | Lyve1    | protein_coding | MGI Symbc | 2  |
| ENSMUSGC    | 11535  | Adm      | protein_coding | MGI Symbc | 2  |
| ENSMUSGC    | 29810  | Bag3     | protein_coding | MGI Symbc | 1  |
| ENSMUSGC    | 18817  | Plk1     | protein_coding | MGI Symbc | 3  |
| ENSMUSGC    | 12971  | Crym     | protein_coding | MGI Symbc | 2  |
| ENSMUSGC    | 17345  | Mki67    | protein_coding | MGI Symbc | 2  |
| ENSMUSGC    | 21953  | Tnni2    | protein_coding | MGI Symbc | 8  |



|          |        |          |                |           |    |
|----------|--------|----------|----------------|-----------|----|
| ENSMUSGC | 18824  | Plp2     | protein_coding | MGI Symbc | 3  |
| ENSMUSGC | 13641  | Efnb1    | protein_coding | MGI Symbc | 2  |
| ENSMUSGC | 102920 | Cenpi    | protein_coding | MGI Symbc | 5  |
| ENSMUSGC | 108012 | Ap1s2    | protein_coding | MGI Symbc | 4  |
| ENSMUSGC | 66889  | Rnf128   | protein_coding | MGI Symbc | 3  |
| ENSMUSGC | 24099  | Tnfsf13b | protein_coding | MGI Symbc | 6  |
| ENSMUSGC | 15446  | Hpgd     | protein_coding | MGI Symbc | 1  |
| ENSMUSGC | 71310  | Tbc1d9   | protein_coding | MGI Symbc | 3  |
| ENSMUSGC | 64209  | Herpud1  | protein_coding | MGI Symbc | 6  |
| ENSMUSGC | 16582  | Kifc3    | protein_coding | MGI Symbc | 12 |
| ENSMUSGC | 272551 | Gins2    | protein_coding | MGI Symbc | 4  |
| ENSMUSGC | 234796 | Klhl36   | protein_coding | MGI Symbc | 3  |
| ENSMUSGC | 19339  | Rab3a    | protein_coding | MGI Symbc | 6  |
| ENSMUSGC | 56437  | Rrad     | protein_coding | MGI Symbc | 2  |
| ENSMUSGC | 56857  | Slc37a2  | protein_coding | MGI Symbc | 3  |
| ENSMUSGC | 12442  | Ccnb2    | protein_coding | MGI Symbc | 1  |
| ENSMUSGC | 17427  | Mns1     | protein_coding | MGI Symbc | 3  |
| ENSMUSGC | 12306  | Anxa2    | protein_coding | MGI Symbc | 6  |
| ENSMUSGC | 69106  | Stoml1   | protein_coding | MGI Symbc | 8  |
| ENSMUSGC | 27965  | Spg21    | protein_coding | MGI Symbc | 4  |
| ENSMUSGC | 94062  | Mrpl3    | protein_coding | MGI Symbc | 9  |
| ENSMUSGC | 75686  | Nudt16   | protein_coding | MGI Symbc | 5  |
| ENSMUSGC | 12217  | Bsn      | protein_coding | MGI Symbc | 2  |
| ENSMUSGC | 233871 | Atxn2l   | protein_coding | MGI Symbc | 6  |
| ENSMUSGC | 12509  | Cd59a    | protein_coding | MGI Symbc | 3  |
| ENSMUSGC | 216134 | Pdxk     | protein_coding | MGI Symbc | 2  |
| ENSMUSGC | 224814 | Abcc10   | protein_coding | MGI Symbc | 7  |
| ENSMUSGC | 14225  | Fkbp1a   | protein_coding | MGI Symbc | 10 |
| ENSMUSGC | 12583  | Cdo1     | protein_coding | MGI Symbc | 1  |
| ENSMUSGC | 106039 | Gga1     | protein_coding | MGI Symbc | 1  |
| ENSMUSGC | 72662  | Dis3     | protein_coding | MGI Symbc | 6  |
| ENSMUSGC | 210126 | Lpp      | protein_coding | MGI Symbc | 3  |
| ENSMUSGC | 13430  | Dnm2     | protein_coding | MGI Symbc | 14 |
| ENSMUSGC | 17095  | Lyl1     | protein_coding | MGI Symbc | 1  |
| ENSMUSGC | 217732 | Cipc     | protein_coding | MGI Symbc | 11 |
| ENSMUSGC | 12445  | Ccnd3    | protein_coding | MGI Symbc | 21 |
| ENSMUSGC | 237911 | Brip1    | protein_coding | MGI Symbc | 3  |
| ENSMUSGC | 13612  | Edil3    | protein_coding | MGI Symbc | 8  |
| ENSMUSGC | 76448  | Ppp1r18  | protein_coding | MGI Symbc | 6  |
| ENSMUSGC | 58250  | Chst11   | protein_coding | MGI Symbc | 1  |
| ENSMUSGC | 56320  | Dbn1     | protein_coding | MGI Symbc | 9  |
| ENSMUSGC | 75612  | Gns      | protein_coding | MGI Symbc | 10 |
| ENSMUSGC | 217216 | BC030867 | protein_coding | MGI Symbc | 5  |
| ENSMUSGC | 14676  | Gna15    | protein_coding | MGI Symbc | 3  |
| ENSMUSGC | 215387 | Ncaph    | protein_coding | MGI Symbc | 6  |
| ENSMUSGC | 80981  | Arl4d    | protein_coding | MGI Symbc | 1  |
| ENSMUSGC | 15442  | Hpse     | protein_coding | MGI Symbc | 2  |

|          |        |           |                |           |    |
|----------|--------|-----------|----------------|-----------|----|
| ENSMUSGC | 432486 | Gnptab    | protein_coding | MGI Symbc | 7  |
| ENSMUSGC | 20293  | Ccl12     | protein_coding | MGI Symbc | 2  |
| ENSMUSGC | 75317  | Parpbp    | protein_coding | MGI Symbc | 4  |
| ENSMUSGC | 76478  | Haus8     | protein_coding | MGI Symbc | 8  |
| ENSMUSGC | 60530  | Figl1     | protein_coding | MGI Symbc | 7  |
| ENSMUSGC | 232798 | Leng8     | protein_coding | MGI Symbc | 10 |
| ENSMUSGC | 234384 | Mpv17l2   | protein_coding | MGI Symbc | 4  |
| ENSMUSGC | 66078  | Tsen34    | protein_coding | MGI Symbc | 12 |
| ENSMUSGC | 216161 | Sbno2     | protein_coding | MGI Symbc | 9  |
| ENSMUSGC | 17279  | Melk      | protein_coding | MGI Symbc | 4  |
| ENSMUSGC | 27261  | Dok3      | protein_coding | MGI Symbc | 3  |
| ENSMUSGC | 118451 | Mrps2     | protein_coding | MGI Symbc | 3  |
| ENSMUSGC | 223752 | Gramd4    | protein_coding | MGI Symbc | 5  |
| ENSMUSGC | 226409 | Zranb3    | protein_coding | MGI Symbc | 7  |
| ENSMUSGC | 107895 | Mgat5     | protein_coding | MGI Symbc | 4  |
| ENSMUSGC | 66725  | Lrrk2     | protein_coding | MGI Symbc | 6  |
| ENSMUSGC | 140795 | P2ry14    | protein_coding | MGI Symbc | 9  |
| ENSMUSGC | 72726  | Tbcc      | protein_coding | MGI Symbc | 1  |
| ENSMUSGC | 108723 | Card11    | protein_coding | MGI Symbc | 3  |
| ENSMUSGC | 14960  | H2-Aa     | protein_coding | MGI Symbc | 4  |
| ENSMUSGC | 209737 | Kif15     | protein_coding | MGI Symbc | 17 |
| ENSMUSGC | 67455  | Klhl13    | protein_coding | MGI Symbc | 7  |
| ENSMUSGC | 171166 | Mcoln3    | protein_coding | MGI Symbc | 3  |
| ENSMUSGC | 66421  | 2410004B1 | protein_coding | MGI Symbc | 7  |
| ENSMUSGC | 327762 | Dna2      | protein_coding | MGI Symbc | 6  |
| ENSMUSGC | 12259  | C1qa      | protein_coding | MGI Symbc | 1  |
| ENSMUSGC | 12262  | C1qc      | protein_coding | MGI Symbc | 2  |
| ENSMUSGC | 54445  | Unc93b1   | protein_coding | MGI Symbc | 4  |
| ENSMUSGC | 243910 | Nfkbid    | protein_coding | MGI Symbc | 4  |
| ENSMUSGC | 11785  | Apbb1     | protein_coding | MGI Symbc | 21 |
| ENSMUSGC | 78514  | Arhgap10  | protein_coding | MGI Symbc | 3  |
| ENSMUSGC | 207839 | Galnt6    | protein_coding | MGI Symbc | 3  |
| ENSMUSGC | 21335  | Tacc3     | protein_coding | MGI Symbc | 8  |
| ENSMUSGC | 15894  | Icam1     | protein_coding | MGI Symbc | 2  |
| ENSMUSGC | 56506  | Cib2      | protein_coding | MGI Symbc | 1  |
| ENSMUSGC | 218977 | Dlgap5    | protein_coding | MGI Symbc | 9  |
| ENSMUSGC | 22057  | Tob1      | protein_coding | MGI Symbc | 1  |
| ENSMUSGC | 72391  | Cdkn3     | protein_coding | MGI Symbc | 4  |
| ENSMUSGC | 14998  | H2-DMa    | protein_coding | MGI Symbc | 2  |
| ENSMUSGC | 114874 | Ddhd1     | protein_coding | MGI Symbc | 13 |
| ENSMUSGC | 12520  | Cd81      | protein_coding | MGI Symbc | 6  |
| ENSMUSGC | 21817  | Tgm2      | protein_coding | MGI Symbc | 4  |
| ENSMUSGC | 217864 | Rcor1     | protein_coding | MGI Symbc | 2  |
| ENSMUSGC | 19401  | Rara      | protein_coding | MGI Symbc | 7  |
| ENSMUSGC | 329877 | Dennd4c   | protein_coding | MGI Symbc | 4  |
| ENSMUSGC | 218215 | Rnf144b   | protein_coding | MGI Symbc | 2  |
| ENSMUSGC | 70925  | Cdkn2aip  | protein_coding | MGI Symbc | 3  |

|          |        |           |                |           |    |
|----------|--------|-----------|----------------|-----------|----|
| ENSMUSGC | 210530 | P3h2      | protein_coding | MGI Symbc | 4  |
| ENSMUSGC | 75345  | Slamf7    | protein_coding | MGI Symbc | 5  |
| ENSMUSGC | 140742 | Sesn1     | protein_coding | MGI Symbc | 3  |
| ENSMUSGC | 22137  | Ttk       | protein_coding | MGI Symbc | 6  |
| ENSMUSGC | 69957  | Cdc16     | protein_coding | MGI Symbc | 5  |
| ENSMUSGC | 66694  | Uqcrfs1   | protein_coding | MGI Symbc | 1  |
| ENSMUSGC | 66124  | Josd2     | protein_coding | MGI Symbc | 19 |
| ENSMUSGC | 13590  | Lefty1    | protein_coding | MGI Symbc | 2  |
| ENSMUSGC | 233406 | Prc1      | protein_coding | MGI Symbc | 14 |
| ENSMUSGC | 16790  | Anpep     | protein_coding | MGI Symbc | 6  |
| ENSMUSGC | 12393  | Runx2     | protein_coding | MGI Symbc | 13 |
| ENSMUSGC | 100182 | Akna      | protein_coding | MGI Symbc | 2  |
| ENSMUSGC | 68867  | Rnf122    | protein_coding | MGI Symbc | 5  |
| ENSMUSGC | 69876  | Thap3     | protein_coding | MGI Symbc | 3  |
| ENSMUSGC | 103284 | Zc3h10    | protein_coding | MGI Symbc | 4  |
| ENSMUSGC | 329559 | Zfp335    | protein_coding | MGI Symbc | 3  |
| ENSMUSGC | 268512 | Slc26a11  | protein_coding | MGI Symbc | 4  |
| ENSMUSGC | 19219  | Ptger4    | protein_coding | MGI Symbc | 3  |
| ENSMUSGC | 235283 | Gramd1b   | protein_coding | MGI Symbc | 14 |
| ENSMUSGC | 68026  | Pclaf     | protein_coding | MGI Symbc | 3  |
| ENSMUSGC | 23890  | Gpr34     | protein_coding | MGI Symbc | 2  |
| ENSMUSGC | 407790 | Ndufa4l2  | protein_coding | MGI Symbc | 3  |
| ENSMUSGC | 17872  | Ppp1r15a  | protein_coding | MGI Symbc | 3  |
| ENSMUSGC | 574428 | Zmynd15   | protein_coding | MGI Symbc | 6  |
| ENSMUSGC | 232975 | Atp1a3    | protein_coding | MGI Symbc | 5  |
| ENSMUSGC | 16801  | Arhgef1   | protein_coding | MGI Symbc | 19 |
| ENSMUSGC | 216864 | Mgl2      | protein_coding | MGI Symbc | 5  |
| ENSMUSGC | 72754  | Arhgef10l | protein_coding | MGI Symbc | 12 |
| ENSMUSGC | 17965  | Nbl1      | protein_coding | MGI Symbc | 3  |
| ENSMUSGC | 18782  | Pla2g2d   | protein_coding | MGI Symbc | 2  |
| ENSMUSGC | 235380 | Dmxl2     | protein_coding | MGI Symbc | 8  |
| ENSMUSGC | 16543  | Mdfic     | protein_coding | MGI Symbc | 7  |
| ENSMUSGC | 268697 | Ccnb1     | protein_coding | MGI Symbc | 7  |
| ENSMUSGC | 381293 | Kif14     | protein_coding | MGI Symbc | 8  |
| ENSMUSGC | 15900  | Irf8      | protein_coding | MGI Symbc | 7  |
| ENSMUSGC | 68077  | Nop53     | protein_coding | MGI Symbc | 4  |
| ENSMUSGC | 68889  | Ubac2     | protein_coding | MGI Symbc | 4  |
| ENSMUSGC | 68875  | Tmcc2     | protein_coding | MGI Symbc | 6  |
| ENSMUSGC | 11881  | Arsb      | protein_coding | MGI Symbc | 2  |
| ENSMUSGC | 269582 | Clsn      | protein_coding | MGI Symbc | 7  |
| ENSMUSGC | 100206 | Adprhl2   | protein_coding | MGI Symbc | 4  |
| ENSMUSGC | 15199  | Hebp1     | protein_coding | MGI Symbc | 4  |
| ENSMUSGC | 20708  | Serpib6b  | protein_coding | MGI Symbc | 4  |
| ENSMUSGC | 69573  | Hilpda    | protein_coding | MGI Symbc | 2  |
| ENSMUSGC | 54199  | Ccr12     | protein_coding | MGI Symbc | 3  |
| ENSMUSGC | 14260  | Fmn1      | protein_coding | MGI Symbc | 9  |
| ENSMUSGC | 216964 | Trp53i13  | protein_coding | MGI Symbc | 5  |

|          |        |          |                |           |    |
|----------|--------|----------|----------------|-----------|----|
| ENSMUSGC | 23796  | Aplnr    | protein_coding | MGI Symbc | 2  |
| ENSMUSGC | 68813  | Dock5    | protein_coding | MGI Symbc | 3  |
| ENSMUSGC | 217835 | Rin3     | protein_coding | MGI Symbc | 7  |
| ENSMUSGC | 16613  | Klk1b11  | protein_coding | MGI Symbc | 1  |
| ENSMUSGC | 101602 | Al467606 | protein_coding | MGI Symbc | 2  |
| ENSMUSGC | 232976 | Zfp574   | protein_coding | MGI Symbc | 4  |
| ENSMUSGC | 195522 | Zfp691   | protein_coding | MGI Symbc | 4  |
| ENSMUSGC | 218454 | Lhfp12   | protein_coding | MGI Symbc | 9  |
| ENSMUSGC | 229841 | Cenpe    | protein_coding | MGI Symbc | 5  |
| ENSMUSGC | 244237 | Tnfrsf26 | protein_coding | MGI Symbc | 2  |
| ENSMUSGC | 67020  | Tmem88   | protein_coding | MGI Symbc | 1  |
| ENSMUSGC | 11555  | Adrb2    | protein_coding | MGI Symbc | 1  |
| ENSMUSGC | 56844  | Tssc4    | protein_coding | MGI Symbc | 8  |
| ENSMUSGC | 233893 | Zfp764   | protein_coding | MGI Symbc | 2  |
| ENSMUSGC | 319675 | Cep295   | protein_coding | MGI Symbc | 14 |
| ENSMUSGC | 108961 | E2f8     | protein_coding | MGI Symbc | 4  |
| ENSMUSGC | 235505 | Cd109    | protein_coding | MGI Symbc | 2  |
| ENSMUSGC | 217517 | Stxbp6   | protein_coding | MGI Symbc | 6  |
| ENSMUSGC | 73708  | Dppa3    | protein_coding | MGI Symbc | 2  |
| ENSMUSGC | 19659  | Rbp1     | protein_coding | MGI Symbc | 1  |
| ENSMUSGC | 224093 | Fam43a   | protein_coding | MGI Symbc | 1  |
| ENSMUSGC | 232431 | Gprc5a   | protein_coding | MGI Symbc | 1  |
| ENSMUSGC | 17476  | Mpeg1    | protein_coding | MGI Symbc | 1  |
| ENSMUSGC | 211949 | Spsb4    | protein_coding | MGI Symbc | 4  |
| ENSMUSGC | 268749 | Rnf31    | protein_coding | MGI Symbc | 7  |
| ENSMUSGC | 12484  | Cd24a    | protein_coding | MGI Symbc | 3  |
| ENSMUSGC | 75219  | Dusp18   | protein_coding | MGI Symbc | 2  |
| ENSMUSGC | 217653 | Mis18bp1 | protein_coding | MGI Symbc | 8  |
| ENSMUSGC | 74325  | Cltb     | protein_coding | MGI Symbc | 4  |
| ENSMUSGC | 73683  | Atg16l2  | protein_coding | MGI Symbc | 17 |
| ENSMUSGC | 246746 | Cd300lf  | protein_coding | MGI Symbc | 7  |
| ENSMUSGC | 23966  | Tenm4    | protein_coding | MGI Symbc | 12 |
| ENSMUSGC | 12495  | Entpd1   | protein_coding | MGI Symbc | 11 |
| ENSMUSGC | 213573 | Cracr2b  | protein_coding | MGI Symbc | 9  |
| ENSMUSGC | 67702  | Rnf149   | protein_coding | MGI Symbc | 4  |
| ENSMUSGC | 70466  | Ckap2l   | protein_coding | MGI Symbc | 1  |
| ENSMUSGC | 107305 | Vps37c   | protein_coding | MGI Symbc | 1  |
| ENSMUSGC | 192231 | Hexim1   | protein_coding | MGI Symbc | 1  |
| ENSMUSGC | 107771 | Bmyc     | protein_coding | MGI Symbc | 1  |
| ENSMUSGC | 242297 | Fam110b  | protein_coding | MGI Symbc | 9  |
| ENSMUSGC | 72454  | Ccdc71   | protein_coding | MGI Symbc | 3  |
| ENSMUSGC | 17381  | Mmp12    | protein_coding | MGI Symbc | 7  |
| ENSMUSGC | 268857 | Nlrc3    | protein_coding | MGI Symbc | 4  |
| ENSMUSGC | 229323 | Gpr171   | protein_coding | MGI Symbc | 1  |
| ENSMUSGC | 244418 | Prag1    | protein_coding | MGI Symbc | 3  |
| ENSMUSGC | 16854  | Lgals3   | protein_coding | MGI Symbc | 6  |
| ENSMUSGC | 97130  | C77080   | protein_coding | MGI Symbc | 5  |

|             |        |          |                |           |    |
|-------------|--------|----------|----------------|-----------|----|
| ENSMUSGC    | 17386  | Mmp13    | protein_coding | MGI Symbc | 1  |
| ENSMUSGC    | 263764 | Creg2    | protein_coding | MGI Symbc | 1  |
| ENSMUSGC    | 78286  | Nav2     | protein_coding | MGI Symbc | 18 |
| ENSMUSGC    | 16477  | Junb     | protein_coding | MGI Symbc | 2  |
| ENSMUSGC    | 68318  | Aph1c    | protein_coding | MGI Symbc | 2  |
| ENSMUSGC    | 12702  | Socs3    | protein_coding | MGI Symbc | 3  |
| ENSMUSGC    | 11668  | Aldh1a1  | protein_coding | MGI Symbc | 6  |
| ENSMUSGC    | 19342  | Rab4b    | protein_coding | MGI Symbc | 8  |
| ENSMUSGC    | 207818 | Smagp    | protein_coding | MGI Symbc | 2  |
| ENSMUSGC    | 15936  | Ier2     | protein_coding | MGI Symbc | 1  |
| ENSMUSGC    | 100494 | Zfand2a  | protein_coding | MGI Symbc | 5  |
| ENSMUSGC    | 16891  | Lipg     | protein_coding | MGI Symbc | 1  |
| ENSMUSGC    | 60440  | ligp1    | protein_coding | MGI Symbc | 2  |
| ENSMUSGC    | 16880  | Lifr     | protein_coding | MGI Symbc | 8  |
| ENSMUSGC    | 231633 | Tmem119  | protein_coding | MGI Symbc | 2  |
| ENSMUSGC    | 223881 | Rnd1     | protein_coding | MGI Symbc | 3  |
| ENSMUSGC    | 74901  | Kbtbd11  | protein_coding | MGI Symbc | 4  |
| ENSMUSGC    | 16881  | Lig1     | protein_coding | MGI Symbc | 12 |
| ENSMUSGC    | 320782 | Tmem154  | protein_coding | MGI Symbc | 4  |
| ENSMUSGC    | 15364  | Hmga2    | protein_coding | MGI Symbc | 3  |
| ENSMUSGC    | 382090 | Cep162   | protein_coding | MGI Symbc | 4  |
| ENSMUSGC    | 381801 | Tatdn2   | protein_coding | MGI Symbc | 5  |
| ENSMUSGC    | 13591  | Ebf1     | protein_coding | MGI Symbc | 7  |
| ENSMUSGC    | 327957 | Scimp    | protein_coding | MGI Symbc | 2  |
| ENSMUSGC    | 231532 | Arhgap24 | protein_coding | MGI Symbc | 8  |
| ENSMUSGC    | 76936  | Hnrnpm   | protein_coding | MGI Symbc | 8  |
| ENSMUSGC    | 108052 | Slc14a1  | protein_coding | MGI Symbc | 3  |
| ENSMUSGC    | 11936  | Fxyd2    | protein_coding | MGI Symbc | 13 |
| ENSMUSGC    | 110196 | Fdps     | protein_coding | MGI Symbc | 7  |
| ENSMUSGC    | 19245  | Ptp4a3   | protein_coding | MGI Symbc | 4  |
| ENSMUSGC    | 14784  | Grb2     | protein_coding | MGI Symbc | 5  |
| ENSMUSGC    | 16554  | Kif13b   | protein_coding | MGI Symbc | 5  |
| ENSMUSGC    | 232440 | H2afj    | protein_coding | MGI Symbc | 2  |
| ENSMUSGC    | 241633 | Atp8b4   | protein_coding | MGI Symbc | 5  |
| ENSMUSGC    | 14969  | H2-Eb1   | protein_coding | MGI Symbc | 1  |
| ENSMUSGC    | 22260  | Nr1h2    | protein_coding | MGI Symbc | 18 |
| ENSMUSGC    | 329679 | Fnip2    | protein_coding | MGI Symbc | 6  |
| ENSMUSGC    | 20315  | Cxcl12   | protein_coding | MGI Symbc | 4  |
| ENSMUSGC    | 66569  | Gdpd1    | protein_coding | MGI Symbc | 1  |
| ENSMUSGC    | 18655  | Pgk1     | protein_coding | MGI Symbc | 3  |
| ENSMUSGC    | 239849 | Cd200r4  | protein_coding | MGI Symbc | 3  |
| ENSMUSGC    | 74868  | Tmem65   | protein_coding | MGI Symbc | 2  |
| ENSMUSGC    | 239027 | Arhgap22 | protein_coding | MGI Symbc | 8  |
| ENSMUSGC NA |        | Gm10134  | protein_coding | MGI Symbc | 1  |
| ENSMUSGC    | 66079  | Tmem42   | protein_coding | MGI Symbc | 4  |
| ENSMUSGC    | 70381  | Tecpr1   | protein_coding | MGI Symbc | 12 |
| ENSMUSGC    | 277414 | Trp53i11 | protein_coding | MGI Symbc | 8  |

|             |        |           |                        |           |    |
|-------------|--------|-----------|------------------------|-----------|----|
| ENSMUSGC    | 20661  | Sort1     | protein_coding         | MGI Symbc | 3  |
| ENSMUSGC    | 70385  | Spdl1     | protein_coding         | MGI Symbc | 3  |
| ENSMUSGC    | 234911 | Mmp27     | protein_coding         | MGI Symbc | 3  |
| ENSMUSGC    | 75690  | Vsig10l   | protein_coding         | MGI Symbc | 5  |
| ENSMUSGC    | 232801 | Lilra5    | protein_coding         | MGI Symbc | 1  |
| ENSMUSGC    | 234094 | Arhgef10  | protein_coding         | MGI Symbc | 7  |
| ENSMUSGC    | 70021  | Nt5dc2    | protein_coding         | MGI Symbc | 6  |
| ENSMUSGC    | 12609  | Cebpd     | protein_coding         | MGI Symbc | 2  |
| ENSMUSGC    | 12983  | Csf2rb    | protein_coding         | MGI Symbc | 1  |
| ENSMUSGC NA |        | Ahnak2    | protein_coding         | MGI Symbc | 4  |
| ENSMUSGC NA |        | Dnmt3aos  | antisense_RNA          | MGI Symbc | 1  |
| ENSMUSGC    | 14961  | H2-Ab1    | protein_coding         | MGI Symbc | 3  |
| ENSMUSGC    | 545378 | Sh2d1b2   | protein_coding         | MGI Symbc | 2  |
| ENSMUSGC    | 69368  | Wdfy1     | protein_coding         | MGI Symbc | 14 |
| ENSMUSGC    | 241112 | Catip     | protein_coding         | MGI Symbc | 4  |
| ENSMUSGC    | 241062 | Pgap1     | protein_coding         | MGI Symbc | 4  |
| ENSMUSGC    | 1E+08  | Gm14548   | protein_coding         | MGI Symbc | 1  |
| ENSMUSGC    | 54712  | Plxnc1    | protein_coding         | MGI Symbc | 5  |
| ENSMUSGC    | 114679 | Selenom   | protein_coding         | MGI Symbc | 3  |
| ENSMUSGC NA |        | Gm23935   | miRNA                  | MGI Symbc | 1  |
| ENSMUSGC NA |        | Ighm      | IG_C_gene              | MGI Symbc | 2  |
| ENSMUSGC    | 1E+08  | Tgtp2     | protein_coding         | MGI Symbc | 2  |
| ENSMUSGC    | 14999  | H2-DMb1   | protein_coding         | MGI Symbc | 2  |
| ENSMUSGC    | 277203 | Tm4sf19   | protein_coding         | MGI Symbc | 1  |
| ENSMUSGC    | 77777  | Ulbp1     | protein_coding         | MGI Symbc | 5  |
| ENSMUSGC NA |        | Gm12551   | unprocessed_pseudogene | MGI Symbc | 1  |
| ENSMUSGC NA |        | Gm14032   | processed_pseudogene   | MGI Symbc | 1  |
| ENSMUSGC    | 56464  | Ctsf      | protein_coding         | MGI Symbc | 1  |
| ENSMUSGC NA |        | 4930430E1 | antisense_RNA          | MGI Symbc | 2  |
| ENSMUSGC NA |        | Gm15728   | lincRNA                | MGI Symbc | 2  |
| ENSMUSGC NA |        | Gm13391   | lincRNA                | MGI Symbc | 2  |
| ENSMUSGC NA |        | 2010013B2 | lincRNA                | MGI Symbc | 1  |
| ENSMUSGC NA |        | Gm13710   | lincRNA                | MGI Symbc | 2  |
| ENSMUSGC NA |        | Gm15523   | antisense_RNA          | MGI Symbc | 1  |
| ENSMUSGC NA |        | Gm17056   | antisense_RNA          | MGI Symbc | 1  |
| ENSMUSGC    | 381823 | Apold1    | protein_coding         | MGI Symbc | 1  |
| ENSMUSGC NA |        | Gm20513   | lincRNA                | MGI Symbc | 1  |
| ENSMUSGC    | 668101 | Sirpb1b   | protein_coding         | MGI Symbc | 4  |
| ENSMUSGC    | 666907 | Ms4a4a    | protein_coding         | MGI Symbc | 1  |

| description                                                                                              | logFC     | fold-change |
|----------------------------------------------------------------------------------------------------------|-----------|-------------|
| cyclin D2 [Source:MGI Symbol;Acc:MGI:88314]                                                              | 8.85E-01  | -1.85       |
| serine (or cysteine) peptidase inhibitor, clade F, member 1 [Source:MGI Symbol;Acc:MGI:1913761]          | 1.47E+00  | -2.77       |
| chromatin target of PRMT1 [Source:MGI Symbol;Acc:MGI:1913761]                                            | 6.23E-01  | -1.54       |
| major facilitator superfamily domain containing 10 [Source:MGI Symbol;Acc:MGI:1913761]                   | 6.93E-01  | -1.62       |
| ubiquitin-like, containing PHD and RING finger domains, 1 [Source:MGI Symbol;Acc:MGI:1913761]            | -1.20E+00 | 2.30        |
| acid phosphatase 5, tartrate resistant [Source:MGI Symbol;Acc:MGI:87883]                                 | -7.13E-01 | 1.64        |
| differentially expressed in FDCP 8 [Source:MGI Symbol;Acc:MGI:1346331]                                   | -5.93E-01 | 1.51        |
| mesenchyme homeobox 1 [Source:MGI Symbol;Acc:MGI:103220]                                                 | 2.34E+00  | -5.07       |
| forkhead box M1 [Source:MGI Symbol;Acc:MGI:1347487]                                                      | -1.04E+00 | 2.05        |
| pregnancy upregulated non-ubiquitously expressed CaM kinase [Source:MGI Symbol;Acc:MGI:1927470]          | 7.74E-01  | -1.71       |
| sperm associated antigen 5 [Source:MGI Symbol;Acc:MGI:1927470]                                           | -1.08E+00 | 2.11        |
| nuclear receptor subfamily 1, group H, member 3 [Source:MGI Symbol;Acc:MGI:1927470]                      | -9.28E-01 | 1.90        |
| spleen focus forming virus (SFFV) proviral integration oncogene [Source:MGI Symbol;Acc:MGI:1347244]      | 1.46E+00  | -2.76       |
| AXL receptor tyrosine kinase [Source:MGI Symbol;Acc:MGI:1347244]                                         | 7.78E-01  | -1.71       |
| coiled-coil domain containing 97 [Source:MGI Symbol;Acc:MGI:1196455]                                     | 6.79E-01  | -1.60       |
| autophagy related 4D, cysteine peptidase [Source:MGI Symbol;Acc:MGI:2444308]                             | 9.82E-01  | -1.98       |
| chromatin assembly factor 1, subunit A (p150) [Source:MGI Symbol;Acc:MGI:1351111]                        | -1.31E+00 | 2.48        |
| cleft lip and palate associated transmembrane protein 1 [Source:MGI Symbol;Acc:MGI:88057]                | 7.52E-01  | -1.68       |
| apolipoprotein E [Source:MGI Symbol;Acc:MGI:88057]                                                       | 8.71E-01  | -1.83       |
| cyclin-dependent kinase inhibitor 1B [Source:MGI Symbol;Acc:MGI:104565]                                  | 6.76E-01  | -1.60       |
| protein phosphatase 5, catalytic subunit [Source:MGI Symbol;Acc:MGI:102666]                              | 6.04E-01  | -1.52       |
| lipase, hormone sensitive [Source:MGI Symbol;Acc:MGI:96790]                                              | 8.92E-01  | -1.86       |
| phospholipase D family, member 3 [Source:MGI Symbol;Acc:MGI:1333782]                                     | -8.32E-01 | 1.78        |
| ring finger protein 215 [Source:MGI Symbol;Acc:MGI:1918923]                                              | 9.28E-01  | -1.90       |
| ceruloplasmin [Source:MGI Symbol;Acc:MGI:88476]                                                          | 7.99E-01  | -1.74       |
| kinesin family member 20A [Source:MGI Symbol;Acc:MGI:1201682]                                            | -7.82E-01 | 1.72        |
| interleukin 7 receptor [Source:MGI Symbol;Acc:MGI:96562]                                                 | -1.62E+00 | 3.08        |
| mitogen-activated protein kinase kinase kinase 11 [Source:MGI Symbol;Acc:MGI:1341111]                    | 1.08E+00  | -2.11       |
| Spi-C transcription factor (Spi-1/PU.1 related) [Source:MGI Symbol;Acc:MGI:1341111]                      | 7.52E-01  | -1.68       |
| sarcoglycan, epsilon [Source:MGI Symbol;Acc:MGI:1329042]                                                 | 1.04E+00  | -2.06       |
| lymphocyte antigen 9 [Source:MGI Symbol;Acc:MGI:96885]                                                   | -6.83E-01 | 1.61        |
| chemokine (C-C motif) ligand 24 [Source:MGI Symbol;Acc:MGI:1928953]                                      | 9.75E-01  | -1.97       |
| N-myc downstream regulated gene 1 [Source:MGI Symbol;Acc:MGI:1341799]                                    | -1.10E+00 | 2.15        |
| minichromosome maintenance complex component 5 [Source:MGI Symbol;Acc:MGI:1914111]                       | -7.98E-01 | 1.74        |
| anti-silencing function 1B histone chaperone [Source:MGI Symbol;Acc:MGI:1914111]                         | -8.35E-01 | 1.78        |
| DnaJ heat shock protein family (Hsp40) member B1 [Source:MGI Symbol;Acc:MGI:1914111]                     | 6.32E-01  | -1.55       |
| MRV integration site 1 [Source:MGI Symbol;Acc:MGI:1338023]                                               | 1.03E+00  | -2.04       |
| adenosine monophosphate deaminase 3 [Source:MGI Symbol;Acc:MGI:1096344]                                  | -6.49E-01 | 1.57        |
| matrix metalloproteinase 8 [Source:MGI Symbol;Acc:MGI:1202395]                                           | -2.34E+00 | 5.07        |
| HtrA serine peptidase 1 [Source:MGI Symbol;Acc:MGI:1929076]                                              | -2.03E+00 | 4.07        |
| gamma-glutamyltransferase 5 [Source:MGI Symbol;Acc:MGI:1346063]                                          | 7.81E-01  | -1.72       |
| progesterone receptor membrane component 1 [Source:MGI Symbol;Acc:MGI:185901]                            | 6.18E-01  | -1.53       |
| NMDA receptor synaptonuclear signaling and neuronal migration factor [Source:MGI Symbol;Acc:MGI:1927344] | 7.01E-01  | -1.63       |
| geminin [Source:MGI Symbol;Acc:MGI:1927344]                                                              | -7.55E-01 | 1.69        |
| abhydrolase domain containing 16A [Source:MGI Symbol;Acc:MGI:99476]                                      | 7.98E-01  | -1.74       |
| dimethylarginine dimethylaminohydrolase 2 [Source:MGI Symbol;Acc:MGI:185901]                             | 9.74E-01  | -1.96       |

|                                                                                       |           |       |
|---------------------------------------------------------------------------------------|-----------|-------|
| polymerase (DNA directed), epsilon [Source:MGI Symbol;Acc:MGI:1196391]                | -1.16E+00 | 2.23  |
| protocadherin alpha 11 [Source:MGI Symbol;Acc:MGI:1298372]                            | 1.46E+00  | -2.75 |
| coiled-coil domain containing 124 [Source:MGI Symbol;Acc:MGI:1916403]                 | 7.06E-01  | -1.63 |
| aldehyde dehydrogenase 16 family, member A1 [Source:MGI Symbol;Acc:MGI:191            | 8.79E-01  | -1.84 |
| inhibitor of DNA binding 3 [Source:MGI Symbol;Acc:MGI:96398]                          | 9.03E-01  | -1.87 |
| cathepsin D [Source:MGI Symbol;Acc:MGI:88562]                                         | -1.25E+00 | 2.37  |
| Mid1 interacting protein 1 (gastrulation specific G12-like (zebrafish)) [Source:MGI : | 6.51E-01  | -1.57 |
| RELT tumor necrosis factor receptor [Source:MGI Symbol;Acc:MGI:2443373]               | 1.09E+00  | -2.14 |
| SERTA domain containing 1 [Source:MGI Symbol;Acc:MGI:1913438]                         | 7.72E-01  | -1.71 |
| microsomal glutathione S-transferase 1 [Source:MGI Symbol;Acc:MGI:1913850]            | -7.28E-01 | 1.66  |
| nuclear factor I/B [Source:MGI Symbol;Acc:MGI:103188]                                 | 2.02E+00  | -4.05 |
| CD163 antigen [Source:MGI Symbol;Acc:MGI:2135946]                                     | 9.85E-01  | -1.98 |
| Ewing sarcoma breakpoint region 1 [Source:MGI Symbol;Acc:MGI:99960]                   | 6.35E-01  | -1.55 |
| hyaluronoglucosaminidase 1 [Source:MGI Symbol;Acc:MGI:96298]                          | -7.00E-01 | 1.62  |
| mucolipin 2 [Source:MGI Symbol;Acc:MGI:1915529]                                       | -1.27E+00 | 2.42  |
| a disintegrin and metallopeptidase domain 19 (meltrin beta) [Source:MGI Symbol;       | 7.01E-01  | -1.63 |
| zinc finger protein 296 [Source:MGI Symbol;Acc:MGI:1926956]                           | 1.89E+00  | -3.70 |
| kinesin family member 11 [Source:MGI Symbol;Acc:MGI:1098231]                          | -8.81E-01 | 1.84  |
| SH3 binding domain protein 5 like [Source:MGI Symbol;Acc:MGI:1933124]                 | 7.26E-01  | -1.65 |
| transient receptor potential cation channel, subfamily V, member 4 [Source:MGI S      | 7.13E-01  | -1.64 |
| ankyrin repeat domain 28 [Source:MGI Symbol;Acc:MGI:2145661]                          | -6.92E-01 | 1.62  |
| DnaJ heat shock protein family (Hsp40) member B9 [Source:MGI Symbol;Acc:MGI:          | 6.00E-01  | -1.52 |
| zinc finger, DHHC domain containing 12 [Source:MGI Symbol;Acc:MGI:1913470]            | -6.24E-01 | 1.54  |
| non-SMC condensin I complex, subunit G [Source:MGI Symbol;Acc:MGI:1930197]            | -1.14E+00 | 2.21  |
| leucine rich repeat containing 27 [Source:MGI Symbol;Acc:MGI:1923862]                 | -2.18E+00 | 4.52  |
| StAR-related lipid transfer (START) domain containing 13 [Source:MGI Symbol;Acc:      | 1.13E+00  | -2.19 |
| CD274 antigen [Source:MGI Symbol;Acc:MGI:1926446]                                     | -8.58E-01 | 1.81  |
| interleukin 13 receptor, alpha 1 [Source:MGI Symbol;Acc:MGI:105052]                   | 5.93E-01  | -1.51 |
| breast cancer 1, early onset [Source:MGI Symbol;Acc:MGI:104537]                       | -1.28E+00 | 2.44  |
| plexin domain containing 1 [Source:MGI Symbol;Acc:MGI:1919574]                        | -9.92E-01 | 1.99  |
| C1q and tumor necrosis factor related protein 1 [Source:MGI Symbol;Acc:MGI:191        | 1.50E+00  | -2.83 |
| ras homolog family member T1 [Source:MGI Symbol;Acc:MGI:1926078]                      | 6.52E-01  | -1.57 |
| baculoviral IAP repeat-containing 5 [Source:MGI Symbol;Acc:MGI:1203517]               | -9.41E-01 | 1.92  |
| matrix metallopeptidase 9 [Source:MGI Symbol;Acc:MGI:97011]                           | 2.20E+00  | -4.61 |
| Ca2+-dependent activator protein for secretion 2 [Source:MGI Symbol;Acc:MGI:24        | 6.24E-01  | -1.54 |
| RAS-related C3 botulinum substrate 3 [Source:MGI Symbol;Acc:MGI:2180784]              | 1.33E+00  | -2.51 |
| v-maf musculoaponeurotic fibrosarcoma oncogene family, protein K (avian) [Sourc       | 7.20E-01  | -1.65 |
| glutathione peroxidase 3 [Source:MGI Symbol;Acc:MGI:105102]                           | -1.12E+00 | 2.17  |
| Sp2 transcription factor [Source:MGI Symbol;Acc:MGI:1926162]                          | 6.55E-01  | -1.58 |
| secernin 1 [Source:MGI Symbol;Acc:MGI:1917188]                                        | 2.20E+00  | -4.58 |
| GIPC PDZ domain containing family, member 1 [Source:MGI Symbol;Acc:MGI:1926           | 8.28E-01  | -1.78 |
| cell division cycle 37 [Source:MGI Symbol;Acc:MGI:109531]                             | 6.18E-01  | -1.53 |
| glycogenin [Source:MGI Symbol;Acc:MGI:1351614]                                        | -1.11E+00 | 2.15  |
| solute carrier family 6 (neurotransmitter transporter, creatine), member 8 [Source    | -1.10E+00 | 2.14  |
| lysosomal trafficking regulator [Source:MGI Symbol;Acc:MGI:107448]                    | -9.96E-01 | 1.99  |
| F-box protein 5 [Source:MGI Symbol;Acc:MGI:1914391]                                   | -1.03E+00 | 2.04  |
| centrosomal protein 57-like 1 [Source:MGI Symbol;Acc:MGI:1915511]                     | -6.85E-01 | 1.61  |



|                                                                                                      |           |       |
|------------------------------------------------------------------------------------------------------|-----------|-------|
| cyclin-dependent kinase 1 [Source:MGI Symbol;Acc:MGI:88351]                                          | -1.15E+00 | 2.22  |
| serum/glucocorticoid regulated kinase 1 [Source:MGI Symbol;Acc:MGI:1340062]                          | -6.40E-01 | 1.56  |
| vanin 3 [Source:MGI Symbol;Acc:MGI:1347055]                                                          | 9.79E-01  | -1.97 |
| phosphatase domain containing, paladin 1 [Source:MGI Symbol;Acc:MGI:1351623]                         | 7.47E-01  | -1.68 |
| DNA-damage-inducible transcript 4 [Source:MGI Symbol;Acc:MGI:1921997]                                | 1.84E+00  | -3.59 |
| E2F transcription factor 7 [Source:MGI Symbol;Acc:MGI:1289147]                                       | -1.73E+00 | 3.33  |
| oxysterol binding protein-like 8 [Source:MGI Symbol;Acc:MGI:2443807]                                 | -1.08E+00 | 2.12  |
| pleckstrin homology like domain, family A, member 1 [Source:MGI Symbol;Acc:MGI:104912]               | 5.89E-01  | -1.50 |
| splicing factor 3a, subunit 2 [Source:MGI Symbol;Acc:MGI:104912]                                     | 1.09E+00  | -2.12 |
| rhomboïd 5 homolog 1 [Source:MGI Symbol;Acc:MGI:104328]                                              | 1.03E+00  | -2.04 |
| hyaluronan mediated motility receptor (RHAMM) [Source:MGI Symbol;Acc:MGI:104328]                     | -1.00E+00 | 2.00  |
| cytoplasmic FMR1 interacting protein 2 [Source:MGI Symbol;Acc:MGI:1924134]                           | -9.90E-01 | 1.99  |
| PDZ and LIM domain 4 [Source:MGI Symbol;Acc:MGI:1353470]                                             | 7.23E-01  | -1.65 |
| spindle and kinetochore associated complex subunit 2 [Source:MGI Symbol;Acc:MGI:104750]              | -6.46E-01 | 1.56  |
| neuronal cell adhesion molecule [Source:MGI Symbol;Acc:MGI:104750]                                   | -3.32E+00 | 9.99  |
| ribonucleotide reductase M2 [Source:MGI Symbol;Acc:MGI:98181]                                        | -1.10E+00 | 2.15  |
| DNA methyltransferase 3A [Source:MGI Symbol;Acc:MGI:1261827]                                         | -9.52E-01 | 1.94  |
| Fas (TNFRSF6) binding factor 1 [Source:MGI Symbol;Acc:MGI:1922033]                                   | 1.06E+00  | -2.09 |
| PICALM interacting mitotic regulator [Source:MGI Symbol;Acc:MGI:1924434]                             | -7.63E-01 | 1.70  |
| cytoglobin [Source:MGI Symbol;Acc:MGI:2149481]                                                       | 1.47E+00  | -2.77 |
| topoisomerase (DNA) II alpha [Source:MGI Symbol;Acc:MGI:98790]                                       | -9.94E-01 | 1.99  |
| stonin 2 [Source:MGI Symbol;Acc:MGI:1918272]                                                         | 1.00E+00  | -2.00 |
| liver glycogen phosphorylase [Source:MGI Symbol;Acc:MGI:97829]                                       | -8.06E-01 | 1.75  |
| reticulum 1 [Source:MGI Symbol;Acc:MGI:1933947]                                                      | 1.05E+00  | -2.06 |
| arginase type II [Source:MGI Symbol;Acc:MGI:1330806]                                                 | -1.24E+00 | 2.35  |
| zinc finger protein 36, C3H type-like 1 [Source:MGI Symbol;Acc:MGI:107946]                           | 9.28E-01  | -1.90 |
| EF-hand calcium binding domain 11 [Source:MGI Symbol;Acc:MGI:1926017]                                | -1.61E+00 | 3.05  |
| ankyrin repeat and SOCS box-containing 2 [Source:MGI Symbol;Acc:MGI:1929743]                         | 1.97E+00  | -3.92 |
| transforming growth factor, beta 3 [Source:MGI Symbol;Acc:MGI:98727]                                 | 9.68E-01  | -1.96 |
| farnesyl diphosphate farnesyl transferase 1 [Source:MGI Symbol;Acc:MGI:102706]                       | -6.65E-01 | 1.59  |
| tumor necrosis factor, alpha-induced protein 2 [Source:MGI Symbol;Acc:MGI:104912]                    | -9.61E-01 | 1.95  |
| glucosaminyl (N-acetyl) transferase 2, I-branching enzyme [Source:MGI Symbol;Acc:MGI:1924134]        | -7.11E-01 | 1.64  |
| male germ cell-associated kinase [Source:MGI Symbol;Acc:MGI:96913]                                   | -2.77E+00 | 6.83  |
| PX domain containing 1 [Source:MGI Symbol;Acc:MGI:1914145]                                           | 9.39E-01  | -1.92 |
| growth arrest and DNA-damage-inducible 45 gamma [Source:MGI Symbol;Acc:MGI:1924134]                  | 1.14E+00  | -2.21 |
| AU RNA binding protein/enoyl-coenzyme A hydratase [Source:MGI Symbol;Acc:MGI:1924134]                | 6.80E-01  | -1.60 |
| thioredoxin domain containing 15 [Source:MGI Symbol;Acc:MGI:1916922]                                 | 6.51E-01  | -1.57 |
| centrosomal protein 72 [Source:MGI Symbol;Acc:MGI:1921720]                                           | -8.38E-01 | 1.79  |
| multiple C2 domains, transmembrane 1 [Source:MGI Symbol;Acc:MGI:1926021]                             | -7.41E-01 | 1.67  |
| thyroid hormone receptor beta [Source:MGI Symbol;Acc:MGI:98743]                                      | 1.60E+00  | -3.02 |
| TSC22 domain family, member 1 [Source:MGI Symbol;Acc:MGI:109127]                                     | 7.55E-01  | -1.69 |
| diaphanous related formin 3 [Source:MGI Symbol;Acc:MGI:1927222]                                      | -1.02E+00 | 2.03  |
| PDZ binding kinase [Source:MGI Symbol;Acc:MGI:1289156]                                               | -1.30E+00 | 2.46  |
| establishment of sister chromatid cohesion N-acetyltransferase 2 [Source:MGI Symbol;Acc:MGI:1924134] | -1.12E+00 | 2.18  |
| complement component 6 [Source:MGI Symbol;Acc:MGI:88233]                                             | 2.81E+00  | -7.00 |
| carboxymethylenebutenolidase-like (Pseudomonas) [Source:MGI Symbol;Acc:MGI:1917904]                  | -1.82E+00 | 3.53  |
| ankyrin repeat domain 33B [Source:MGI Symbol;Acc:MGI:1917904]                                        | -7.05E-01 | 1.63  |

|                                                                                            |           |       |
|--------------------------------------------------------------------------------------------|-----------|-------|
| catenin (cadherin associated protein), delta 2 [Source:MGI Symbol;Acc:MGI:11959            | -7.50E-01 | 1.68  |
| alpha-methylacyl-CoA racemase [Source:MGI Symbol;Acc:MGI:1098273]                          | 7.51E-01  | -1.68 |
| low density lipoprotein-related protein 12 [Source:MGI Symbol;Acc:MGI:2443132]             | -8.90E-01 | 1.85  |
| F-box protein 32 [Source:MGI Symbol;Acc:MGI:1914981]                                       | -9.10E-01 | 1.88  |
| ATPase family, AAA domain containing 2 [Source:MGI Symbol;Acc:MGI:1917722]                 | -5.85E-01 | 1.50  |
| collagen, type XIV, alpha 1 [Source:MGI Symbol;Acc:MGI:1341272]                            | 9.93E-01  | -1.99 |
| G two S phase expressed protein 1 [Source:MGI Symbol;Acc:MGI:1352755]                      | -7.59E-01 | 1.69  |
| synaptogyrin 1 [Source:MGI Symbol;Acc:MGI:1328323]                                         | -6.66E-01 | 1.59  |
| SH3-domain binding protein 1 [Source:MGI Symbol;Acc:MGI:104603]                            | 9.75E-01  | -1.97 |
| tumor necrosis factor receptor superfamily, member 17 [Source:MGI Symbol;Acc:MGI:108445]   | 1.01E+00  | -2.02 |
| class II transactivator [Source:MGI Symbol;Acc:MGI:108445]                                 | 1.13E+00  | -2.19 |
| hairy and enhancer of split 1 (Drosophila) [Source:MGI Symbol;Acc:MGI:104853]              | 1.09E+00  | -2.12 |
| MAF1 homolog, negative regulator of RNA polymerase III [Source:MGI Symbol;Acc:MGI:1277961] | 7.25E-01  | -1.65 |
| plectin [Source:MGI Symbol;Acc:MGI:1277961]                                                | -5.90E-01 | 1.50  |
| activity regulated cytoskeletal-associated protein [Source:MGI Symbol;Acc:MGI:88           | 1.85E+00  | -3.61 |
| activated leukocyte cell adhesion molecule [Source:MGI Symbol;Acc:MGI:1313266]             | -1.03E+00 | 2.04  |
| germinal center associated, signaling and motility [Source:MGI Symbol;Acc:MGI:10           | -4.14E+00 | 17.65 |
| CD200 receptor 1 [Source:MGI Symbol;Acc:MGI:1889024]                                       | -9.15E-01 | 1.89  |
| ST3 beta-galactoside alpha-2,3-sialyltransferase 6 [Source:MGI Symbol;Acc:MGI:18           | 1.17E+00  | -2.25 |
| stromal cell-derived factor 2-like 1 [Source:MGI Symbol;Acc:MGI:2149842]                   | 7.62E-01  | -1.70 |
| leishmanolysin-like (metallopeptidase M8 family) [Source:MGI Symbol;Acc:MGI:24             | -1.35E+00 | 2.54  |
| DNA segment, Chr 16, ERATO Doi 472, expressed [Source:MGI Symbol;Acc:MGI:11                | 7.21E-01  | -1.65 |
| replication factor C (activator 1) 4 [Source:MGI Symbol;Acc:MGI:2146571]                   | -7.90E-01 | 1.73  |
| immunoglobulin-like domain containing receptor 1 [Source:MGI Symbol;Acc:MGI:2              | 1.02E+00  | -2.03 |
| chromatin assembly factor 1, subunit B (p60) [Source:MGI Symbol;Acc:MGI:13148              | -9.85E-01 | 1.98  |
| lactalbumin, alpha [Source:MGI Symbol;Acc:MGI:96742]                                       | 1.38E+00  | -2.61 |
| Rac GTPase-activating protein 1 [Source:MGI Symbol;Acc:MGI:1349423]                        | -6.52E-01 | 1.57  |
| SWI/SNF related, matrix associated, actin dependent regulator of chromatin, subfa          | -7.19E-01 | 1.65  |
| chemokine (C-X-C motif) ligand 13 [Source:MGI Symbol;Acc:MGI:1888499]                      | 1.60E+00  | -3.04 |
| prolyl 3-hydroxylase 3 [Source:MGI Symbol;Acc:MGI:1315208]                                 | -1.11E+00 | 2.16  |
| CD4 antigen [Source:MGI Symbol;Acc:MGI:88335]                                              | -1.50E+00 | 2.84  |
| POC1 centriolar protein A [Source:MGI Symbol;Acc:MGI:1917485]                              | -7.19E-01 | 1.65  |
| thyroid hormone receptor interactor 6 [Source:MGI Symbol;Acc:MGI:1343458]                  | 1.07E+00  | -2.10 |
| transmembrane protein 176A [Source:MGI Symbol;Acc:MGI:1913308]                             | 1.03E+00  | -2.04 |
| cell division cycle associated 3 [Source:MGI Symbol;Acc:MGI:1315198]                       | -7.83E-01 | 1.72  |
| phosphatidylinositol glycan anchor biosynthesis, class X [Source:MGI Symbol;Acc:M          | 6.17E-01  | -1.53 |
| ribosomal protein S6 kinase, polypeptide 2 [Source:MGI Symbol;Acc:MGI:1342290]             | -1.35E+00 | 2.55  |
| insulin-like growth factor 2 receptor [Source:MGI Symbol;Acc:MGI:96435]                    | -1.52E+00 | 2.86  |
| SPARC related modular calcium binding 2 [Source:MGI Symbol;Acc:MGI:1929881]                | 2.02E+00  | -4.05 |
| transcription factor EB [Source:MGI Symbol;Acc:MGI:103270]                                 | -3.96E+00 | 15.51 |
| FYVE, RhoGEF and PH domain containing 2 [Source:MGI Symbol;Acc:MGI:1347084]                | 6.40E-01  | -1.56 |
| NDC80 kinetochore complex component [Source:MGI Symbol;Acc:MGI:1914302]                    | -8.99E-01 | 1.86  |
| E4F transcription factor 1 [Source:MGI Symbol;Acc:MGI:109530]                              | 8.80E-01  | -1.84 |
| PHD finger protein 1 [Source:MGI Symbol;Acc:MGI:98647]                                     | 1.11E+00  | -2.16 |
| regulatory factor X, 2 (influences HLA class II expression) [Source:MGI Symbol;Acc:        | 6.66E-01  | -1.59 |
| BMP and activin membrane-bound inhibitor [Source:MGI Symbol;Acc:MGI:191526]                | 1.42E+00  | -2.67 |
| transporter 2, ATP-binding cassette, sub-family B (MDR/TAP) [Source:MGI Symbol;            | 1.04E+00  | -2.05 |

|                                                                                                                                                      |           |       |
|------------------------------------------------------------------------------------------------------------------------------------------------------|-----------|-------|
| calcium-binding tyrosine-(Y)-phosphorylation regulated (fibrousheathin 2) [Source: MGI Symbol;Acc:MGI:1916476]                                       | 1.08E+00  | -2.11 |
| ArfGAP with RhoGAP domain, ankyrin repeat and PH domain 3 [Source:MGI Symbol;Acc:MGI:1916476]                                                        | 6.22E-01  | -1.54 |
| sorting nexin 24 [Source:MGI Symbol;Acc:MGI:1916476]                                                                                                 | -6.32E-01 | 1.55  |
| CXXC finger 1 (PHD domain) [Source:MGI Symbol;Acc:MGI:1921572]                                                                                       | 6.43E-01  | -1.56 |
| ribosome binding factor A [Source:MGI Symbol;Acc:MGI:1915981]                                                                                        | 1.82E+00  | -3.53 |
| neural precursor cell expressed, developmentally down-regulated gene 4-like [Source:MGI Symbol;Acc:MGI:1915981]                                      | -9.21E-01 | 1.89  |
| CD74 antigen (invariant polypeptide of major histocompatibility complex, class II alpha chain) [Source:MGI Symbol;Acc:MGI:892003]                    | 1.40E+00  | -2.63 |
| treacle ribosome biogenesis factor 1 [Source:MGI Symbol;Acc:MGI:892003]                                                                              | 6.09E-01  | -1.53 |
| phosphoserine aminotransferase 1 [Source:MGI Symbol;Acc:MGI:2183441]                                                                                 | -7.94E-01 | 1.73  |
| annexin A1 [Source:MGI Symbol;Acc:MGI:96819]                                                                                                         | -7.40E-01 | 1.67  |
| lysosomal acid lipase A [Source:MGI Symbol;Acc:MGI:96789]                                                                                            | -6.07E-01 | 1.52  |
| cell division cycle associated 5 [Source:MGI Symbol;Acc:MGI:1915099]                                                                                 | -1.17E+00 | 2.25  |
| kinesin family member 20B [Source:MGI Symbol;Acc:MGI:2444576]                                                                                        | -7.00E-01 | 1.62  |
| interleukin 33 [Source:MGI Symbol;Acc:MGI:1924375]                                                                                                   | 2.04E+00  | -4.12 |
| transmembrane protein 134 [Source:MGI Symbol;Acc:MGI:1914240]                                                                                        | 1.04E+00  | -2.06 |
| RAB1B, member RAS oncogene family [Source:MGI Symbol;Acc:MGI:1923558]                                                                                | 7.48E-01  | -1.68 |
| 3'-phosphoadenosine 5'-phosphosulfate synthase 2 [Source:MGI Symbol;Acc:MGI:1914240]                                                                 | -1.10E+00 | 2.14  |
| ribonuclease H2, subunit C [Source:MGI Symbol;Acc:MGI:1915459]                                                                                       | 7.70E-01  | -1.71 |
| ribosomal protein S6 kinase, polypeptide 4 [Source:MGI Symbol;Acc:MGI:1930076]                                                                       | 7.87E-01  | -1.73 |
| G protein-coupled receptor 137 [Source:MGI Symbol;Acc:MGI:2147529]                                                                                   | 7.09E-01  | -1.64 |
| tectonic family member 3 [Source:MGI Symbol;Acc:MGI:1914840]                                                                                         | -7.60E-01 | 1.69  |
| ubiquitin domain containing 1 [Source:MGI Symbol;Acc:MGI:2385092]                                                                                    | 7.83E-01  | -1.72 |
| nuclear factor of kappa light polypeptide gene enhancer in B cells 2, p49/p100 [Source:MGI Symbol;Acc:MGI:1314633]                                   | 9.06E-01  | -1.87 |
| deoxyribonuclease 1-like 3 [Source:MGI Symbol;Acc:MGI:1314633]                                                                                       | 1.12E+00  | -2.17 |
| Ngfi-A binding protein 2 [Source:MGI Symbol;Acc:MGI:107563]                                                                                          | 7.54E-01  | -1.69 |
| a disintegrin and metallopeptidase domain 8 [Source:MGI Symbol;Acc:MGI:107825]                                                                       | -1.05E+00 | 2.07  |
| thymidine kinase 1 [Source:MGI Symbol;Acc:MGI:98763]                                                                                                 | -8.02E-01 | 1.74  |
| HGF-regulated tyrosine kinase substrate [Source:MGI Symbol;Acc:MGI:104681]                                                                           | 7.33E-01  | -1.66 |
| family with sequence similarity 20, member C [Source:MGI Symbol;Acc:MGI:21368]                                                                       | -1.24E+00 | 2.36  |
| tetraspanin 17 [Source:MGI Symbol;Acc:MGI:1921507]                                                                                                   | 7.45E-01  | -1.68 |
| EYA transcriptional coactivator and phosphatase 1 [Source:MGI Symbol;Acc:MGI:1922962]                                                                | -1.99E+00 | 3.97  |
| transmembrane protein 14A [Source:MGI Symbol;Acc:MGI:1922962]                                                                                        | -1.05E+00 | 2.06  |
| CD28 antigen [Source:MGI Symbol;Acc:MGI:88327]                                                                                                       | -2.81E+00 | 7.00  |
| cyclin-dependent kinase 15 [Source:MGI Symbol;Acc:MGI:3583944]                                                                                       | -1.70E+00 | 3.26  |
| collagen, type III, alpha 1 [Source:MGI Symbol;Acc:MGI:88453]                                                                                        | 2.14E+00  | -4.40 |
| solute carrier family 9 (sodium/hydrogen exchanger), member 4 [Source:MGI Symbol;Acc:MGI:1922962]                                                    | -1.36E+00 | 2.57  |
| sema domain, immunoglobulin domain (Ig), transmembrane domain (TM) and short cytoplasmic tail (SCT) containing 1 [Source:MGI Symbol;Acc:MGI:1922962] | 1.08E+00  | -2.11 |
| cytochrome P450, family 27, subfamily a, polypeptide 1 [Source:MGI Symbol;Acc:MGI:1922962]                                                           | 5.99E-01  | -1.51 |
| integral membrane protein 2C [Source:MGI Symbol;Acc:MGI:1927594]                                                                                     | 8.59E-01  | -1.81 |
| phosphodiesterase 6D, cGMP-specific, rod, delta [Source:MGI Symbol;Acc:MGI:127594]                                                                   | 7.12E-01  | -1.64 |
| regulator of G-protein signaling 1 [Source:MGI Symbol;Acc:MGI:1354694]                                                                               | -6.63E-01 | 1.58  |
| complement component factor h [Source:MGI Symbol;Acc:MGI:88385]                                                                                      | 8.99E-01  | -1.87 |
| cyclin-dependent kinase 18 [Source:MGI Symbol;Acc:MGI:97518]                                                                                         | -9.67E-01 | 1.95  |
| pyrroline-5-carboxylate reductase family, member 2 [Source:MGI Symbol;Acc:MGI:1922962]                                                               | 8.24E-01  | -1.77 |
| Ral GEF with PH domain and SH3 binding motif 2 [Source:MGI Symbol;Acc:MGI:1922962]                                                                   | 7.51E-01  | -1.68 |
| sterol O-acyltransferase 1 [Source:MGI Symbol;Acc:MGI:104665]                                                                                        | -7.32E-01 | 1.66  |
| centromere protein F [Source:MGI Symbol;Acc:MGI:1313302]                                                                                             | -7.23E-01 | 1.65  |

|                                                                                           |           |        |
|-------------------------------------------------------------------------------------------|-----------|--------|
| basic leucine zipper transcription factor, ATF-like 3 [Source:MGI Symbol;Acc:MGI:1        | 1.18E+00  | -2.27  |
| plexin A2 [Source:MGI Symbol;Acc:MGI:107684]                                              | -1.30E+00 | 2.46   |
| minichromosome maintenance 10 replication initiation factor [Source:MGI Symbo             | -1.14E+00 | 2.21   |
| NUF2, NDC80 kinetochore complex component [Source:MGI Symbol;Acc:MGI:191                  | -1.03E+00 | 2.04   |
| plexin domain containing 2 [Source:MGI Symbol;Acc:MGI:1914698]                            | 8.52E-01  | -1.81  |
| microtubule associated serine/threonine kinase-like [Source:MGI Symbol;Acc:MGI            | -1.05E+00 | 2.08   |
| growth factor independent 1B [Source:MGI Symbol;Acc:MGI:1276578]                          | -7.29E+00 | 156.34 |
| general transcription factor IIIC, polypeptide 5 [Source:MGI Symbol;Acc:MGI:1917          | 9.50E-01  | -1.93  |
| globoside alpha-1,3-N-acetylgalactosaminyltransferase 1 [Source:MGI Symbol;Acc:           | 1.18E+00  | -2.27  |
| olfactomedin 1 [Source:MGI Symbol;Acc:MGI:1860437]                                        | 7.72E-01  | -1.71  |
| G-protein signalling modulator 1 (AGS3-like, C. elegans) [Source:MGI Symbol;Acc:M         | 8.77E-01  | -1.84  |
| dehydrogenase/reductase (SDR family) member 9 [Source:MGI Symbol;Acc:MGI:2                | -2.52E+00 | 5.72   |
| deoxyuridine triphosphatase [Source:MGI Symbol;Acc:MGI:1346051]                           | -9.05E-01 | 1.87   |
| nucleolar and spindle associated protein 1 [Source:MGI Symbol;Acc:MGI:2675669]            | -1.18E+00 | 2.27   |
| RAD51 recombinase [Source:MGI Symbol;Acc:MGI:97890]                                       | -1.13E+00 | 2.19   |
| kinetochore scaffold 1 [Source:MGI Symbol;Acc:MGI:1923714]                                | -1.05E+00 | 2.07   |
| BUB1, mitotic checkpoint serine/threonine kinase [Source:MGI Symbol;Acc:MGI:1             | -1.03E+00 | 2.04   |
| small nuclear ribonucleoprotein B [Source:MGI Symbol;Acc:MGI:98342]                       | 6.97E-01  | -1.62  |
| CD93 antigen [Source:MGI Symbol;Acc:MGI:106664]                                           | -8.62E-01 | 1.82   |
| GIN5 complex subunit 1 (Psf1 homolog) [Source:MGI Symbol;Acc:MGI:1916520]                 | -6.84E-01 | 1.61   |
| RanBP-type and C3HC4-type zinc finger containing 1 [Source:MGI Symbol;Acc:MGI             | 8.68E-01  | -1.83  |
| TPX2, microtubule-associated [Source:MGI Symbol;Acc:MGI:1919369]                          | -1.02E+00 | 2.03   |
| aurora kinase A [Source:MGI Symbol;Acc:MGI:894678]                                        | -9.13E-01 | 1.88   |
| RNA binding motif protein 38 [Source:MGI Symbol;Acc:MGI:1889294]                          | 1.77E+00  | -3.42  |
| fatty acid binding protein 5, epidermal [Source:MGI Symbol;Acc:MGI:101790]                | -1.72E+00 | 3.29   |
| DSN1 homolog, MIS12 kinetochore complex component [Source:MGI Symbol;Acc:                 | -7.22E-01 | 1.65   |
| neutral cholesterol ester hydrolase 1 [Source:MGI Symbol;Acc:MGI:2443191]                 | -6.98E-01 | 1.62   |
| ect2 oncogene [Source:MGI Symbol;Acc:MGI:95281]                                           | -8.02E-01 | 1.74   |
| stress-associated endoplasmic reticulum protein 1 [Source:MGI Symbol;Acc:MGI:9            | 5.92E-01  | -1.51  |
| G-protein signalling modulator 2 (AGS3-like, C. elegans) [Source:MGI Symbol;Acc:M         | -6.94E-01 | 1.62   |
| S-adenosylhomocysteine hydrolase-like 1 [Source:MGI Symbol;Acc:MGI:2385184]               | -5.94E-01 | 1.51   |
| CREB regulated transcription coactivator 2 [Source:MGI Symbol;Acc:MGI:1921593]            | 8.16E-01  | -1.76  |
| family with sequence similarity 198, member B [Source:MGI Symbol;Acc:MGI:1915             | -1.58E+00 | 2.99   |
| a disintegrin and metallopeptidase domain 15 (metargidin) [Source:MGI Symbol;A            | 9.84E-01  | -1.98  |
| zinc finger and BTB domain containing 7B [Source:MGI Symbol;Acc:MGI:102755]               | 7.07E-01  | -1.63  |
| sema domain, immunoglobulin domain (Ig), transmembrane domain (TM) and sho                | 1.24E+00  | -2.36  |
| IQ motif containing GTPase activating protein 3 [Source:MGI Symbol;Acc:MGI:302            | -9.68E-01 | 1.96   |
| breast cancer anti-estrogen resistance 3 [Source:MGI Symbol;Acc:MGI:1352501]              | -8.50E-01 | 1.80   |
| GTP binding protein (gene overexpressed in skeletal muscle) [Source:MGI Symbol,           | -9.01E-01 | 1.87   |
| ATPase, H <sup>+</sup> transporting, lysosomal V0 subunit D2 [Source:MGI Symbol;Acc:MGI:1 | -2.18E+00 | 4.55   |
| thiosulfate sulfurtransferase (rhodanese)-like domain containing 3 [Source:MGI Sy         | -8.44E-01 | 1.80   |
| structural maintenance of chromosomes 2 [Source:MGI Symbol;Acc:MGI:106067]                | -6.75E-01 | 1.60   |
| STRA6-like [Source:MGI Symbol;Acc:MGI:1921402]                                            | -2.55E+00 | 5.87   |
| coiled-coil domain containing 107 [Source:MGI Symbol;Acc:MGI:1913423]                     | 6.33E-01  | -1.55  |
| perilipin 2 [Source:MGI Symbol;Acc:MGI:87920]                                             | -7.81E-01 | 1.72   |
| angiopoietin-like 3 [Source:MGI Symbol;Acc:MGI:1353627]                                   | -1.35E+00 | 2.56   |
| MYC binding protein [Source:MGI Symbol;Acc:MGI:1891750]                                   | -7.00E-01 | 1.62   |

|                                                                                       |           |       |
|---------------------------------------------------------------------------------------|-----------|-------|
| lysophospholipase 2 [Source:MGI Symbol;Acc:MGI:1347000]                               | 8.28E-01  | -1.78 |
| RAD54 like ( <i>S. cerevisiae</i> ) [Source:MGI Symbol;Acc:MGI:894697]                | -9.28E-01 | 1.90  |
| Scf/Tal1 interrupting locus [Source:MGI Symbol;Acc:MGI:107477]                        | -1.40E+00 | 2.64  |
| hepatocyte growth factor [Source:MGI Symbol;Acc:MGI:96079]                            | -9.09E-01 | 1.88  |
| cell division cycle associated 8 [Source:MGI Symbol;Acc:MGI:1196274]                  | -8.04E-01 | 1.75  |
| sphingomyelin phosphodiesterase, acid-like 3B [Source:MGI Symbol;Acc:MGI:1916         | 8.13E-01  | -1.76 |
| tRNA selenocysteine 1 associated protein 1 [Source:MGI Symbol;Acc:MGI:1919037         | 7.02E-01  | -1.63 |
| ERBB receptor feedback inhibitor 1 [Source:MGI Symbol;Acc:MGI:1921405]                | 5.97E-01  | -1.51 |
| peroxisomal biogenesis factor 14 [Source:MGI Symbol;Acc:MGI:1927868]                  | 7.38E-01  | -1.67 |
| ATPase family, AAA domain containing 3A [Source:MGI Symbol;Acc:MGI:1919214]           | 7.26E-01  | -1.65 |
| ATP binding cassette subfamily G member 3 [Source:MGI Symbol;Acc:MGI:135162           | -6.80E-01 | 1.60  |
| secreted phosphoprotein 1 [Source:MGI Symbol;Acc:MGI:98389]                           | -1.54E+00 | 2.91  |
| protein-tyrosine sulfotransferase 2 [Source:MGI Symbol;Acc:MGI:1309516]               | 7.00E-01  | -1.62 |
| WD repeat and SOCS box-containing 2 [Source:MGI Symbol;Acc:MGI:2144041]               | -6.94E-01 | 1.62  |
| phosphoglycerate mutase family member 5 [Source:MGI Symbol;Acc:MGI:191979:            | 8.80E-01  | -1.84 |
| citron [Source:MGI Symbol;Acc:MGI:105313]                                             | -7.54E-01 | 1.69  |
| transcription factor EC [Source:MGI Symbol;Acc:MGI:1333760]                           | -6.60E-01 | 1.58  |
| fascin actin-bundling protein 1 [Source:MGI Symbol;Acc:MGI:1352745]                   | 1.91E+00  | -3.76 |
| autism susceptibility candidate 2 [Source:MGI Symbol;Acc:MGI:1919847]                 | 1.87E+00  | -3.66 |
| TSC22 domain family, member 4 [Source:MGI Symbol;Acc:MGI:1926079]                     | 7.75E-01  | -1.71 |
| minichromosome maintenance complex component 7 [Source:MGI Symbol;Acc:M               | -6.63E-01 | 1.58  |
| transmembrane protein 176B [Source:MGI Symbol;Acc:MGI:1916348]                        | 8.45E-01  | -1.80 |
| glycoprotein (transmembrane) nmb [Source:MGI Symbol;Acc:MGI:1934765]                  | -2.45E+00 | 5.47  |
| neuropeptide Y [Source:MGI Symbol;Acc:MGI:97374]                                      | -3.08E+00 | 8.45  |
| MAD2 mitotic arrest deficient-like 1 [Source:MGI Symbol;Acc:MGI:1860374]              | -9.07E-01 | 1.88  |
| plexin A1 [Source:MGI Symbol;Acc:MGI:107685]                                          | -8.36E-01 | 1.79  |
| basic helix-loop-helix family, member e40 [Source:MGI Symbol;Acc:MGI:1097714]         | -9.65E-01 | 1.95  |
| C-type lectin domain family 4, member d [Source:MGI Symbol;Acc:MGI:1298389]           | -6.37E-01 | 1.56  |
| C-type lectin domain family 4, member b1 [Source:MGI Symbol;Acc:MGI:1917060]          | 6.59E-01  | -1.58 |
| epithelial membrane protein 1 [Source:MGI Symbol;Acc:MGI:107941]                      | -7.08E-01 | 1.63  |
| phospholipase B domain containing 1 [Source:MGI Symbol;Acc:MGI:1914107]               | 1.39E+00  | -2.62 |
| RAD18 E3 ubiquitin protein ligase [Source:MGI Symbol;Acc:MGI:1890476]                 | -6.56E-01 | 1.58  |
| basic helix-loop-helix family, member e41 [Source:MGI Symbol;Acc:MGI:1930704]         | -8.31E-01 | 1.78  |
| calcium/calmodulin-dependent protein kinase I [Source:MGI Symbol;Acc:MGI:109:         | 7.39E-01  | -1.67 |
| RAD51 associated protein 1 [Source:MGI Symbol;Acc:MGI:1098224]                        | -1.33E+00 | 2.51  |
| sialic acid binding Ig-like lectin E [Source:MGI Symbol;Acc:MGI:1932475]              | 6.09E-01  | -1.52 |
| nuclear factor of kappa light polypeptide gene enhancer in B cells inhibitor, beta [S | 7.65E-01  | -1.70 |
| kinesin family member 22 [Source:MGI Symbol;Acc:MGI:109233]                           | -8.89E-01 | 1.85  |
| sulfotransferase family 1A, phenol-preferring, member 1 [Source:MGI Symbol;Acc:       | 9.42E-01  | -1.92 |
| diacylglycerol O-acyltransferase 2 [Source:MGI Symbol;Acc:MGI:1915050]                | 1.03E+00  | -2.04 |
| lymphatic vessel endothelial hyaluronan receptor 1 [Source:MGI Symbol;Acc:MGI:        | 8.93E-01  | -1.86 |
| adrenomedullin [Source:MGI Symbol;Acc:MGI:108058]                                     | 1.32E+00  | -2.50 |
| BCL2-associated athanogene 3 [Source:MGI Symbol;Acc:MGI:1352493]                      | 6.83E-01  | -1.61 |
| polo like kinase 1 [Source:MGI Symbol;Acc:MGI:97621]                                  | -8.08E-01 | 1.75  |
| crystallin, mu [Source:MGI Symbol;Acc:MGI:102675]                                     | 1.29E+00  | -2.45 |
| antigen identified by monoclonal antibody Ki 67 [Source:MGI Symbol;Acc:MGI:106        | -1.05E+00 | 2.07  |
| troponin I, skeletal, fast 2 [Source:MGI Symbol;Acc:MGI:105070]                       | -8.12E-01 | 1.76  |

|                                                                                                                                                |           |       |
|------------------------------------------------------------------------------------------------------------------------------------------------|-----------|-------|
| proteolipid protein 2 [Source:MGI Symbol;Acc:MGI:1298382]                                                                                      | -5.89E-01 | 1.50  |
| ephrin B1 [Source:MGI Symbol;Acc:MGI:102708]                                                                                                   | 1.24E+00  | -2.37 |
| centromere protein I [Source:MGI Symbol;Acc:MGI:2147897]                                                                                       | -8.80E-01 | 1.84  |
| adaptor-related protein complex 1, sigma 2 subunit [Source:MGI Symbol;Acc:MGI:1914139]                                                         | 6.40E-01  | -1.56 |
| ring finger protein 128 [Source:MGI Symbol;Acc:MGI:1914139]                                                                                    | -1.02E+00 | 2.03  |
| tumor necrosis factor (ligand) superfamily, member 13b [Source:MGI Symbol;Acc:MGI:1914139]                                                     | 6.49E-01  | -1.57 |
| hydroxyprostaglandin dehydrogenase 15 (NAD) [Source:MGI Symbol;Acc:MGI:1081914139]                                                             | 9.03E-01  | -1.87 |
| TBC1 domain family, member 9 [Source:MGI Symbol;Acc:MGI:1918560]                                                                               | -9.26E-01 | 1.90  |
| homocysteine-inducible, endoplasmic reticulum stress-inducible, ubiquitin-like domain containing protein 1 [Source:MGI Symbol;Acc:MGI:1918560] | 6.83E-01  | -1.60 |
| kinesin family member C3 [Source:MGI Symbol;Acc:MGI:109202]                                                                                    | 1.16E+00  | -2.23 |
| GINS complex subunit 2 (Psf2 homolog) [Source:MGI Symbol;Acc:MGI:1921019]                                                                      | -6.21E-01 | 1.54  |
| kelch-like 36 [Source:MGI Symbol;Acc:MGI:2385305]                                                                                              | 1.57E+00  | -2.97 |
| RAB3A, member RAS oncogene family [Source:MGI Symbol;Acc:MGI:97843]                                                                            | 8.87E-01  | -1.85 |
| Ras-related associated with diabetes [Source:MGI Symbol;Acc:MGI:1930943]                                                                       | 1.26E+00  | -2.39 |
| solute carrier family 37 (glycerol-3-phosphate transporter), member 2 [Source:MGI Symbol;Acc:MGI:88311]                                        | -7.63E-01 | 1.70  |
| cyclin B2 [Source:MGI Symbol;Acc:MGI:88311]                                                                                                    | -7.51E-01 | 1.68  |
| meiosis-specific nuclear structural protein 1 [Source:MGI Symbol;Acc:MGI:107933]                                                               | -1.20E+00 | 2.30  |
| annexin A2 [Source:MGI Symbol;Acc:MGI:88246]                                                                                                   | -6.94E-01 | 1.62  |
| stomatin-like 1 [Source:MGI Symbol;Acc:MGI:1916356]                                                                                            | 7.90E-01  | -1.73 |
| SPG21, maspardin [Source:MGI Symbol;Acc:MGI:106403]                                                                                            | 1.59E+00  | -3.02 |
| mitochondrial ribosomal protein L3 [Source:MGI Symbol;Acc:MGI:2137204]                                                                         | 9.41E-01  | -1.92 |
| nudix (nucleoside diphosphate linked moiety X)-type motif 16 [Source:MGI Symbol;Acc:MGI:1277955]                                               | 8.50E-01  | -1.80 |
| bassoon [Source:MGI Symbol;Acc:MGI:1277955]                                                                                                    | -2.97E+00 | 7.82  |
| ataxin 2-like [Source:MGI Symbol;Acc:MGI:2446242]                                                                                              | 6.61E-01  | -1.58 |
| CD59a antigen [Source:MGI Symbol;Acc:MGI:109177]                                                                                               | -6.80E-01 | 1.60  |
| pyridoxal (pyridoxine, vitamin B6) kinase [Source:MGI Symbol;Acc:MGI:1351869]                                                                  | -6.94E-01 | 1.62  |
| ATP-binding cassette, sub-family C (CFTR/MRP), member 10 [Source:MGI Symbol;Acc:MGI:95541]                                                     | 1.16E+00  | -2.23 |
| FK506 binding protein 1a [Source:MGI Symbol;Acc:MGI:95541]                                                                                     | 6.32E-01  | -1.55 |
| cysteine dioxygenase 1, cytosolic [Source:MGI Symbol;Acc:MGI:105925]                                                                           | -1.33E+00 | 2.51  |
| golgi associated, gamma adaptin ear containing, ARF binding protein 1 [Source:MGI Symbol;Acc:MGI:105925]                                       | 1.20E+00  | -2.30 |
| DIS3 homolog, exosome endoribonuclease and 3'-5' exoribonuclease [Source:MGI Symbol;Acc:MGI:19236]                                             | -7.69E-01 | 1.70  |
| LIM domain containing preferred translocation partner in lipoma [Source:MGI Symbol;Acc:MGI:109547]                                             | -5.92E-01 | 1.51  |
| dynamitin 2 [Source:MGI Symbol;Acc:MGI:109547]                                                                                                 | 8.07E-01  | -1.75 |
| lymphoblastoid leukemia 1 [Source:MGI Symbol;Acc:MGI:96891]                                                                                    | 8.86E-01  | -1.85 |
| CLOCK interacting protein, circadian [Source:MGI Symbol;Acc:MGI:1919185]                                                                       | -1.13E+00 | 2.19  |
| cyclin D3 [Source:MGI Symbol;Acc:MGI:88315]                                                                                                    | 7.55E-01  | -1.69 |
| BRCA1 interacting protein C-terminal helicase 1 [Source:MGI Symbol;Acc:MGI:2446242]                                                            | -1.03E+00 | 2.04  |
| EGF-like repeats and discoidin I-like domains 3 [Source:MGI Symbol;Acc:MGI:13290]                                                              | 1.46E+00  | -2.75 |
| protein phosphatase 1, regulatory subunit 18 [Source:MGI Symbol;Acc:MGI:19236]                                                                 | 7.75E-01  | -1.71 |
| carbohydrate sulfotransferase 11 [Source:MGI Symbol;Acc:MGI:1927166]                                                                           | -1.31E+00 | 2.48  |
| drebrin 1 [Source:MGI Symbol;Acc:MGI:1931838]                                                                                                  | 1.61E+00  | -3.05 |
| glucosamine (N-acetyl)-6-sulfatase [Source:MGI Symbol;Acc:MGI:1922862]                                                                         | -6.73E-01 | 1.59  |
| cDNA sequence BC030867 [Source:MGI Symbol;Acc:MGI:2387601]                                                                                     | -1.12E+00 | 2.17  |
| guanine nucleotide binding protein, alpha 15 [Source:MGI Symbol;Acc:MGI:95770]                                                                 | 1.05E+00  | -2.07 |
| non-SMC condensin I complex, subunit H [Source:MGI Symbol;Acc:MGI:2444777]                                                                     | -7.52E-01 | 1.68  |
| ADP-ribosylation factor-like 4D [Source:MGI Symbol;Acc:MGI:1933155]                                                                            | 1.10E+00  | -2.15 |
| heparanase [Source:MGI Symbol;Acc:MGI:1343124]                                                                                                 | -1.23E+00 | 2.35  |

|                                                                                        |           |       |
|----------------------------------------------------------------------------------------|-----------|-------|
| N-acetylglucosamine-1-phosphate transferase, alpha and beta subunits [Source:M         | -8.13E-01 | 1.76  |
| chemokine (C-C motif) ligand 12 [Source:MGI Symbol;Acc:MGI:108224]                     | 8.90E-01  | -1.85 |
| PARP1 binding protein [Source:MGI Symbol;Acc:MGI:1922567]                              | -1.26E+00 | 2.39  |
| 4HAUS augmin-like complex, subunit 8 [Source:MGI Symbol;Acc:MGI:1923728]               | -6.15E-01 | 1.53  |
| fidgetin-like 1 [Source:MGI Symbol;Acc:MGI:1890648]                                    | -8.19E-01 | 1.76  |
| leukocyte receptor cluster (LRC) member 8 [Source:MGI Symbol;Acc:MGI:2142195]          | 1.00E+00  | -2.01 |
| MPV17 mitochondrial membrane protein-like 2 [Source:MGI Symbol;Acc:MGI:268             | 1.46E+00  | -2.76 |
| tRNA splicing endonuclease subunit 34 [Source:MGI Symbol;Acc:MGI:1913328]              | 1.20E+00  | -2.30 |
| strawberry notch homolog 2 (Drosophila) [Source:MGI Symbol;Acc:MGI:2448490]            | 8.76E-01  | -1.83 |
| maternal embryonic leucine zipper kinase [Source:MGI Symbol;Acc:MGI:106924]            | -1.05E+00 | 2.07  |
| docking protein 3 [Source:MGI Symbol;Acc:MGI:1351490]                                  | 1.14E+00  | -2.21 |
| mitochondrial ribosomal protein S2 [Source:MGI Symbol;Acc:MGI:2153089]                 | 9.16E-01  | -1.89 |
| GRAM domain containing 4 [Source:MGI Symbol;Acc:MGI:2676308]                           | -9.68E-01 | 1.96  |
| zinc finger, RAN-binding domain containing 3 [Source:MGI Symbol;Acc:MGI:19183          | -1.43E+00 | 2.70  |
| mannoside acetylglucosaminyltransferase 5 [Source:MGI Symbol;Acc:MGI:894701            | -7.53E-01 | 1.69  |
| leucine-rich repeat kinase 2 [Source:MGI Symbol;Acc:MGI:1913975]                       | -9.73E-01 | 1.96  |
| purinergic receptor P2Y, G-protein coupled, 14 [Source:MGI Symbol;Acc:MGI:2155         | -6.07E-01 | 1.52  |
| tubulin-specific chaperone C [Source:MGI Symbol;Acc:MGI:1919976]                       | 1.54E+00  | -2.92 |
| caspase recruitment domain family, member 11 [Source:MGI Symbol;Acc:MGI:191            | -2.17E+00 | 4.50  |
| histocompatibility 2, class II antigen A, alpha [Source:MGI Symbol;Acc:MGI:95895]      | 1.35E+00  | -2.55 |
| kinesin family member 15 [Source:MGI Symbol;Acc:MGI:1098258]                           | -1.40E+00 | 2.65  |
| kelch-like 13 [Source:MGI Symbol;Acc:MGI:1914705]                                      | 8.92E-01  | -1.86 |
| mucolin 3 [Source:MGI Symbol;Acc:MGI:1890500]                                          | -2.06E+00 | 4.17  |
| RIKEN cDNA 2410004B18 gene [Source:MGI Symbol;Acc:MGI:1913671]                         | 6.12E-01  | -1.53 |
| DNA replication helicase/nuclease 2 [Source:MGI Symbol;Acc:MGI:2443732]                | -8.21E-01 | 1.77  |
| complement component 1, q subcomponent, alpha polypeptide [Source:MGI Syml             | 9.00E-01  | -1.87 |
| complement component 1, q subcomponent, C chain [Source:MGI Symbol;Acc:MG              | 8.78E-01  | -1.84 |
| unc-93 homolog B1 (C. elegans) [Source:MGI Symbol;Acc:MGI:1859307]                     | 5.98E-01  | -1.51 |
| nuclear factor of kappa light polypeptide gene enhancer in B cells inhibitor, delta [! | 9.36E-01  | -1.91 |
| amyloid beta (A4) precursor protein-binding, family B, member 1 [Source:MGI Syrr       | 1.44E+00  | -2.71 |
| Rho GTPase activating protein 10 [Source:MGI Symbol;Acc:MGI:1925764]                   | -7.95E-01 | 1.73  |
| polypeptide N-acetylgalactosaminyltransferase 6 [Source:MGI Symbol;Acc:MGI:18          | -8.27E-01 | 1.77  |
| transforming, acidic coiled-coil containing protein 3 [Source:MGI Symbol;Acc:MGI:      | -6.23E-01 | 1.54  |
| intercellular adhesion molecule 1 [Source:MGI Symbol;Acc:MGI:96392]                    | 6.29E-01  | -1.55 |
| calcium and integrin binding family member 2 [Source:MGI Symbol;Acc:MGI:1929           | 1.08E+00  | -2.11 |
| discs, large (Drosophila) homolog-associated protein 5 [Source:MGI Symbol;Acc:M        | -7.85E-01 | 1.72  |
| transducer of ErbB-2.1 [Source:MGI Symbol;Acc:MGI:1349721]                             | 6.34E-01  | -1.55 |
| cyclin-dependent kinase inhibitor 3 [Source:MGI Symbol;Acc:MGI:1919641]                | -7.73E-01 | 1.71  |
| histocompatibility 2, class II, locus DMA [Source:MGI Symbol;Acc:MGI:95921]            | 8.37E-01  | -1.79 |
| DDHD domain containing 1 [Source:MGI Symbol;Acc:MGI:2150302]                           | -8.44E-01 | 1.80  |
| CD81 antigen [Source:MGI Symbol;Acc:MGI:1096398]                                       | 9.68E-01  | -1.96 |
| transglutaminase 2, C polypeptide [Source:MGI Symbol;Acc:MGI:98731]                    | -6.93E-01 | 1.62  |
| REST corepressor 1 [Source:MGI Symbol;Acc:MGI:106340]                                  | -7.27E-01 | 1.66  |
| retinoic acid receptor, alpha [Source:MGI Symbol;Acc:MGI:97856]                        | 8.67E-01  | -1.82 |
| DENN/MADD domain containing 4C [Source:MGI Symbol;Acc:MGI:1914769]                     | -8.07E-01 | 1.75  |
| ring finger protein 144B [Source:MGI Symbol;Acc:MGI:2384986]                           | -1.05E+00 | 2.07  |
| CDKN2A interacting protein [Source:MGI Symbol;Acc:MGI:1918175]                         | 8.45E-01  | -1.80 |

|                                                                                                        |           |       |
|--------------------------------------------------------------------------------------------------------|-----------|-------|
| prolyl 3-hydroxylase 2 [Source:MGI Symbol;Acc:MGI:2146663]                                             | 2.15E+00  | -4.45 |
| SLAM family member 7 [Source:MGI Symbol;Acc:MGI:1922595]                                               | -6.14E-01 | 1.53  |
| sestrin 1 [Source:MGI Symbol;Acc:MGI:2155278]                                                          | 7.61E-01  | -1.70 |
| Ttk protein kinase [Source:MGI Symbol;Acc:MGI:1194921]                                                 | -1.14E+00 | 2.20  |
| CDC16 cell division cycle 16 [Source:MGI Symbol;Acc:MGI:1917207]                                       | 7.25E-01  | -1.65 |
| ubiquinol-cytochrome c reductase, Rieske iron-sulfur polypeptide 1 [Source:MGI S                       | 1.42E+00  | -2.68 |
| Josephin domain containing 2 [Source:MGI Symbol;Acc:MGI:1913374]                                       | 7.48E-01  | -1.68 |
| left right determination factor 1 [Source:MGI Symbol;Acc:MGI:107405]                                   | 1.53E+00  | -2.88 |
| protein regulator of cytokinesis 1 [Source:MGI Symbol;Acc:MGI:1858961]                                 | -1.01E+00 | 2.02  |
| alanyl (membrane) aminopeptidase [Source:MGI Symbol;Acc:MGI:5000466]                                   | -1.40E+00 | 2.63  |
| runt related transcription factor 2 [Source:MGI Symbol;Acc:MGI:99829]                                  | -1.07E+00 | 2.11  |
| AT-hook transcription factor [Source:MGI Symbol;Acc:MGI:2140340]                                       | 6.33E-01  | -1.55 |
| ring finger protein 122 [Source:MGI Symbol;Acc:MGI:1916117]                                            | 1.09E+00  | -2.13 |
| THAP domain containing, apoptosis associated protein 3 [Source:MGI Symbol;Acc:                         | 7.20E-01  | -1.65 |
| zinc finger CCCH type containing 10 [Source:MGI Symbol;Acc:MGI:2143670]                                | 7.13E-01  | -1.64 |
| zinc finger protein 335 [Source:MGI Symbol;Acc:MGI:2682313]                                            | 1.28E+00  | -2.43 |
| solute carrier family 26, member 11 [Source:MGI Symbol;Acc:MGI:2444589]                                | -7.34E-01 | 1.66  |
| prostaglandin E receptor 4 (subtype EP4) [Source:MGI Symbol;Acc:MGI:104311]                            | 1.16E+00  | -2.24 |
| GRAM domain containing 1B [Source:MGI Symbol;Acc:MGI:1925037]                                          | -1.01E+00 | 2.01  |
| PCNA clamp associated factor [Source:MGI Symbol;Acc:MGI:1915276]                                       | -1.03E+00 | 2.04  |
| G protein-coupled receptor 34 [Source:MGI Symbol;Acc:MGI:1346334]                                      | 6.62E-01  | -1.58 |
| NADH dehydrogenase (ubiquinone) 1 alpha subcomplex, 4-like 2 [Source:MGI Sym                           | 2.37E+00  | -5.18 |
| protein phosphatase 1, regulatory (inhibitor) subunit 15A [Source:MGI Symbol;Acc                       | 6.25E-01  | -1.54 |
| zinc finger, MYND-type containing 15 [Source:MGI Symbol;Acc:MGI:3603821]                               | 7.54E-01  | -1.69 |
| ATPase, Na <sup>+</sup> /K <sup>+</sup> transporting, alpha 3 polypeptide [Source:MGI Symbol;Acc:MGI:8 | -9.96E-01 | 1.99  |
| Rho guanine nucleotide exchange factor (GEF) 1 [Source:MGI Symbol;Acc:MGI:135                          | 7.99E-01  | -1.74 |
| macrophage galactose N-acetyl-galactosamine specific lectin 2 [Source:MGI Symbc                        | 1.06E+00  | -2.08 |
| Rho guanine nucleotide exchange factor (GEF) 10-like [Source:MGI Symbol;Acc:MC                         | 7.73E-01  | -1.71 |
| neuroblastoma, suppression of tumorigenicity 1 [Source:MGI Symbol;Acc:MGI:104                          | 3.19E+00  | -9.12 |
| phospholipase A2, group IID [Source:MGI Symbol;Acc:MGI:1341796]                                        | 1.94E+00  | -3.84 |
| Dmx-like 2 [Source:MGI Symbol;Acc:MGI:2444630]                                                         | -7.94E-01 | 1.73  |
| MyoD family inhibitor domain containing [Source:MGI Symbol;Acc:MGI:104611]                             | -8.05E-01 | 1.75  |
| cyclin B1 [Source:MGI Symbol;Acc:MGI:88302]                                                            | -1.18E+00 | 2.27  |
| kinesin family member 14 [Source:MGI Symbol;Acc:MGI:1098226]                                           | -1.42E+00 | 2.68  |
| interferon regulatory factor 8 [Source:MGI Symbol;Acc:MGI:96395]                                       | 6.19E-01  | -1.54 |
| NOP53 ribosome biogenesis factor [Source:MGI Symbol;Acc:MGI:2154441]                                   | 9.46E-01  | -1.93 |
| ubiquitin associated domain containing 2 [Source:MGI Symbol;Acc:MGI:1916139]                           | 6.06E-01  | -1.52 |
| transmembrane and coiled-coil domains 2 [Source:MGI Symbol;Acc:MGI:1916125]                            | 8.99E-01  | -1.86 |
| arylsulfatase B [Source:MGI Symbol;Acc:MGI:88075]                                                      | 6.56E-01  | -1.58 |
| claspin [Source:MGI Symbol;Acc:MGI:2445153]                                                            | -1.81E+00 | 3.51  |
| ADP-ribosylhydrolase like 2 [Source:MGI Symbol;Acc:MGI:2140364]                                        | 8.80E-01  | -1.84 |
| heme binding protein 1 [Source:MGI Symbol;Acc:MGI:1333880]                                             | -1.82E+00 | 3.53  |
| serine (or cysteine) peptidase inhibitor, clade B, member 6b [Source:MGI Symbol;/                      | -1.66E+00 | 3.16  |
| hypoxia inducible lipid droplet associated [Source:MGI Symbol;Acc:MGI:1916823]                         | -1.20E+00 | 2.30  |
| chemokine (C-C motif) receptor-like 2 [Source:MGI Symbol;Acc:MGI:1920904]                              | -9.92E-01 | 1.99  |
| formin 1 [Source:MGI Symbol;Acc:MGI:101815]                                                            | -6.65E-01 | 1.59  |
| transformation related protein 53 inducible protein 13 [Source:MGI Symbol;Acc:M                        | 9.26E-01  | -1.90 |



|                                                                                              |           |       |
|----------------------------------------------------------------------------------------------|-----------|-------|
| apelin receptor [Source:MGI Symbol;Acc:MGI:1346086]                                          | 2.30E+00  | -4.91 |
| dedicator of cytokinesis 5 [Source:MGI Symbol;Acc:MGI:2652871]                               | -9.62E-01 | 1.95  |
| Ras and Rab interactor 3 [Source:MGI Symbol;Acc:MGI:2385708]                                 | -7.34E-01 | 1.66  |
| kallikrein 1-related peptidase b11 [Source:MGI Symbol;Acc:MGI:892023]                        | -5.67E+00 | 50.81 |
| expressed sequence AI467606 [Source:MGI Symbol;Acc:MGI:2141979]                              | 8.56E-01  | -1.81 |
| zinc finger protein 574 [Source:MGI Symbol;Acc:MGI:2442951]                                  | 9.95E-01  | -1.99 |
| zinc finger protein 691 [Source:MGI Symbol;Acc:MGI:3041163]                                  | 9.52E-01  | -1.94 |
| lipoma HMGIC fusion partner-like 2 [Source:MGI Symbol;Acc:MGI:2145236]                       | -1.10E+00 | 2.14  |
| centromere protein E [Source:MGI Symbol;Acc:MGI:1098230]                                     | -9.09E-01 | 1.88  |
| tumor necrosis factor receptor superfamily, member 26 [Source:MGI Symbol;Acc:MGI:2145236]    | -9.69E-01 | 1.96  |
| transmembrane protein 88 [Source:MGI Symbol;Acc:MGI:1914270]                                 | 8.30E-01  | -1.78 |
| adrenergic receptor, beta 2 [Source:MGI Symbol;Acc:MGI:87938]                                | 5.90E-01  | -1.51 |
| tumor-suppressing subchromosomal transferable fragment 4 [Source:MGI Symbol;Acc:MGI:2145236] | 8.06E-01  | -1.75 |
| zinc finger protein 764 [Source:MGI Symbol;Acc:MGI:2443580]                                  | 8.48E-01  | -1.80 |
| centrosomal protein 295 [Source:MGI Symbol;Acc:MGI:2442521]                                  | -6.08E-01 | 1.52  |
| E2F transcription factor 8 [Source:MGI Symbol;Acc:MGI:1922038]                               | -1.18E+00 | 2.27  |
| CD109 antigen [Source:MGI Symbol;Acc:MGI:2445221]                                            | -1.68E+00 | 3.20  |
| syntaxin binding protein 6 (amisyn) [Source:MGI Symbol;Acc:MGI:2384963]                      | 9.36E-01  | -1.91 |
| developmental pluripotency-associated 3 [Source:MGI Symbol;Acc:MGI:1920958]                  | -9.50E-01 | 1.93  |
| retinol binding protein 1, cellular [Source:MGI Symbol;Acc:MGI:97876]                        | 1.03E+00  | -2.05 |
| family with sequence similarity 43, member A [Source:MGI Symbol;Acc:MGI:26763]               | 1.22E+00  | -2.33 |
| G protein-coupled receptor, family C, group 5, member A [Source:MGI Symbol;Acc:MGI:26763]    | -1.07E+00 | 2.10  |
| macrophage expressed gene 1 [Source:MGI Symbol;Acc:MGI:1333743]                              | -1.24E+00 | 2.36  |
| splA/ryanodine receptor domain and SOCS box containing 4 [Source:MGI Symbol;Acc:MGI:1333743] | -3.40E+00 | 10.54 |
| ring finger protein 31 [Source:MGI Symbol;Acc:MGI:1934704]                                   | 7.90E-01  | -1.73 |
| CD24a antigen [Source:MGI Symbol;Acc:MGI:88323]                                              | -1.26E+00 | 2.39  |
| dual specificity phosphatase 18 [Source:MGI Symbol;Acc:MGI:1922469]                          | -9.66E-01 | 1.95  |
| MIS18 binding protein 1 [Source:MGI Symbol;Acc:MGI:2145099]                                  | -7.68E-01 | 1.70  |
| clathrin, light polypeptide (Lcb) [Source:MGI Symbol;Acc:MGI:1921575]                        | 6.31E-01  | -1.55 |
| autophagy related 16-like 2 (S. cerevisiae) [Source:MGI Symbol;Acc:MGI:1920933]              | 7.22E-01  | -1.65 |
| CD300 molecule like family member F [Source:MGI Symbol;Acc:MGI:2442359]                      | -1.44E+00 | 2.72  |
| teneurin transmembrane protein 4 [Source:MGI Symbol;Acc:MGI:2447063]                         | -3.47E+00 | 11.06 |
| ectonucleoside triphosphate diphosphohydrolase 1 [Source:MGI Symbol;Acc:MGI:2447063]         | -5.94E-01 | 1.51  |
| calcium release activated channel regulator 2B [Source:MGI Symbol;Acc:MGI:24463]             | 1.05E+00  | -2.08 |
| ring finger protein 149 [Source:MGI Symbol;Acc:MGI:2677438]                                  | -7.08E-01 | 1.63  |
| cytoskeleton associated protein 2-like [Source:MGI Symbol;Acc:MGI:1917716]                   | -7.07E-01 | 1.63  |
| vacuolar protein sorting 37C [Source:MGI Symbol;Acc:MGI:2147661]                             | 6.07E-01  | -1.52 |
| hexamethylene bis-acetamide inducible 1 [Source:MGI Symbol;Acc:MGI:2385923]                  | 1.02E+00  | -2.02 |
| brain expressed myelocytomatosis oncogene [Source:MGI Symbol;Acc:MGI:88184]                  | 1.11E+00  | -2.16 |
| family with sequence similarity 110, member B [Source:MGI Symbol;Acc:MGI:19163]              | 9.23E-01  | -1.90 |
| coiled-coil domain containing 71 [Source:MGI Symbol;Acc:MGI:1919704]                         | -6.02E-01 | 1.52  |
| matrix metalloproteinase 12 [Source:MGI Symbol;Acc:MGI:97005]                                | -1.61E+00 | 3.05  |
| NLR family, CARD domain containing 3 [Source:MGI Symbol;Acc:MGI:2444070]                     | -6.68E-01 | 1.59  |
| G protein-coupled receptor 171 [Source:MGI Symbol;Acc:MGI:2442043]                           | -8.03E-01 | 1.74  |
| PEAK1 related kinase activating pseudokinase 1 [Source:MGI Symbol;Acc:MGI:1190]              | 7.11E-01  | -1.64 |
| lectin, galactose binding, soluble 3 [Source:MGI Symbol;Acc:MGI:96778]                       | -6.57E-01 | 1.58  |
| expressed sequence C77080 [Source:MGI Symbol;Acc:MGI:2140651]                                | -1.20E+00 | 2.30  |

|                                                                                                 |           |       |
|-------------------------------------------------------------------------------------------------|-----------|-------|
| matrix metalloproteinase 13 [Source:MGI Symbol;Acc:MGI:1340026]                                 | 1.07E+00  | -2.10 |
| cellular repressor of E1A-stimulated genes 2 [Source:MGI Symbol;Acc:MGI:192833]                 | -1.28E+00 | 2.43  |
| neuron navigator 2 [Source:MGI Symbol;Acc:MGI:2183691]                                          | -8.85E-01 | 1.85  |
| jun B proto-oncogene [Source:MGI Symbol;Acc:MGI:96647]                                          | 1.09E+00  | -2.12 |
| aph1 homolog C, gamma secretase subunit [Source:MGI Symbol;Acc:MGI:1915568]                     | -7.23E-01 | 1.65  |
| suppressor of cytokine signaling 3 [Source:MGI Symbol;Acc:MGI:1201791]                          | 7.56E-01  | -1.69 |
| aldehyde dehydrogenase family 1, subfamily A1 [Source:MGI Symbol;Acc:MGI:135]                   | 1.97E+00  | -3.91 |
| RAB4B, member RAS oncogene family [Source:MGI Symbol;Acc:MGI:105071]                            | 7.65E-01  | -1.70 |
| small cell adhesion glycoprotein [Source:MGI Symbol;Acc:MGI:2448476]                            | 6.22E-01  | -1.54 |
| immediate early response 2 [Source:MGI Symbol;Acc:MGI:104815]                                   | 1.26E+00  | -2.40 |
| zinc finger, AN1-type domain 2A [Source:MGI Symbol;Acc:MGI:2140729]                             | -7.89E-01 | 1.73  |
| lipase, endothelial [Source:MGI Symbol;Acc:MGI:1341803]                                         | -3.92E+00 | 15.19 |
| interferon inducible GTPase 1 [Source:MGI Symbol;Acc:MGI:1926259]                               | 9.22E-01  | -1.89 |
| leukemia inhibitory factor receptor [Source:MGI Symbol;Acc:MGI:96788]                           | 1.19E+00  | -2.28 |
| transmembrane protein 119 [Source:MGI Symbol;Acc:MGI:2385228]                                   | 8.32E-01  | -1.78 |
| Rho family GTPase 1 [Source:MGI Symbol;Acc:MGI:2444878]                                         | 7.88E-01  | -1.73 |
| kelch repeat and BTB (POZ) domain containing 11 [Source:MGI Symbol;Acc:MGI:1926259]             | 1.39E+00  | -2.61 |
| ligase I, DNA, ATP-dependent [Source:MGI Symbol;Acc:MGI:101789]                                 | -6.30E-01 | 1.55  |
| transmembrane protein 154 [Source:MGI Symbol;Acc:MGI:2444725]                                   | -1.27E+00 | 2.42  |
| high mobility group AT-hook 2 [Source:MGI Symbol;Acc:MGI:101761]                                | -4.79E+00 | 27.75 |
| centrosomal protein 162 [Source:MGI Symbol;Acc:MGI:1925343]                                     | -5.94E-01 | 1.51  |
| TatD DNase domain containing 2 [Source:MGI Symbol;Acc:MGI:3576210]                              | -1.17E+00 | 2.25  |
| early B cell factor 1 [Source:MGI Symbol;Acc:MGI:95275]                                         | 1.19E+00  | -2.29 |
| SLP adaptor and CSK interacting membrane protein [Source:MGI Symbol;Acc:MGI:1926467]            | 6.13E-01  | -1.53 |
| Rho GTPase activating protein 24 [Source:MGI Symbol;Acc:MGI:1922647]                            | -1.25E+00 | 2.37  |
| heterogeneous nuclear ribonucleoprotein M [Source:MGI Symbol;Acc:MGI:1926467]                   | 5.96E-01  | -1.51 |
| solute carrier family 14 (urea transporter), member 1 [Source:MGI Symbol;Acc:MGI:1926467]       | 1.09E+00  | -2.13 |
| FXD domain-containing ion transport regulator 2 [Source:MGI Symbol;Acc:MGI:1926467]             | 9.24E-01  | -1.90 |
| farnesyl diphosphate synthetase [Source:MGI Symbol;Acc:MGI:104888]                              | -5.93E-01 | 1.51  |
| protein tyrosine phosphatase 4a3 [Source:MGI Symbol;Acc:MGI:1277098]                            | 8.61E-01  | -1.82 |
| growth factor receptor bound protein 2 [Source:MGI Symbol;Acc:MGI:95805]                        | -6.14E-01 | 1.53  |
| kinesin family member 13B [Source:MGI Symbol;Acc:MGI:1098265]                                   | -7.26E-01 | 1.65  |
| H2A histone family, member J [Source:MGI Symbol;Acc:MGI:3606192]                                | 1.18E+00  | -2.27 |
| ATPase, class I, type 8B, member 4 [Source:MGI Symbol;Acc:MGI:1859664]                          | -9.34E-01 | 1.91  |
| histocompatibility 2, class II antigen E beta [Source:MGI Symbol;Acc:MGI:95901]                 | 1.60E+00  | -3.03 |
| nuclear receptor subfamily 1, group H, member 2 [Source:MGI Symbol;Acc:MGI:1926467]             | 5.90E-01  | -1.51 |
| folliculin interacting protein 2 [Source:MGI Symbol;Acc:MGI:2683054]                            | -1.21E+00 | 2.32  |
| chemokine (C-X-C motif) ligand 12 [Source:MGI Symbol;Acc:MGI:103556]                            | 2.35E+00  | -5.09 |
| glycerophosphodiester phosphodiesterase domain containing 1 [Source:MGI Symbol;Acc:MGI:1926467] | -1.04E+00 | 2.06  |
| phosphoglycerate kinase 1 [Source:MGI Symbol;Acc:MGI:97555]                                     | -7.43E-01 | 1.67  |
| CD200 receptor 4 [Source:MGI Symbol;Acc:MGI:3036289]                                            | -1.38E+00 | 2.61  |
| transmembrane protein 65 [Source:MGI Symbol;Acc:MGI:1922118]                                    | -1.06E+00 | 2.08  |
| Rho GTPase activating protein 22 [Source:MGI Symbol;Acc:MGI:2443418]                            | 7.71E-01  | -1.71 |
| predicted gene 10134 [Source:MGI Symbol;Acc:MGI:3642322]                                        | 1.29E+00  | -2.44 |
| transmembrane protein 42 [Source:MGI Symbol;Acc:MGI:1277176]                                    | 9.08E-01  | -1.88 |
| tectonin beta-propeller repeat containing 1 [Source:MGI Symbol;Acc:MGI:191763]                  | -5.97E-01 | 1.51  |
| transformation related protein 53 inducible protein 11 [Source:MGI Symbol;Acc:MGI:1926467]      | 2.11E+00  | -4.30 |

|                                                                                   |           |       |
|-----------------------------------------------------------------------------------|-----------|-------|
| sortilin 1 [Source:MGI Symbol;Acc:MGI:1338015]                                    | -1.57E+00 | 2.97  |
| spindle apparatus coiled-coil protein 1 [Source:MGI Symbol;Acc:MGI:1917635]       | -8.72E-01 | 1.83  |
| matrix metalloproteinase 27 [Source:MGI Symbol;Acc:MGI:3039232]                   | -1.93E+00 | 3.80  |
| V-set and immunoglobulin domain containing 10 like [Source:MGI Symbol;Acc:MG      | 9.60E-01  | -1.95 |
| leukocyte immunoglobulin-like receptor, subfamily A (with TM domain), member 5    | 1.09E+00  | -2.12 |
| Rho guanine nucleotide exchange factor (GEF) 10 [Source:MGI Symbol;Acc:MGI:24     | 1.61E+00  | -3.06 |
| 5'-nucleotidase domain containing 2 [Source:MGI Symbol;Acc:MGI:1917271]           | -9.85E-01 | 1.98  |
| CCAAT/enhancer binding protein (C/EBP), delta [Source:MGI Symbol;Acc:MGI:103!     | 9.78E-01  | -1.97 |
| colony stimulating factor 2 receptor, beta, low-affinity (granulocyte-macrophage) | -6.45E-01 | 1.56  |
| AHNAK nucleoprotein 2 [Source:MGI Symbol;Acc:MGI:2144831]                         | -1.56E+00 | 2.95  |
| DNA methyltransferase 3A, opposite strand [Source:MGI Symbol;Acc:MGI:364168!      | -1.88E+00 | 3.68  |
| histocompatibility 2, class II antigen A, beta 1 [Source:MGI Symbol;Acc:MGI:10307 | 1.67E+00  | -3.19 |
| SH2 domain containing 1B2 [Source:MGI Symbol;Acc:MGI:3622649]                     | -7.20E-01 | 1.65  |
| WD repeat and FYVE domain containing 1 [Source:MGI Symbol;Acc:MGI:1916618]        | -8.24E-01 | 1.77  |
| ciliogenesis associated TTC17 interacting protein [Source:MGI Symbol;Acc:MGI:26!  | 9.12E-01  | -1.88 |
| post-GPI attachment to proteins 1 [Source:MGI Symbol;Acc:MGI:2443342]             | -6.42E-01 | 1.56  |
| predicted gene 14548 [Source:MGI Symbol;Acc:MGI:3709645]                          | -6.74E-01 | 1.60  |
| plexin C1 [Source:MGI Symbol;Acc:MGI:1890127]                                     | -1.05E+00 | 2.07  |
| selenoprotein M [Source:MGI Symbol;Acc:MGI:2149786]                               | 6.94E-01  | -1.62 |
| predicted gene, 23935 [Source:MGI Symbol;Acc:MGI:5453712]                         | 8.12E-01  | -1.76 |
| immunoglobulin heavy constant mu [Source:MGI Symbol;Acc:MGI:96448]                | 6.76E-01  | -1.60 |
| T cell specific GTPase 2 [Source:MGI Symbol;Acc:MGI:3710083]                      | 6.34E-01  | -1.55 |
| histocompatibility 2, class II, locus Mb1 [Source:MGI Symbol;Acc:MGI:95922]       | 9.44E-01  | -1.92 |
| transmembrane 4 L six family member 19 [Source:MGI Symbol;Acc:MGI:3645933]        | -1.43E+00 | 2.69  |
| UL16 binding protein 1 [Source:MGI Symbol;Acc:MGI:1925027]                        | -8.41E-01 | 1.79  |
| predicted gene 12551 [Source:MGI Symbol;Acc:MGI:3651664]                          | -1.90E+00 | 3.73  |
| predicted gene 14032 [Source:MGI Symbol;Acc:MGI:3650861]                          | -1.08E+00 | 2.11  |
| cathepsin F [Source:MGI Symbol;Acc:MGI:1861434]                                   | 7.31E-01  | -1.66 |
| RIKEN cDNA 4930430E12 gene [Source:MGI Symbol;Acc:MGI:1918889]                    | -1.15E+00 | 2.22  |
| predicted gene 15728 [Source:MGI Symbol;Acc:MGI:3783171]                          | -1.19E+00 | 2.29  |
| predicted gene 13391 [Source:MGI Symbol;Acc:MGI:3651526]                          | -1.30E+00 | 2.45  |
| RIKEN cDNA 2010013B24 gene [Source:MGI Symbol;Acc:MGI:1919329]                    | 9.80E-01  | -1.97 |
| predicted gene 13710 [Source:MGI Symbol;Acc:MGI:3650894]                          | -9.14E-01 | 1.88  |
| predicted gene 15523 [Source:MGI Symbol;Acc:MGI:3782970]                          | 9.53E-01  | -1.94 |
| predicted gene 17056 [Source:MGI Symbol;Acc:MGI:4937883]                          | -1.93E+00 | 3.81  |
| apolipoprotein L domain containing 1 [Source:MGI Symbol;Acc:MGI:2685921]          | -1.36E+00 | 2.56  |
| predicted gene 20513 [Source:MGI Symbol;Acc:MGI:5141978]                          | 2.25E+00  | -4.77 |
| signal-regulatory protein beta 1B [Source:MGI Symbol;Acc:MGI:3779828]             | -8.07E-01 | 1.75  |
| membrane-spanning 4-domains, subfamily A, member 4A [Source:MGI Symbol;Acc        | 9.38E-01  | -1.92 |

| Cl.L     | Cl.R      | AveExpr  | t        | P.Value  | adj.P.Val |
|----------|-----------|----------|----------|----------|-----------|
| 0.591805 | 1.18E+00  | 5.747895 | 6.133159 | 5.44E-07 | 8.63E-05  |
| 1.009373 | 1.93E+00  | 3.836669 | 6.467016 | 2.00E-07 | 4.08E-05  |
| 0.350658 | 8.94E-01  | 4.216671 | 4.650931 | 4.71E-05 | 2.27E-03  |
| 0.309613 | 1.08E+00  | 5.071944 | 3.671168 | 8.10E-04 | 1.43E-02  |
| -1.61515 | -7.88E-01 | 4.056303 | -5.90199 | 1.09E-06 | 1.49E-04  |
| -1.1157  | -3.09E-01 | 7.649212 | -3.59026 | 1.02E-03 | 1.61E-02  |
| -0.85868 | -3.27E-01 | 4.865249 | -4.52972 | 6.74E-05 | 2.88E-03  |
| 1.263598 | 3.42E+00  | 1.722442 | 4.413132 | 9.52E-05 | 3.66E-03  |
| -1.55703 | -5.16E-01 | 2.038653 | -4.04449 | 2.79E-04 | 7.32E-03  |
| 0.341402 | 1.21E+00  | 3.908578 | 3.63384  | 8.99E-04 | 1.51E-02  |
| -1.56057 | -5.98E-01 | 2.72116  | -4.55145 | 6.32E-05 | 2.77E-03  |
| -1.34267 | -5.13E-01 | 4.744025 | -4.5433  | 6.48E-05 | 2.81E-03  |
| 0.699555 | 2.23E+00  | 5.522247 | 3.893269 | 4.31E-04 | 9.50E-03  |
| 0.496252 | 1.06E+00  | 7.332156 | 5.610444 | 2.63E-06 | 3.13E-04  |
| 0.318085 | 1.04E+00  | 5.206772 | 3.822495 | 5.28E-04 | 1.09E-02  |
| 0.457819 | 1.51E+00  | 2.718585 | 3.803937 | 5.56E-04 | 1.12E-02  |
| -2.01393 | -6.03E-01 | 0.768338 | -3.76598 | 6.20E-04 | 1.20E-02  |
| 0.365072 | 1.14E+00  | 5.000535 | 3.945745 | 3.71E-04 | 8.57E-03  |
| 0.515599 | 1.23E+00  | 13.74116 | 4.978659 | 1.77E-05 | 1.21E-03  |
| 0.359504 | 9.91E-01  | 4.877486 | 4.341853 | 1.17E-04 | 4.17E-03  |
| 0.287233 | 9.21E-01  | 5.048124 | 3.872754 | 4.57E-04 | 9.88E-03  |
| 0.515356 | 1.27E+00  | 4.033591 | 4.807309 | 2.95E-05 | 1.67E-03  |
| -1.07956 | -5.84E-01 | 9.89234  | -6.81791 | 7.04E-08 | 1.81E-05  |
| 0.424403 | 1.43E+00  | 2.943782 | 3.74448  | 6.59E-04 | 1.25E-02  |
| 0.343851 | 1.25E+00  | 6.195432 | 3.566037 | 1.09E-03 | 1.66E-02  |
| -1.1192  | -4.45E-01 | 4.174918 | -4.71154 | 3.93E-05 | 2.00E-03  |
| -2.05564 | -1.19E+00 | 4.72937  | -7.65371 | 6.11E-09 | 2.71E-06  |
| 0.530938 | 1.62E+00  | 3.266999 | 4.011318 | 3.07E-04 | 7.59E-03  |
| 0.447248 | 1.06E+00  | 4.534839 | 5.011952 | 1.60E-05 | 1.12E-03  |
| 0.538374 | 1.55E+00  | 4.455016 | 4.199013 | 1.78E-04 | 5.48E-03  |
| -0.98858 | -3.77E-01 | 7.539815 | -4.53667 | 6.61E-05 | 2.85E-03  |
| 0.46575  | 1.49E+00  | 5.649878 | 3.8871   | 4.39E-04 | 9.63E-03  |
| -1.40852 | -7.95E-01 | 5.98313  | -7.28993 | 1.76E-08 | 6.26E-06  |
| -1.21352 | -3.83E-01 | 5.603849 | -3.90315 | 4.19E-04 | 9.28E-03  |
| -1.20626 | -4.63E-01 | 5.471378 | -4.56337 | 6.10E-05 | 2.70E-03  |
| 0.360096 | 9.04E-01  | 8.371466 | 4.722644 | 3.80E-05 | 1.97E-03  |
| 0.587066 | 1.46E+00  | 3.930582 | 4.751196 | 3.49E-05 | 1.85E-03  |
| -0.89856 | -3.99E-01 | 5.596125 | -5.27725 | 7.19E-06 | 6.28E-04  |
| -3.46964 | -1.22E+00 | 1.578886 | -4.22501 | 1.65E-04 | 5.20E-03  |
| -3.03141 | -1.02E+00 | -0.01437 | -4.08924 | 2.45E-04 | 6.73E-03  |
| 0.362877 | 1.20E+00  | 3.668541 | 3.792103 | 5.75E-04 | 1.15E-02  |
| 0.31238  | 9.24E-01  | 6.82097  | 4.106229 | 2.34E-04 | 6.43E-03  |
| 0.348232 | 1.05E+00  | 2.562223 | 4.037903 | 2.85E-04 | 7.37E-03  |
| -1.11425 | -3.95E-01 | 3.723236 | -4.26074 | 1.49E-04 | 4.84E-03  |
| 0.504022 | 1.09E+00  | 5.098164 | 5.513746 | 3.52E-06 | 3.62E-04  |
| 0.569701 | 1.38E+00  | 3.742057 | 4.889911 | 2.30E-05 | 1.44E-03  |

|          |           |          |          |          |          |
|----------|-----------|----------|----------|----------|----------|
| -1.74736 | -5.66E-01 | 1.351976 | -3.97719 | 3.39E-04 | 8.11E-03 |
| 0.663124 | 2.26E+00  | 1.108752 | 3.717967 | 7.10E-04 | 1.31E-02 |
| 0.384571 | 1.03E+00  | 5.114864 | 4.459154 | 8.31E-05 | 3.39E-03 |
| 0.365892 | 1.39E+00  | 3.94642  | 3.479529 | 1.38E-03 | 1.96E-02 |
| 0.452628 | 1.35E+00  | 7.86443  | 4.073896 | 2.57E-04 | 6.95E-03 |
| -1.5174  | -9.77E-01 | 12.80922 | -9.37003 | 5.17E-11 | 9.45E-08 |
| 0.298204 | 1.00E+00  | 4.609663 | 3.749396 | 6.49E-04 | 1.23E-02 |
| 0.704751 | 1.48E+00  | 4.487429 | 5.704931 | 1.98E-06 | 2.45E-04 |
| 0.453691 | 1.09E+00  | 8.143032 | 4.92263  | 2.09E-05 | 1.36E-03 |
| -1.04897 | -4.07E-01 | 7.278768 | -4.60912 | 5.33E-05 | 2.43E-03 |
| 0.84015  | 3.19E+00  | 2.171235 | 3.481616 | 1.37E-03 | 1.95E-02 |
| 0.550702 | 1.42E+00  | 8.634719 | 4.605024 | 5.39E-05 | 2.45E-03 |
| 0.332387 | 9.38E-01  | 5.765065 | 4.258873 | 1.50E-04 | 4.84E-03 |
| -1.07454 | -3.26E-01 | 3.458756 | -3.80042 | 5.62E-04 | 1.13E-02 |
| -1.59667 | -9.50E-01 | 5.423686 | -7.99219 | 2.32E-09 | 1.29E-06 |
| 0.344902 | 1.06E+00  | 5.596274 | 4.000347 | 3.17E-04 | 7.77E-03 |
| 1.106337 | 2.67E+00  | 0.943729 | 4.901939 | 2.22E-05 | 1.42E-03 |
| -1.36822 | -3.94E-01 | 3.088145 | -3.67289 | 8.06E-04 | 1.42E-02 |
| 0.322945 | 1.13E+00  | 2.49004  | 3.656669 | 8.43E-04 | 1.46E-02 |
| 0.350289 | 1.07E+00  | 6.378284 | 3.994661 | 3.23E-04 | 7.84E-03 |
| -1.06923 | -3.15E-01 | 2.85974  | -3.72952 | 6.87E-04 | 1.28E-02 |
| 0.398863 | 8.00E-01  | 7.225838 | 6.06565  | 6.67E-07 | 1.01E-04 |
| -0.91225 | -3.36E-01 | 3.57021  | -4.40029 | 9.89E-05 | 3.71E-03 |
| -1.67972 | -6.02E-01 | 3.388681 | -4.30186 | 1.32E-04 | 4.42E-03 |
| -2.93388 | -1.42E+00 | 2.043032 | -5.82759 | 1.37E-06 | 1.83E-04 |
| 0.526355 | 1.73E+00  | 1.18671  | 3.804434 | 5.56E-04 | 1.12E-02 |
| -1.23624 | -4.81E-01 | 5.733443 | -4.61513 | 5.23E-05 | 2.42E-03 |
| 0.428789 | 7.56E-01  | 6.588344 | 7.350372 | 1.47E-08 | 5.40E-06 |
| -1.96007 | -6.09E-01 | 1.559694 | -3.86047 | 4.74E-04 | 1.01E-02 |
| -1.47648 | -5.07E-01 | 1.403462 | -4.15864 | 2.01E-04 | 5.87E-03 |
| 0.904389 | 2.10E+00  | 3.458534 | 5.104979 | 1.21E-05 | 9.27E-04 |
| 0.367935 | 9.36E-01  | 4.79443  | 4.664232 | 4.52E-05 | 2.20E-03 |
| -1.35935 | -5.22E-01 | 4.301322 | -4.56726 | 6.03E-05 | 2.69E-03 |
| 1.281473 | 3.13E+00  | 4.214619 | 4.851921 | 2.58E-05 | 1.54E-03 |
| 0.271397 | 9.76E-01  | 4.602715 | 3.595419 | 1.00E-03 | 1.60E-02 |
| 0.57984  | 2.08E+00  | 0.038067 | 3.599992 | 9.88E-04 | 1.59E-02 |
| 0.341499 | 1.10E+00  | 6.400787 | 3.861638 | 4.72E-04 | 1.01E-02 |
| -1.45155 | -7.88E-01 | 8.441911 | -6.86062 | 6.21E-08 | 1.70E-05 |
| 0.300771 | 1.01E+00  | 3.620722 | 3.75356  | 6.42E-04 | 1.23E-02 |
| 1.055466 | 3.34E+00  | 0.069849 | 3.910989 | 4.10E-04 | 9.19E-03 |
| 0.413923 | 1.24E+00  | 4.07433  | 4.06074  | 2.67E-04 | 7.11E-03 |
| 0.309034 | 9.27E-01  | 5.854981 | 4.063146 | 2.65E-04 | 7.08E-03 |
| -1.42785 | -7.85E-01 | 7.828277 | -6.99255 | 4.20E-08 | 1.28E-05 |
| -1.42539 | -7.71E-01 | 4.531001 | -6.81972 | 7.01E-08 | 1.81E-05 |
| -1.41164 | -5.80E-01 | 3.31251  | -4.86104 | 2.51E-05 | 1.51E-03 |
| -1.50369 | -5.52E-01 | 2.29698  | -4.38788 | 1.03E-04 | 3.79E-03 |
| -1.07922 | -2.91E-01 | 3.00851  | -3.53336 | 1.19E-03 | 1.76E-02 |

|          |           |          |          |          |          |
|----------|-----------|----------|----------|----------|----------|
| -1.56527 | -7.30E-01 | 4.318895 | -5.58526 | 2.84E-06 | 3.28E-04 |
| -0.86106 | -4.19E-01 | 9.03696  | -5.87612 | 1.18E-06 | 1.59E-04 |
| 0.490827 | 1.47E+00  | 2.897842 | 4.071823 | 2.58E-04 | 6.97E-03 |
| 0.407816 | 1.09E+00  | 5.353986 | 4.472681 | 7.98E-05 | 3.28E-03 |
| 0.815338 | 2.87E+00  | 1.27798  | 3.63962  | 8.84E-04 | 1.51E-02 |
| -2.7269  | -7.40E-01 | 0.384796 | -3.54486 | 1.15E-03 | 1.72E-02 |
| -1.40366 | -7.63E-01 | 5.868418 | -6.8639  | 6.15E-08 | 1.70E-05 |
| 0.277645 | 9.00E-01  | 5.322276 | 3.842328 | 4.99E-04 | 1.05E-02 |
| 0.556899 | 1.61E+00  | 2.601693 | 4.172756 | 1.93E-04 | 5.72E-03 |
| 0.458234 | 1.60E+00  | 2.215258 | 3.654827 | 8.47E-04 | 1.46E-02 |
| -1.48083 | -5.22E-01 | 3.486127 | -4.2421  | 1.57E-04 | 5.00E-03 |
| -1.35939 | -6.21E-01 | 4.275365 | -5.44525 | 4.33E-06 | 4.28E-04 |
| 0.405571 | 1.04E+00  | 5.248577 | 4.62414  | 5.10E-05 | 2.37E-03 |
| -1.0215  | -2.71E-01 | 2.671668 | -3.49622 | 1.32E-03 | 1.90E-02 |
| -5.20544 | -1.44E+00 | 0.337698 | -3.57928 | 1.05E-03 | 1.63E-02 |
| -1.52401 | -6.85E-01 | 5.655235 | -5.35143 | 5.75E-06 | 5.26E-04 |
| -1.15995 | -7.45E-01 | 6.672806 | -9.32149 | 5.89E-11 | 9.45E-08 |
| 0.455048 | 1.67E+00  | 1.655079 | 3.558296 | 1.11E-03 | 1.68E-02 |
| -1.17527 | -3.51E-01 | 3.417095 | -3.76039 | 6.30E-04 | 1.21E-02 |
| 0.687445 | 2.25E+00  | 1.835852 | 3.821044 | 5.30E-04 | 1.09E-02 |
| -1.41946 | -5.69E-01 | 5.846627 | -4.75211 | 3.48E-05 | 1.85E-03 |
| 0.52478  | 1.48E+00  | 1.58534  | 4.270291 | 1.45E-04 | 4.75E-03 |
| -1.12031 | -4.91E-01 | 5.86017  | -5.20261 | 9.01E-06 | 7.32E-04 |
| 0.5692   | 1.52E+00  | 1.705394 | 4.455554 | 8.40E-05 | 3.41E-03 |
| -1.93442 | -5.37E-01 | 5.100909 | -3.59191 | 1.01E-03 | 1.61E-02 |
| 0.554967 | 1.30E+00  | 6.522113 | 5.053087 | 1.41E-05 | 1.04E-03 |
| -2.32287 | -8.93E-01 | 0.704607 | -4.56631 | 6.05E-05 | 2.69E-03 |
| 1.012008 | 2.93E+00  | 0.572589 | 4.177306 | 1.90E-04 | 5.69E-03 |
| 0.437153 | 1.50E+00  | 3.564655 | 3.703437 | 7.39E-04 | 1.34E-02 |
| -0.99278 | -3.37E-01 | 3.664833 | -4.1197  | 2.25E-04 | 6.34E-03 |
| -1.50373 | -4.19E-01 | 6.094971 | -3.59765 | 9.94E-04 | 1.60E-02 |
| -1.07726 | -3.45E-01 | 4.491494 | -3.94584 | 3.71E-04 | 8.57E-03 |
| -4.01944 | -1.53E+00 | -0.37652 | -4.51735 | 7.00E-05 | 2.96E-03 |
| 0.456045 | 1.42E+00  | 3.007532 | 3.949465 | 3.67E-04 | 8.54E-03 |
| 0.702904 | 1.59E+00  | 6.830025 | 5.261261 | 7.55E-06 | 6.51E-04 |
| 0.2887   | 1.07E+00  | 3.930751 | 3.529268 | 1.20E-03 | 1.78E-02 |
| 0.284944 | 1.02E+00  | 4.546053 | 3.610644 | 9.59E-04 | 1.55E-02 |
| -1.20483 | -4.72E-01 | 2.705486 | -4.6443  | 4.80E-05 | 2.30E-03 |
| -1.00961 | -4.72E-01 | 6.046648 | -5.60267 | 2.69E-06 | 3.17E-04 |
| 0.695027 | 2.50E+00  | 1.821206 | 3.597367 | 9.95E-04 | 1.60E-02 |
| 0.340327 | 1.17E+00  | 6.087183 | 3.698625 | 7.49E-04 | 1.35E-02 |
| -1.54101 | -5.03E-01 | 1.544096 | -3.99955 | 3.18E-04 | 7.77E-03 |
| -1.90167 | -7.01E-01 | 3.930597 | -4.40277 | 9.81E-05 | 3.70E-03 |
| -1.68491 | -5.62E-01 | 2.424432 | -4.0654  | 2.63E-04 | 7.06E-03 |
| 1.311404 | 4.30E+00  | 3.478963 | 3.810961 | 5.45E-04 | 1.11E-02 |
| -2.81578 | -8.22E-01 | 0.353846 | -3.7052  | 7.36E-04 | 1.34E-02 |
| -1.07108 | -3.39E-01 | 3.410378 | -3.91469 | 4.06E-04 | 9.11E-03 |

|          |           |          |          |          |          |
|----------|-----------|----------|----------|----------|----------|
| -1.12551 | -3.74E-01 | 2.203496 | -4.05193 | 2.73E-04 | 7.21E-03 |
| 0.333406 | 1.17E+00  | 2.077998 | 3.654354 | 8.49E-04 | 1.46E-02 |
| -1.21461 | -5.66E-01 | 5.823696 | -5.57757 | 2.91E-06 | 3.33E-04 |
| -1.31091 | -5.09E-01 | 4.593328 | -4.61344 | 5.26E-05 | 2.42E-03 |
| -0.88661 | -2.83E-01 | 4.095862 | -3.94039 | 3.77E-04 | 8.69E-03 |
| 0.599871 | 1.39E+00  | 4.32816  | 5.132134 | 1.11E-05 | 8.66E-04 |
| -1.17639 | -3.42E-01 | 2.661535 | -3.69439 | 7.58E-04 | 1.36E-02 |
| -0.99394 | -3.38E-01 | 5.624394 | -4.1232  | 2.22E-04 | 6.32E-03 |
| 0.522899 | 1.43E+00  | 4.774224 | 4.381025 | 1.05E-04 | 3.86E-03 |
| 0.452392 | 1.57E+00  | 2.116941 | 3.669354 | 8.14E-04 | 1.43E-02 |
| 0.769023 | 1.50E+00  | 4.923927 | 6.311553 | 3.19E-07 | 5.93E-05 |
| 0.540008 | 1.63E+00  | 3.743534 | 4.042848 | 2.81E-04 | 7.34E-03 |
| 0.441555 | 1.01E+00  | 5.625283 | 5.199816 | 9.08E-06 | 7.33E-04 |
| -0.84029 | -3.39E-01 | 7.370693 | -4.77486 | 3.25E-05 | 1.76E-03 |
| 1.085801 | 2.62E+00  | 6.018032 | 4.905617 | 2.20E-05 | 1.42E-03 |
| -1.32738 | -7.24E-01 | 5.256573 | -6.89857 | 5.55E-08 | 1.58E-05 |
| -6.44225 | -1.84E+00 | -2.17182 | -3.65553 | 8.46E-04 | 1.46E-02 |
| -1.21151 | -6.19E-01 | 5.970732 | -6.26981 | 3.61E-07 | 6.53E-05 |
| 0.825869 | 1.51E+00  | 5.807365 | 6.949501 | 4.77E-08 | 1.39E-05 |
| 0.445778 | 1.08E+00  | 5.617916 | 4.890492 | 2.30E-05 | 1.44E-03 |
| -1.89238 | -7.99E-01 | 1.087568 | -4.99812 | 1.67E-05 | 1.16E-03 |
| 0.317987 | 1.12E+00  | 3.277592 | 3.633534 | 9.00E-04 | 1.51E-02 |
| -1.10671 | -4.73E-01 | 4.036529 | -5.0676  | 1.35E-05 | 1.02E-03 |
| 0.577227 | 1.47E+00  | 2.417572 | 4.650397 | 4.71E-05 | 2.27E-03 |
| -1.35154 | -6.18E-01 | 3.926363 | -5.45169 | 4.25E-06 | 4.26E-04 |
| 0.607452 | 2.16E+00  | 0.853395 | 3.622268 | 9.28E-04 | 1.53E-02 |
| -1.0316  | -2.73E-01 | 4.268921 | -3.49294 | 1.33E-03 | 1.91E-02 |
| -1.13874 | -3.00E-01 | 2.290148 | -3.4833  | 1.37E-03 | 1.95E-02 |
| 0.775292 | 2.43E+00  | 7.095932 | 3.929408 | 3.89E-04 | 8.87E-03 |
| -1.71155 | -5.14E-01 | 1.178004 | -3.77561 | 6.03E-04 | 1.18E-02 |
| -1.89418 | -1.11E+00 | 5.27277  | -7.81411 | 3.86E-09 | 1.90E-06 |
| -1.05788 | -3.80E-01 | 3.277061 | -4.31272 | 1.28E-04 | 4.36E-03 |
| 0.473908 | 1.67E+00  | 1.802418 | 3.63756  | 8.89E-04 | 1.51E-02 |
| 0.839893 | 1.22E+00  | 8.707199 | 10.91703 | 9.68E-13 | 1.24E-08 |
| -1.17409 | -3.92E-01 | 3.712243 | -4.06919 | 2.60E-04 | 7.00E-03 |
| 0.287712 | 9.46E-01  | 4.416889 | 3.805417 | 5.54E-04 | 1.12E-02 |
| -2.08474 | -6.20E-01 | 0.014841 | -3.75218 | 6.44E-04 | 1.23E-02 |
| -1.98615 | -1.05E+00 | 4.628707 | -6.54707 | 1.58E-07 | 3.49E-05 |
| 0.865485 | 3.17E+00  | 0.339622 | 3.557802 | 1.11E-03 | 1.68E-02 |
| -4.8354  | -3.08E+00 | 4.140478 | -9.12829 | 9.90E-11 | 1.27E-07 |
| 0.422826 | 8.57E-01  | 8.130402 | 5.983923 | 8.53E-07 | 1.24E-04 |
| -1.33786 | -4.60E-01 | 3.656487 | -4.15945 | 2.00E-04 | 5.87E-03 |
| 0.415658 | 1.34E+00  | 3.142631 | 3.848276 | 4.91E-04 | 1.04E-02 |
| 0.51044  | 1.72E+00  | 1.744842 | 3.750639 | 6.47E-04 | 1.23E-02 |
| 0.337047 | 9.95E-01  | 2.51766  | 4.113255 | 2.29E-04 | 6.39E-03 |
| 0.613767 | 2.22E+00  | 2.426594 | 3.586609 | 1.03E-03 | 1.61E-02 |
| 0.605079 | 1.47E+00  | 5.841565 | 4.864563 | 2.49E-05 | 1.51E-03 |

|          |           |          |          |          |          |
|----------|-----------|----------|----------|----------|----------|
| 0.474363 | 1.68E+00  | 2.375107 | 3.628018 | 9.14E-04 | 1.52E-02 |
| 0.273407 | 9.71E-01  | 4.601932 | 3.62406  | 9.24E-04 | 1.53E-02 |
| -0.86326 | -4.00E-01 | 4.414336 | -5.54299 | 3.23E-06 | 3.53E-04 |
| 0.349617 | 9.37E-01  | 4.448757 | 4.447707 | 8.60E-05 | 3.47E-03 |
| 0.783723 | 2.85E+00  | 3.416933 | 3.568255 | 1.08E-03 | 1.66E-02 |
| -1.34552 | -4.96E-01 | 3.201238 | -4.40653 | 9.71E-05 | 3.68E-03 |
| 1.097061 | 1.69E+00  | 14.89458 | 9.506141 | 3.60E-11 | 9.45E-08 |
| 0.296681 | 9.21E-01  | 5.648399 | 3.960397 | 3.56E-04 | 8.31E-03 |
| -1.25367 | -3.34E-01 | 3.911817 | -3.50675 | 1.28E-03 | 1.86E-02 |
| -1.05063 | -4.29E-01 | 9.839848 | -4.82988 | 2.76E-05 | 1.60E-03 |
| -0.80937 | -4.05E-01 | 10.01536 | -6.10776 | 5.88E-07 | 9.20E-05 |
| -1.7296  | -6.11E-01 | 2.26819  | -4.25096 | 1.53E-04 | 4.92E-03 |
| -1.04447 | -3.55E-01 | 3.597935 | -4.11858 | 2.25E-04 | 6.34E-03 |
| 1.008012 | 3.08E+00  | 1.927659 | 4.011734 | 3.07E-04 | 7.59E-03 |
| 0.551869 | 1.53E+00  | 1.713454 | 4.327485 | 1.22E-04 | 4.25E-03 |
| 0.330096 | 1.17E+00  | 6.523862 | 3.634889 | 8.96E-04 | 1.51E-02 |
| -1.4938  | -6.98E-01 | 3.781469 | -5.59311 | 2.77E-06 | 3.24E-04 |
| 0.416332 | 1.12E+00  | 3.854759 | 4.422212 | 9.27E-05 | 3.61E-03 |
| 0.383835 | 1.19E+00  | 3.616014 | 3.963457 | 3.53E-04 | 8.28E-03 |
| 0.340704 | 1.08E+00  | 3.326446 | 3.908016 | 4.14E-04 | 9.24E-03 |
| -1.01715 | -5.04E-01 | 4.394986 | -6.01385 | 7.80E-07 | 1.15E-04 |
| 0.349011 | 1.22E+00  | 3.225712 | 3.663184 | 8.28E-04 | 1.44E-02 |
| 0.490527 | 1.32E+00  | 4.636422 | 4.430757 | 9.04E-05 | 3.56E-03 |
| 0.665346 | 1.57E+00  | 4.857348 | 5.026764 | 1.53E-05 | 1.09E-03 |
| 0.365974 | 1.14E+00  | 2.916214 | 3.946201 | 3.71E-04 | 8.57E-03 |
| -1.36457 | -7.31E-01 | 8.002686 | -6.7209  | 9.39E-08 | 2.27E-05 |
| -1.20642 | -3.98E-01 | 4.397065 | -4.03332 | 2.89E-04 | 7.41E-03 |
| 0.370783 | 1.09E+00  | 4.696996 | 4.110884 | 2.30E-04 | 6.39E-03 |
| -1.70387 | -7.76E-01 | 4.561139 | -5.42589 | 4.59E-06 | 4.47E-04 |
| 0.326647 | 1.16E+00  | 3.357556 | 3.617689 | 9.40E-04 | 1.54E-02 |
| -3.10372 | -8.75E-01 | 0.531086 | -3.6264  | 9.18E-04 | 1.52E-02 |
| -1.52447 | -5.66E-01 | 1.747778 | -4.43116 | 9.03E-05 | 3.56E-03 |
| -3.41062 | -2.21E+00 | 3.937147 | -9.46205 | 4.05E-11 | 9.45E-08 |
| -2.5025  | -9.05E-01 | 0.386519 | -4.33335 | 1.20E-04 | 4.22E-03 |
| 0.937617 | 3.34E+00  | 4.415347 | 3.616717 | 9.43E-04 | 1.54E-02 |
| -2.08902 | -6.33E-01 | 2.811509 | -3.79653 | 5.68E-04 | 1.13E-02 |
| 0.454142 | 1.70E+00  | 1.026273 | 3.507286 | 1.28E-03 | 1.86E-02 |
| 0.297696 | 9.01E-01  | 5.800767 | 4.036927 | 2.86E-04 | 7.37E-03 |
| 0.479904 | 1.24E+00  | 6.767257 | 4.601525 | 5.45E-05 | 2.46E-03 |
| 0.399407 | 1.02E+00  | 2.982223 | 4.630408 | 5.00E-05 | 2.36E-03 |
| -0.88394 | -4.42E-01 | 8.893231 | -6.09996 | 6.02E-07 | 9.30E-05 |
| 0.509508 | 1.29E+00  | 8.88743  | 4.686056 | 4.24E-05 | 2.11E-03 |
| -1.45808 | -4.76E-01 | 3.46149  | -3.99694 | 3.20E-04 | 7.80E-03 |
| 0.548568 | 1.10E+00  | 4.160396 | 6.073065 | 6.52E-07 | 9.97E-05 |
| 0.407916 | 1.09E+00  | 4.118777 | 4.445693 | 8.65E-05 | 3.47E-03 |
| -0.96478 | -4.98E-01 | 8.480108 | -6.37182 | 2.66E-07 | 5.12E-05 |
| -1.09234 | -3.53E-01 | 3.205772 | -3.96994 | 3.46E-04 | 8.18E-03 |



|          |           |          |          |          |          |
|----------|-----------|----------|----------|----------|----------|
| 0.843775 | 1.52E+00  | 3.322873 | 7.090304 | 3.15E-08 | 1.01E-05 |
| -1.90777 | -6.84E-01 | 2.042064 | -4.30048 | 1.33E-04 | 4.43E-03 |
| -1.65907 | -6.23E-01 | 2.917449 | -4.47252 | 7.99E-05 | 3.28E-03 |
| -1.51169 | -5.49E-01 | 2.966606 | -4.34536 | 1.16E-04 | 4.17E-03 |
| 0.397013 | 1.31E+00  | 4.891465 | 3.803351 | 5.57E-04 | 1.12E-02 |
| -1.5287  | -5.80E-01 | 1.931015 | -4.51537 | 7.04E-05 | 2.97E-03 |
| -8.97002 | -5.61E+00 | 0.982612 | -8.80393 | 2.40E-10 | 2.56E-07 |
| 0.657488 | 1.24E+00  | 3.68954  | 6.593052 | 1.37E-07 | 3.15E-05 |
| 0.71516  | 1.65E+00  | 2.620158 | 5.141648 | 1.08E-05 | 8.56E-04 |
| 0.335383 | 1.21E+00  | 3.526201 | 3.59281  | 1.01E-03 | 1.60E-02 |
| 0.398486 | 1.36E+00  | 1.674371 | 3.721069 | 7.03E-04 | 1.31E-02 |
| -3.59511 | -1.44E+00 | 1.591773 | -4.73439 | 3.67E-05 | 1.91E-03 |
| -1.40023 | -4.10E-01 | 2.157506 | -3.71351 | 7.19E-04 | 1.32E-02 |
| -1.62713 | -7.35E-01 | 4.404841 | -5.37879 | 5.29E-06 | 4.92E-04 |
| -1.75597 | -5.03E-01 | 1.778533 | -3.65997 | 8.35E-04 | 1.45E-02 |
| -1.53475 | -5.70E-01 | 2.569625 | -4.43444 | 8.94E-05 | 3.56E-03 |
| -1.51656 | -5.42E-01 | 3.19679  | -4.29326 | 1.35E-04 | 4.50E-03 |
| 0.344589 | 1.05E+00  | 7.086608 | 4.018328 | 3.01E-04 | 7.51E-03 |
| -1.10576 | -6.18E-01 | 8.128303 | -7.18719 | 2.37E-08 | 7.81E-06 |
| -1.07631 | -2.91E-01 | 2.821297 | -3.53728 | 1.18E-03 | 1.74E-02 |
| 0.395845 | 1.34E+00  | 4.403265 | 3.732417 | 6.81E-04 | 1.28E-02 |
| -1.41645 | -6.25E-01 | 4.277959 | -5.24231 | 7.99E-06 | 6.72E-04 |
| -1.28129 | -5.45E-01 | 3.644146 | -5.0403  | 1.47E-05 | 1.07E-03 |
| 0.826894 | 2.72E+00  | 4.715461 | 3.805023 | 5.55E-04 | 1.12E-02 |
| -2.28453 | -1.15E+00 | 5.456974 | -6.13759 | 5.37E-07 | 8.63E-05 |
| -1.08558 | -3.57E-01 | 3.268172 | -4.02549 | 2.95E-04 | 7.49E-03 |
| -0.89088 | -5.06E-01 | 7.633183 | -7.37161 | 1.38E-08 | 5.23E-06 |
| -1.19202 | -4.12E-01 | 3.365492 | -4.17936 | 1.89E-04 | 5.68E-03 |
| 0.340182 | 8.44E-01  | 7.619913 | 4.775678 | 3.24E-05 | 1.76E-03 |
| -1.05384 | -3.35E-01 | 2.810248 | -3.92491 | 3.94E-04 | 8.92E-03 |
| -0.9163  | -2.71E-01 | 4.532229 | -3.73995 | 6.67E-04 | 1.25E-02 |
| 0.516469 | 1.12E+00  | 5.401212 | 5.532936 | 3.33E-06 | 3.53E-04 |
| -1.99583 | -1.16E+00 | 4.070583 | -7.70615 | 5.26E-09 | 2.41E-06 |
| 0.452489 | 1.52E+00  | 5.879973 | 3.759015 | 6.32E-04 | 1.21E-02 |
| 0.370938 | 1.04E+00  | 2.884624 | 4.271603 | 1.44E-04 | 4.75E-03 |
| 0.718188 | 1.76E+00  | 5.95453  | 4.840798 | 2.67E-05 | 1.58E-03 |
| -1.44417 | -4.92E-01 | 3.011126 | -4.13035 | 2.18E-04 | 6.21E-03 |
| -1.27662 | -4.24E-01 | 3.028591 | -4.04767 | 2.77E-04 | 7.27E-03 |
| -1.38693 | -4.14E-01 | 4.75628  | -3.76199 | 6.27E-04 | 1.21E-02 |
| -2.92848 | -1.44E+00 | 5.967586 | -5.96353 | 9.07E-07 | 1.29E-04 |
| -1.16096 | -5.27E-01 | 3.740482 | -5.41222 | 4.79E-06 | 4.59E-04 |
| -1.00656 | -3.43E-01 | 5.309911 | -4.13424 | 2.15E-04 | 6.17E-03 |
| -3.17639 | -1.93E+00 | 2.474958 | -8.33141 | 8.89E-10 | 7.14E-07 |
| 0.277807 | 9.89E-01  | 3.649886 | 3.619003 | 9.37E-04 | 1.54E-02 |
| -0.99962 | -5.62E-01 | 10.66663 | -7.2518  | 1.96E-08 | 6.81E-06 |
| -2.05404 | -6.55E-01 | 0.423719 | -3.934   | 3.84E-04 | 8.80E-03 |
| -1.04831 | -3.52E-01 | 3.653535 | -4.08266 | 2.50E-04 | 6.80E-03 |

|          |           |          |          |          |          |
|----------|-----------|----------|----------|----------|----------|
| 0.408962 | 1.25E+00  | 4.466033 | 4.013698 | 3.05E-04 | 7.58E-03 |
| -1.31459 | -5.42E-01 | 3.373781 | -4.88183 | 2.36E-05 | 1.47E-03 |
| -2.05763 | -7.43E-01 | 1.780551 | -4.32703 | 1.23E-04 | 4.25E-03 |
| -1.27659 | -5.42E-01 | 3.876703 | -5.02958 | 1.52E-05 | 1.09E-03 |
| -1.21425 | -3.94E-01 | 4.677693 | -3.98391 | 3.33E-04 | 8.01E-03 |
| 0.493713 | 1.13E+00  | 4.260774 | 5.168401 | 9.98E-06 | 7.96E-04 |
| 0.349205 | 1.06E+00  | 3.452059 | 4.04061  | 2.82E-04 | 7.35E-03 |
| 0.304739 | 8.90E-01  | 6.106928 | 4.14782  | 2.07E-04 | 5.99E-03 |
| 0.351335 | 1.12E+00  | 3.346953 | 3.876799 | 4.52E-04 | 9.84E-03 |
| 0.304635 | 1.15E+00  | 3.176789 | 3.501057 | 1.30E-03 | 1.88E-02 |
| -1.00728 | -3.53E-01 | 4.942039 | -4.22159 | 1.67E-04 | 5.21E-03 |
| -2.40891 | -6.78E-01 | 10.71211 | -3.62216 | 9.29E-04 | 1.53E-02 |
| 0.400594 | 1.00E+00  | 5.102148 | 4.745214 | 3.55E-05 | 1.87E-03 |
| -1.04561 | -3.42E-01 | 3.737702 | -4.00403 | 3.14E-04 | 7.70E-03 |
| 0.383045 | 1.38E+00  | 1.550989 | 3.596045 | 9.99E-04 | 1.60E-02 |
| -1.10206 | -4.07E-01 | 3.646663 | -4.40926 | 9.63E-05 | 3.67E-03 |
| -0.99577 | -3.24E-01 | 4.80404  | -3.99398 | 3.23E-04 | 7.84E-03 |
| 0.842456 | 2.98E+00  | 0.519015 | 3.632407 | 9.02E-04 | 1.51E-02 |
| 0.914616 | 2.83E+00  | -0.52861 | 3.972722 | 3.44E-04 | 8.15E-03 |
| 0.344864 | 1.20E+00  | 4.40812  | 3.660622 | 8.34E-04 | 1.45E-02 |
| -0.94327 | -3.82E-01 | 4.77384  | -4.79315 | 3.08E-05 | 1.70E-03 |
| 0.662102 | 1.03E+00  | 10.00753 | 9.379073 | 5.05E-11 | 9.45E-08 |
| -3.11536 | -1.79E+00 | 9.840645 | -7.51548 | 9.12E-09 | 3.66E-06 |
| -3.85956 | -2.30E+00 | 1.280325 | -8.01509 | 2.17E-09 | 1.28E-06 |
| -1.32876 | -4.85E-01 | 3.794886 | -4.36937 | 1.08E-04 | 3.96E-03 |
| -1.15165 | -5.21E-01 | 4.606871 | -5.38848 | 5.14E-06 | 4.82E-04 |
| -1.39361 | -5.36E-01 | 8.464249 | -4.5685  | 6.01E-05 | 2.69E-03 |
| -0.98674 | -2.88E-01 | 7.222701 | -3.70708 | 7.32E-04 | 1.34E-02 |
| 0.342946 | 9.75E-01  | 5.012356 | 4.23623  | 1.60E-04 | 5.07E-03 |
| -1.04104 | -3.75E-01 | 8.744471 | -4.31797 | 1.26E-04 | 4.32E-03 |
| 1.045329 | 1.74E+00  | 6.887231 | 8.187843 | 1.33E-09 | 9.00E-07 |
| -0.97533 | -3.37E-01 | 3.168874 | -4.17446 | 1.92E-04 | 5.72E-03 |
| -1.18655 | -4.76E-01 | 6.675645 | -4.75121 | 3.49E-05 | 1.85E-03 |
| 0.441914 | 1.04E+00  | 6.021579 | 5.053678 | 1.41E-05 | 1.04E-03 |
| -1.89456 | -7.57E-01 | 2.210024 | -4.73676 | 3.64E-05 | 1.91E-03 |
| 0.310577 | 9.07E-01  | 7.236398 | 4.147448 | 2.07E-04 | 5.99E-03 |
| 0.41682  | 1.11E+00  | 6.477133 | 4.463243 | 8.21E-05 | 3.36E-03 |
| -1.28164 | -4.97E-01 | 3.778115 | -4.60604 | 5.38E-05 | 2.45E-03 |
| 0.540187 | 1.34E+00  | 6.365687 | 4.763687 | 3.36E-05 | 1.81E-03 |
| 0.59772  | 1.46E+00  | 3.287378 | 4.833216 | 2.73E-05 | 1.60E-03 |
| 0.41559  | 1.37E+00  | 8.316591 | 3.79792  | 5.66E-04 | 1.13E-02 |
| 0.714917 | 1.93E+00  | 4.048068 | 4.421359 | 9.29E-05 | 3.61E-03 |
| 0.293014 | 1.07E+00  | 7.094039 | 3.555632 | 1.12E-03 | 1.69E-02 |
| -1.26509 | -3.52E-01 | 2.725908 | -3.59526 | 1.00E-03 | 1.60E-02 |
| 0.66511  | 1.92E+00  | 0.000476 | 4.189239 | 1.84E-04 | 5.60E-03 |
| -1.45689 | -6.43E-01 | 4.872759 | -5.24152 | 8.01E-06 | 6.72E-04 |
| -1.19466 | -4.29E-01 | 2.593279 | -4.30528 | 1.31E-04 | 4.39E-03 |

|          |           |          |          |          |          |
|----------|-----------|----------|----------|----------|----------|
| -0.87542 | -3.03E-01 | 4.836471 | -4.17951 | 1.89E-04 | 5.68E-03 |
| 0.55506  | 1.93E+00  | 0.41656  | 3.666584 | 8.20E-04 | 1.43E-02 |
| -1.33183 | -4.29E-01 | 2.987977 | -3.9618  | 3.54E-04 | 8.30E-03 |
| 0.286666 | 9.93E-01  | 6.410063 | 3.679013 | 7.92E-04 | 1.41E-02 |
| -1.44176 | -5.97E-01 | 3.431093 | -4.90207 | 2.22E-05 | 1.42E-03 |
| 0.359057 | 9.39E-01  | 3.68492  | 4.546777 | 6.41E-05 | 2.79E-03 |
| 0.463086 | 1.34E+00  | 8.104688 | 4.16714  | 1.96E-04 | 5.76E-03 |
| -1.37293 | -4.79E-01 | 4.088458 | -4.21101 | 1.72E-04 | 5.33E-03 |
| 0.507836 | 8.57E-01  | 8.20442  | 7.93588  | 2.72E-09 | 1.46E-06 |
| 0.680602 | 1.63E+00  | 2.990649 | 4.938035 | 2.00E-05 | 1.33E-03 |
| -0.94346 | -2.98E-01 | 4.100953 | -3.90518 | 4.17E-04 | 9.24E-03 |
| 0.735484 | 2.40E+00  | 1.78909  | 3.825013 | 5.24E-04 | 1.09E-02 |
| 0.403424 | 1.37E+00  | 1.897803 | 3.724405 | 6.97E-04 | 1.30E-02 |
| 0.844663 | 1.67E+00  | 4.410663 | 6.187177 | 4.63E-07 | 7.75E-05 |
| -0.98515 | -5.40E-01 | 7.492739 | -6.9569  | 4.67E-08 | 1.39E-05 |
| -1.07355 | -4.28E-01 | 4.836453 | -4.71987 | 3.83E-05 | 1.98E-03 |
| -1.86375 | -5.43E-01 | 0.999694 | -3.70088 | 7.45E-04 | 1.35E-02 |
| -1.01659 | -3.71E-01 | 9.5961   | -4.36325 | 1.10E-04 | 4.02E-03 |
| 0.428951 | 1.15E+00  | 4.886158 | 4.446009 | 8.64E-05 | 3.47E-03 |
| 0.80277  | 2.38E+00  | 5.894963 | 4.093648 | 2.42E-04 | 6.66E-03 |
| 0.498913 | 1.38E+00  | 3.366537 | 4.325222 | 1.23E-04 | 4.27E-03 |
| 0.409364 | 1.29E+00  | 3.47396  | 3.916097 | 4.04E-04 | 9.08E-03 |
| -4.45306 | -1.48E+00 | -1.58398 | -4.05884 | 2.68E-04 | 7.11E-03 |
| 0.294409 | 1.03E+00  | 3.949214 | 3.662898 | 8.29E-04 | 1.44E-02 |
| -1.06528 | -2.95E-01 | 2.830126 | -3.58989 | 1.02E-03 | 1.61E-02 |
| -0.90558 | -4.83E-01 | 7.977387 | -6.66617 | 1.11E-07 | 2.58E-05 |
| 0.593766 | 1.73E+00  | 1.475184 | 4.160457 | 2.00E-04 | 5.86E-03 |
| 0.28185  | 9.82E-01  | 7.10921  | 3.666483 | 8.20E-04 | 1.43E-02 |
| -2.07839 | -5.76E-01 | -0.08363 | -3.58874 | 1.02E-03 | 1.61E-02 |
| 0.507416 | 1.89E+00  | 3.862289 | 3.518591 | 1.24E-03 | 1.82E-02 |
| -1.19668 | -3.42E-01 | 1.768841 | -3.65811 | 8.40E-04 | 1.45E-02 |
| -0.81034 | -3.74E-01 | 6.150647 | -5.5086  | 3.58E-06 | 3.65E-04 |
| 0.366078 | 1.25E+00  | 6.629605 | 3.718716 | 7.08E-04 | 1.31E-02 |
| 0.389044 | 1.38E+00  | 4.217525 | 3.620954 | 9.32E-04 | 1.53E-02 |
| -1.4952  | -7.72E-01 | 4.966114 | -6.37049 | 2.67E-07 | 5.12E-05 |
| 0.332169 | 1.18E+00  | 4.015452 | 3.625603 | 9.20E-04 | 1.52E-02 |
| -1.54908 | -5.12E-01 | 2.824469 | -4.03576 | 2.86E-04 | 7.38E-03 |
| 0.824528 | 2.09E+00  | 1.421041 | 4.670174 | 4.44E-05 | 2.18E-03 |
| 0.427433 | 1.12E+00  | 6.586115 | 4.530387 | 6.73E-05 | 2.88E-03 |
| -2.03145 | -5.87E-01 | 2.010978 | -3.68387 | 7.81E-04 | 1.39E-02 |
| 0.911585 | 2.30E+00  | 1.081674 | 4.691438 | 4.17E-05 | 2.08E-03 |
| -1.00083 | -3.46E-01 | 7.193069 | -4.17684 | 1.90E-04 | 5.69E-03 |
| -1.70011 | -5.39E-01 | 2.079829 | -3.91852 | 4.01E-04 | 9.04E-03 |
| 0.623298 | 1.48E+00  | 4.337519 | 4.996319 | 1.68E-05 | 1.16E-03 |
| -1.11416 | -3.90E-01 | 4.582388 | -4.22279 | 1.66E-04 | 5.21E-03 |
| 0.611984 | 1.59E+00  | 3.237008 | 4.561347 | 6.14E-05 | 2.70E-03 |
| -1.94712 | -5.17E-01 | 4.324271 | -3.49852 | 1.31E-03 | 1.89E-02 |

|          |           |          |          |          |          |
|----------|-----------|----------|----------|----------|----------|
| -1.1518  | -4.74E-01 | 3.987251 | -4.8712  | 2.44E-05 | 1.51E-03 |
| 0.548852 | 1.23E+00  | 9.645091 | 5.298995 | 6.74E-06 | 6.00E-04 |
| -1.89111 | -6.23E-01 | 1.195024 | -4.02698 | 2.94E-04 | 7.47E-03 |
| -0.81268 | -4.17E-01 | 5.962341 | -6.31374 | 3.17E-07 | 5.93E-05 |
| -1.22244 | -4.16E-01 | 3.219497 | -4.12792 | 2.19E-04 | 6.24E-03 |
| 0.497834 | 1.51E+00  | 3.122432 | 4.029952 | 2.91E-04 | 7.45E-03 |
| 0.647177 | 2.28E+00  | 3.012677 | 3.639683 | 8.84E-04 | 1.51E-02 |
| 0.659926 | 1.74E+00  | 2.467587 | 4.511804 | 7.11E-05 | 2.99E-03 |
| 0.411097 | 1.34E+00  | 6.700735 | 3.828981 | 5.18E-04 | 1.08E-02 |
| -1.54435 | -5.60E-01 | 2.534468 | -4.34028 | 1.18E-04 | 4.17E-03 |
| 0.647125 | 1.64E+00  | 4.775013 | 4.679648 | 4.32E-05 | 2.13E-03 |
| 0.58187  | 1.25E+00  | 3.462683 | 5.573451 | 2.94E-06 | 3.34E-04 |
| -1.49521 | -4.42E-01 | 2.157406 | -3.73413 | 6.78E-04 | 1.27E-02 |
| -1.89887 | -9.66E-01 | 3.145571 | -6.23668 | 3.99E-07 | 7.01E-05 |
| -1.0973  | -4.09E-01 | 5.768083 | -4.44299 | 8.72E-05 | 3.49E-03 |
| -1.45255 | -4.92E-01 | 2.41583  | -4.11489 | 2.28E-04 | 6.37E-03 |
| -0.90184 | -3.13E-01 | 4.883678 | -4.18703 | 1.85E-04 | 5.61E-03 |
| 0.754587 | 2.33E+00  | 0.884309 | 3.972086 | 3.44E-04 | 8.15E-03 |
| -2.68797 | -1.65E+00 | 2.966895 | -8.49159 | 5.69E-10 | 4.86E-07 |
| 1.081411 | 1.62E+00  | 12.08632 | 10.22123 | 5.57E-12 | 3.58E-08 |
| -2.02996 | -7.79E-01 | 2.30475  | -4.56202 | 6.13E-05 | 2.70E-03 |
| 0.420625 | 1.36E+00  | 3.084937 | 3.84474  | 4.95E-04 | 1.05E-02 |
| -2.72603 | -1.40E+00 | 3.392239 | -6.29227 | 3.38E-07 | 6.19E-05 |
| 0.29248  | 9.32E-01  | 2.960234 | 3.888567 | 4.37E-04 | 9.61E-03 |
| -1.25652 | -3.85E-01 | 2.5754   | -3.82325 | 5.27E-04 | 1.09E-02 |
| 0.537068 | 1.26E+00  | 9.833779 | 5.038255 | 1.48E-05 | 1.07E-03 |
| 0.555885 | 1.20E+00  | 9.671627 | 5.534646 | 3.31E-06 | 3.53E-04 |
| 0.336692 | 8.59E-01  | 10.10167 | 4.650723 | 4.71E-05 | 2.27E-03 |
| 0.614974 | 1.26E+00  | 6.985284 | 5.916819 | 1.04E-06 | 1.46E-04 |
| 0.741329 | 2.14E+00  | 1.982946 | 4.186659 | 1.85E-04 | 5.61E-03 |
| -1.13087 | -4.58E-01 | 3.659981 | -4.79931 | 3.02E-05 | 1.69E-03 |
| -1.2261  | -4.29E-01 | 4.976549 | -4.21588 | 1.70E-04 | 5.27E-03 |
| -0.93135 | -3.15E-01 | 5.012639 | -4.10804 | 2.32E-04 | 6.43E-03 |
| 0.470419 | 7.88E-01  | 9.148255 | 8.050533 | 1.96E-09 | 1.26E-06 |
| 0.595858 | 1.56E+00  | 2.722885 | 4.54714  | 6.40E-05 | 2.79E-03 |
| -1.17033 | -4.00E-01 | 3.443757 | -4.14369 | 2.10E-04 | 6.03E-03 |
| 0.390223 | 8.78E-01  | 7.096788 | 5.282813 | 7.07E-06 | 6.26E-04 |
| -1.17459 | -3.71E-01 | 2.827809 | -3.90548 | 4.17E-04 | 9.24E-03 |
| 0.638678 | 1.04E+00  | 9.013345 | 8.56046  | 4.69E-10 | 4.30E-07 |
| -1.30667 | -3.82E-01 | 2.978696 | -3.70645 | 7.33E-04 | 1.34E-02 |
| 0.600622 | 1.34E+00  | 10.05858 | 5.349717 | 5.78E-06 | 5.26E-04 |
| -0.9846  | -4.02E-01 | 7.584764 | -4.83069 | 2.75E-05 | 1.60E-03 |
| -0.99928 | -4.55E-01 | 4.68026  | -5.43256 | 4.50E-06 | 4.41E-04 |
| 0.438789 | 1.30E+00  | 3.365528 | 4.111809 | 2.30E-04 | 6.39E-03 |
| -1.13543 | -4.78E-01 | 3.161988 | -4.98743 | 1.72E-05 | 1.19E-03 |
| -1.47802 | -6.28E-01 | 3.813338 | -5.03124 | 1.51E-05 | 1.09E-03 |
| 0.515654 | 1.17E+00  | 3.684642 | 5.208881 | 8.84E-06 | 7.27E-04 |

|          |           |          |          |          |          |
|----------|-----------|----------|----------|----------|----------|
| 1.244102 | 3.06E+00  | 0.653696 | 4.808891 | 2.94E-05 | 1.67E-03 |
| -0.87794 | -3.49E-01 | 7.583092 | -4.71689 | 3.87E-05 | 1.99E-03 |
| 0.48942  | 1.03E+00  | 6.808954 | 5.687544 | 2.09E-06 | 2.55E-04 |
| -1.62355 | -6.55E-01 | 1.830147 | -4.77966 | 3.21E-05 | 1.75E-03 |
| 0.321405 | 1.13E+00  | 3.841056 | 3.649197 | 8.61E-04 | 1.48E-02 |
| 0.744127 | 2.10E+00  | 5.256769 | 4.263767 | 1.48E-04 | 4.82E-03 |
| 0.337127 | 1.16E+00  | 3.656071 | 3.699661 | 7.47E-04 | 1.35E-02 |
| 0.673258 | 2.38E+00  | -0.06112 | 3.631775 | 9.04E-04 | 1.51E-02 |
| -1.44426 | -5.84E-01 | 5.045305 | -4.78761 | 3.13E-05 | 1.72E-03 |
| -1.8325  | -9.63E-01 | 7.539948 | -6.52667 | 1.67E-07 | 3.64E-05 |
| -1.6634  | -4.85E-01 | 2.152069 | -3.70523 | 7.36E-04 | 1.34E-02 |
| 0.262187 | 1.00E+00  | 5.221604 | 3.468119 | 1.42E-03 | 2.00E-02 |
| 0.587743 | 1.60E+00  | 1.987403 | 4.400455 | 9.88E-05 | 3.71E-03 |
| 0.380504 | 1.06E+00  | 4.201846 | 4.307926 | 1.30E-04 | 4.38E-03 |
| 0.339997 | 1.09E+00  | 2.670158 | 3.881623 | 4.46E-04 | 9.76E-03 |
| 0.561062 | 2.00E+00  | 1.486086 | 3.610542 | 9.59E-04 | 1.55E-02 |
| -1.03104 | -4.37E-01 | 6.36694  | -5.02355 | 1.54E-05 | 1.09E-03 |
| 0.686859 | 1.64E+00  | 3.755659 | 4.953474 | 1.90E-05 | 1.29E-03 |
| -1.34059 | -6.80E-01 | 5.045336 | -6.21758 | 4.23E-07 | 7.33E-05 |
| -1.4398  | -6.24E-01 | 3.753366 | -5.13627 | 1.10E-05 | 8.61E-04 |
| 0.304978 | 1.02E+00  | 7.628416 | 3.764779 | 6.22E-04 | 1.20E-02 |
| 1.238621 | 3.51E+00  | 1.014309 | 4.25035  | 1.54E-04 | 4.92E-03 |
| 0.36033  | 8.90E-01  | 9.847018 | 4.796432 | 3.05E-05 | 1.69E-03 |
| 0.459627 | 1.05E+00  | 4.779745 | 5.206298 | 8.91E-06 | 7.28E-04 |
| -1.45403 | -5.37E-01 | 4.573451 | -4.40995 | 9.61E-05 | 3.67E-03 |
| 0.36818  | 1.23E+00  | 4.00845  | 3.768458 | 6.15E-04 | 1.20E-02 |
| 0.598357 | 1.51E+00  | 8.511123 | 4.691166 | 4.17E-05 | 2.08E-03 |
| 0.377262 | 1.17E+00  | 5.257456 | 3.968696 | 3.48E-04 | 8.18E-03 |
| 1.40965  | 4.97E+00  | -1.76448 | 3.639484 | 8.85E-04 | 1.51E-02 |
| 0.929529 | 2.95E+00  | 4.720544 | 3.898061 | 4.26E-04 | 9.38E-03 |
| -1.13629 | -4.52E-01 | 4.188155 | -4.71084 | 3.94E-05 | 2.00E-03 |
| -1.12912 | -4.82E-01 | 5.176903 | -5.05374 | 1.41E-05 | 1.04E-03 |
| -1.73408 | -6.26E-01 | 2.615584 | -4.32834 | 1.22E-04 | 4.25E-03 |
| -2.10655 | -7.38E-01 | 0.661757 | -4.2222  | 1.67E-04 | 5.21E-03 |
| 0.327498 | 9.11E-01  | 6.736327 | 4.311597 | 1.28E-04 | 4.36E-03 |
| 0.534155 | 1.36E+00  | 5.779997 | 4.665253 | 4.51E-05 | 2.20E-03 |
| 0.340054 | 8.71E-01  | 4.773995 | 4.632937 | 4.96E-05 | 2.36E-03 |
| 0.479884 | 1.32E+00  | 2.262232 | 4.357111 | 1.12E-04 | 4.06E-03 |
| 0.303329 | 1.01E+00  | 2.716347 | 3.778567 | 5.98E-04 | 1.18E-02 |
| -2.56689 | -1.06E+00 | 1.140782 | -4.86817 | 2.46E-05 | 1.51E-03 |
| 0.378261 | 1.38E+00  | 2.752531 | 3.563557 | 1.09E-03 | 1.67E-02 |
| -2.68786 | -9.49E-01 | 5.541509 | -4.24714 | 1.55E-04 | 4.95E-03 |
| -2.38708 | -9.31E-01 | 0.751619 | -4.62773 | 5.04E-05 | 2.36E-03 |
| -1.73421 | -6.69E-01 | 7.282916 | -4.58275 | 5.76E-05 | 2.60E-03 |
| -1.29375 | -6.90E-01 | 9.063073 | -6.67886 | 1.06E-07 | 2.53E-05 |
| -0.98609 | -3.43E-01 | 3.18869  | -4.19788 | 1.79E-04 | 5.48E-03 |
| 0.43426  | 1.42E+00  | 1.884497 | 3.825124 | 5.24E-04 | 1.09E-02 |

|          |           |          |          |          |          |
|----------|-----------|----------|----------|----------|----------|
| 0.99795  | 3.59E+00  | 1.753979 | 3.593797 | 1.01E-03 | 1.60E-02 |
| -1.48995 | -4.35E-01 | 2.972488 | -3.7058  | 7.34E-04 | 1.34E-02 |
| -0.96385 | -5.05E-01 | 6.093666 | -6.50448 | 1.79E-07 | 3.77E-05 |
| -8.0918  | -3.24E+00 | -2.36445 | -4.7468  | 3.54E-05 | 1.87E-03 |
| 0.419184 | 1.29E+00  | 5.064507 | 3.980779 | 3.36E-04 | 8.07E-03 |
| 0.421413 | 1.57E+00  | 1.925674 | 3.523841 | 1.22E-03 | 1.80E-02 |
| 0.514322 | 1.39E+00  | 3.183032 | 4.415799 | 9.44E-05 | 3.65E-03 |
| -1.46052 | -7.39E-01 | 7.683048 | -6.19372 | 4.54E-07 | 7.75E-05 |
| -1.24046 | -5.77E-01 | 4.011327 | -5.56363 | 3.03E-06 | 3.38E-04 |
| -1.36009 | -5.77E-01 | 4.768096 | -5.02364 | 1.54E-05 | 1.09E-03 |
| 0.401281 | 1.26E+00  | 4.246298 | 3.930404 | 3.88E-04 | 8.86E-03 |
| 0.324082 | 8.57E-01  | 7.380047 | 4.501944 | 7.32E-05 | 3.07E-03 |
| 0.428973 | 1.18E+00  | 4.193853 | 4.339861 | 1.18E-04 | 4.17E-03 |
| 0.373734 | 1.32E+00  | 1.658642 | 3.63219  | 9.03E-04 | 1.51E-02 |
| -0.95552 | -2.61E-01 | 2.945296 | -3.55505 | 1.12E-03 | 1.69E-02 |
| -1.86975 | -4.91E-01 | 1.604547 | -3.47793 | 1.39E-03 | 1.96E-02 |
| -2.48202 | -8.76E-01 | 1.48959  | -4.24545 | 1.56E-04 | 4.96E-03 |
| 0.409626 | 1.46E+00  | 2.469598 | 3.611169 | 9.58E-04 | 1.55E-02 |
| -1.4598  | -4.39E-01 | 1.468905 | -3.78024 | 5.95E-04 | 1.17E-02 |
| 0.428466 | 1.64E+00  | 2.484526 | 3.468558 | 1.42E-03 | 2.00E-02 |
| 0.564602 | 1.88E+00  | 1.533252 | 3.781019 | 5.94E-04 | 1.17E-02 |
| -1.65284 | -4.93E-01 | 2.415641 | -3.75977 | 6.31E-04 | 1.21E-02 |
| -1.80369 | -6.79E-01 | 8.719893 | -4.4829  | 7.75E-05 | 3.24E-03 |
| -5.32894 | -1.47E+00 | -2.02256 | -3.57519 | 1.06E-03 | 1.64E-02 |
| 0.472706 | 1.11E+00  | 4.180163 | 5.061053 | 1.38E-05 | 1.04E-03 |
| -1.98891 | -5.23E-01 | 3.464809 | -3.48048 | 1.38E-03 | 1.95E-02 |
| -1.47987 | -4.52E-01 | 4.461209 | -3.8183  | 5.34E-04 | 1.09E-02 |
| -1.16934 | -3.66E-01 | 3.653619 | -3.88135 | 4.46E-04 | 9.76E-03 |
| 0.335592 | 9.27E-01  | 4.295534 | 4.334771 | 1.20E-04 | 4.22E-03 |
| 0.358162 | 1.09E+00  | 3.357928 | 4.030256 | 2.91E-04 | 7.45E-03 |
| -1.77512 | -1.11E+00 | 6.33624  | -8.83272 | 2.21E-10 | 2.56E-07 |
| -5.15044 | -1.78E+00 | -0.22779 | -4.18496 | 1.86E-04 | 5.61E-03 |
| -0.82363 | -3.65E-01 | 8.728143 | -5.25868 | 7.61E-06 | 6.51E-04 |
| 0.453131 | 1.66E+00  | 2.071533 | 3.561647 | 1.10E-03 | 1.67E-02 |
| -1.0467  | -3.70E-01 | 5.564625 | -4.25008 | 1.54E-04 | 4.92E-03 |
| -1.05968 | -3.54E-01 | 4.475611 | -4.07034 | 2.59E-04 | 6.99E-03 |
| 0.320418 | 8.94E-01  | 5.538575 | 4.299039 | 1.33E-04 | 4.44E-03 |
| 0.591669 | 1.44E+00  | 4.96099  | 4.865544 | 2.48E-05 | 1.51E-03 |
| 0.714182 | 1.51E+00  | 2.754768 | 5.663344 | 2.24E-06 | 2.72E-04 |
| 0.402909 | 1.44E+00  | 2.277488 | 3.604761 | 9.75E-04 | 1.57E-02 |
| -0.93598 | -2.69E-01 | 3.683403 | -3.66794 | 8.17E-04 | 1.43E-02 |
| -2.26974 | -9.49E-01 | 7.228958 | -4.94926 | 1.93E-05 | 1.30E-03 |
| -0.97433 | -3.61E-01 | 4.771645 | -4.42665 | 9.15E-05 | 3.58E-03 |
| -1.22039 | -3.85E-01 | 3.176257 | -3.90661 | 4.15E-04 | 9.24E-03 |
| 0.392141 | 1.03E+00  | 4.093909 | 4.527433 | 6.79E-05 | 2.89E-03 |
| -0.95439 | -3.59E-01 | 9.991361 | -4.47804 | 7.86E-05 | 3.26E-03 |
| -1.85335 | -5.49E-01 | 0.490751 | -3.7419  | 6.63E-04 | 1.25E-02 |

|          |           |          |          |          |          |
|----------|-----------|----------|----------|----------|----------|
| 0.673312 | 1.47E+00  | 5.93135  | 5.447519 | 4.30E-06 | 4.28E-04 |
| -1.98458 | -5.81E-01 | 1.536458 | -3.71391 | 7.18E-04 | 1.32E-02 |
| -1.21449 | -5.55E-01 | 4.006342 | -5.45254 | 4.24E-06 | 4.26E-04 |
| 0.678177 | 1.49E+00  | 7.500209 | 5.410293 | 4.81E-06 | 4.59E-04 |
| -0.96235 | -4.84E-01 | 5.30963  | -6.13685 | 5.38E-07 | 8.63E-05 |
| 0.515019 | 9.97E-01  | 7.642623 | 6.372444 | 2.66E-07 | 5.12E-05 |
| 0.91723  | 3.02E+00  | 0.995653 | 3.803179 | 5.58E-04 | 1.12E-02 |
| 0.362724 | 1.17E+00  | 1.771092 | 3.862213 | 4.71E-04 | 1.01E-02 |
| 0.291254 | 9.52E-01  | 3.60484  | 3.821606 | 5.29E-04 | 1.09E-02 |
| 0.741655 | 1.78E+00  | 5.638116 | 4.930422 | 2.04E-05 | 1.34E-03 |
| -1.03918 | -5.39E-01 | 7.429113 | -6.40265 | 2.43E-07 | 4.87E-05 |
| -5.14902 | -2.70E+00 | -0.08545 | -6.51205 | 1.75E-07 | 3.74E-05 |
| 0.442544 | 1.40E+00  | 7.104483 | 3.905727 | 4.16E-04 | 9.24E-03 |
| 0.830977 | 1.55E+00  | 7.776706 | 6.722683 | 9.34E-08 | 2.27E-05 |
| 0.417636 | 1.25E+00  | 6.015764 | 4.080437 | 2.52E-04 | 6.83E-03 |
| 0.36894  | 1.21E+00  | 3.611364 | 3.820297 | 5.31E-04 | 1.09E-02 |
| 0.757918 | 2.01E+00  | 2.193677 | 4.480765 | 7.80E-05 | 3.25E-03 |
| -0.9515  | -3.09E-01 | 4.847544 | -3.98406 | 3.33E-04 | 8.01E-03 |
| -1.60252 | -9.44E-01 | 4.826048 | -7.85567 | 3.42E-09 | 1.76E-06 |
| -6.50119 | -3.09E+00 | -3.42889 | -5.70443 | 1.98E-06 | 2.45E-04 |
| -0.93133 | -2.58E-01 | 3.233638 | -3.58349 | 1.03E-03 | 1.62E-02 |
| -1.85185 | -4.85E-01 | 1.586574 | -3.47242 | 1.41E-03 | 1.98E-02 |
| 0.510677 | 1.88E+00  | 3.437108 | 3.548811 | 1.14E-03 | 1.71E-02 |
| 0.402199 | 8.24E-01  | 5.529716 | 5.906301 | 1.08E-06 | 1.49E-04 |
| -1.60661 | -8.87E-01 | 4.519983 | -7.03845 | 3.67E-08 | 1.15E-05 |
| 0.279091 | 9.13E-01  | 7.00973  | 3.818206 | 5.34E-04 | 1.09E-02 |
| 0.573892 | 1.61E+00  | 3.763188 | 4.288923 | 1.37E-04 | 4.54E-03 |
| 0.468238 | 1.38E+00  | 5.032282 | 4.116785 | 2.27E-04 | 6.35E-03 |
| -0.9112  | -2.74E-01 | 3.903213 | -3.77817 | 5.99E-04 | 1.18E-02 |
| 0.544129 | 1.18E+00  | 4.300957 | 5.518037 | 3.48E-06 | 3.60E-04 |
| -0.82065 | -4.08E-01 | 6.407675 | -6.04406 | 7.12E-07 | 1.06E-04 |
| -1.13233 | -3.20E-01 | 2.751553 | -3.63453 | 8.97E-04 | 1.51E-02 |
| 0.671913 | 1.69E+00  | 4.270977 | 4.705947 | 3.99E-05 | 2.03E-03 |
| -1.17958 | -6.88E-01 | 6.353444 | -7.7263  | 4.96E-09 | 2.36E-06 |
| 1.263779 | 1.93E+00  | 10.98509 | 9.682201 | 2.26E-11 | 9.45E-08 |
| 0.272177 | 9.08E-01  | 5.074005 | 3.769917 | 6.13E-04 | 1.20E-02 |
| -1.53758 | -8.88E-01 | 5.189703 | -7.58773 | 7.40E-09 | 3.06E-06 |
| 1.110013 | 3.59E+00  | 2.781953 | 3.851164 | 4.87E-04 | 1.04E-02 |
| -1.30737 | -7.79E-01 | 6.277017 | -8.01186 | 2.19E-09 | 1.28E-06 |
| -1.13552 | -3.50E-01 | 3.159306 | -3.84279 | 4.98E-04 | 1.05E-02 |
| -1.72681 | -1.04E+00 | 5.307044 | -8.22537 | 1.20E-09 | 8.54E-07 |
| -1.42631 | -6.88E-01 | 4.400538 | -5.81684 | 1.41E-06 | 1.85E-04 |
| 0.372235 | 1.17E+00  | 4.00093  | 3.926976 | 3.92E-04 | 8.91E-03 |
| 0.970121 | 1.61E+00  | 5.103056 | 8.227136 | 1.19E-09 | 8.54E-07 |
| 0.39387  | 1.42E+00  | 1.387114 | 3.588623 | 1.02E-03 | 1.61E-02 |
| -0.91474 | -2.79E-01 | 4.576728 | -3.81737 | 5.36E-04 | 1.09E-02 |
| 1.030684 | 3.18E+00  | 2.139485 | 3.9788   | 3.38E-04 | 8.10E-03 |

|          |           |          |          |          |          |
|----------|-----------|----------|----------|----------|----------|
| -2.12122 | -1.02E+00 | 3.314793 | -5.8026  | 1.47E-06 | 1.91E-04 |
| -1.1932  | -5.51E-01 | 4.079588 | -5.51941 | 3.46E-06 | 3.60E-04 |
| -2.80921 | -1.04E+00 | 0.179607 | -4.42801 | 9.11E-05 | 3.58E-03 |
| 0.422758 | 1.50E+00  | 1.438619 | 3.628491 | 9.12E-04 | 1.52E-02 |
| 0.640832 | 1.53E+00  | 7.398437 | 4.951406 | 1.92E-05 | 1.29E-03 |
| 0.970273 | 2.25E+00  | 3.254    | 5.103524 | 1.21E-05 | 9.27E-04 |
| -1.44727 | -5.23E-01 | 2.476131 | -4.32987 | 1.22E-04 | 4.25E-03 |
| 0.462918 | 1.49E+00  | 1.697111 | 3.857913 | 4.77E-04 | 1.02E-02 |
| -0.93812 | -3.52E-01 | 7.701632 | -4.47521 | 7.92E-05 | 3.28E-03 |
| -2.04555 | -1.08E+00 | 4.022404 | -6.5622  | 1.51E-07 | 3.39E-05 |
| -2.4406  | -1.32E+00 | 1.365335 | -6.78991 | 7.65E-08 | 1.93E-05 |
| 1.301187 | 2.04E+00  | 11.22956 | 9.162291 | 9.04E-11 | 1.27E-07 |
| -1.07819 | -3.62E-01 | 4.083855 | -4.08458 | 2.49E-04 | 6.78E-03 |
| -1.28013 | -3.68E-01 | 4.461771 | -3.66764 | 8.18E-04 | 1.43E-02 |
| 0.407485 | 1.42E+00  | 1.886205 | 3.672758 | 8.06E-04 | 1.42E-02 |
| -0.96667 | -3.18E-01 | 4.062623 | -4.01848 | 3.01E-04 | 7.51E-03 |
| -1.04996 | -2.98E-01 | 3.594973 | -3.639   | 8.86E-04 | 1.51E-02 |
| -1.34005 | -7.53E-01 | 4.949036 | -7.23538 | 2.06E-08 | 6.96E-06 |
| 0.403699 | 9.85E-01  | 4.467352 | 4.85116  | 2.59E-05 | 1.54E-03 |
| 0.455478 | 1.17E+00  | 4.881791 | 4.626815 | 5.06E-05 | 2.36E-03 |
| 0.388834 | 9.63E-01  | 9.131939 | 4.783329 | 3.17E-05 | 1.74E-03 |
| 0.267033 | 1.00E+00  | 4.342613 | 3.510277 | 1.27E-03 | 1.85E-02 |
| 0.720556 | 1.17E+00  | 7.726415 | 8.566961 | 4.61E-10 | 4.30E-07 |
| -1.87582 | -9.80E-01 | 2.889528 | -6.47034 | 1.98E-07 | 4.08E-05 |
| -1.29009 | -3.91E-01 | 2.486077 | -3.79755 | 5.67E-04 | 1.13E-02 |
| -2.91979 | -8.81E-01 | -0.91769 | -3.787   | 5.84E-04 | 1.16E-02 |
| -1.65665 | -4.96E-01 | 0.131865 | -3.769   | 6.14E-04 | 1.20E-02 |
| 0.388829 | 1.07E+00  | 5.321318 | 4.341231 | 1.18E-04 | 4.17E-03 |
| -1.49121 | -8.09E-01 | 5.610376 | -6.84228 | 6.55E-08 | 1.75E-05 |
| -1.81114 | -5.78E-01 | 1.889422 | -3.93721 | 3.80E-04 | 8.75E-03 |
| -1.79554 | -7.95E-01 | 2.364916 | -5.25942 | 7.59E-06 | 6.51E-04 |
| 0.531161 | 1.43E+00  | 1.499949 | 4.433331 | 8.97E-05 | 3.56E-03 |
| -1.42542 | -4.03E-01 | 3.148694 | -3.63115 | 9.06E-04 | 1.52E-02 |
| 0.407725 | 1.50E+00  | 0.554683 | 3.549723 | 1.14E-03 | 1.71E-02 |
| -2.99268 | -8.71E-01 | -0.25823 | -3.69766 | 7.51E-04 | 1.35E-02 |
| -2.12311 | -5.89E-01 | 4.462796 | -3.58982 | 1.02E-03 | 1.61E-02 |
| 1.454308 | 3.05E+00  | 0.44527  | 5.725632 | 1.86E-06 | 2.34E-04 |
| -1.23721 | -3.76E-01 | 3.432715 | -3.80752 | 5.51E-04 | 1.12E-02 |
| 0.593218 | 1.28E+00  | 9.19084  | 5.529071 | 3.36E-06 | 3.54E-04 |
